# Supplementary material for: Effectiveness of antitussives, anticholinergics or honey versus usual care in adults with uncomplicated acute bronchitis: a study protocol of an open randomised clinical trial in primary care
Source: PubMed Central journal article supplement — BMJ Open. 2019 May 16;9(5):e028159. doi: 10.1136/bmjopen-2018-028159 (PMC6530348; doi:10.1136/bmjopen-2018-028159), 2019-05-16
Supplement: bmjopen-2018-028159.draft_revisions.pdf [file bmjopen-2018-028159.draft_revisions.pdf]

# BMJ Open

BMJ Open is committed to open peer review. As part of this commitment we make the peer review history of every article we publish publicly available.

When an article is published we post the peer reviewers' comments and the authors' responses online. We also post the versions of the paper that were used during peer review. These are the versions that the peer review comments apply to.

The versions of the paper that follow are the versions that were submitted during the peer review process. They are not the versions of record or the final published versions. They should not be cited or distributed as the published version of this manuscript.

BMJ Open is an open access journal and the full, final, typeset and author-corrected version of record of the manuscript is available on our site with no access controls, subscription charges or pay-per-view fees (<http://bmjopen.bmj.com>).

If you have any questions on BMJ Open's open peer review process please email [info.bmjopen@bmj.com](mailto:info.bmjopen@bmj.com)

# BMJ Open

**Effectiveness of antitussives, anticholinergics and honey versus usual care in adults with uncomplicated acute bronchitis. An open randomized clinical trial in primary care. The AB4T study protocol.**

|                               |                                                                                                                                                                                                                                                                                                                                                                                                                                                                                                                                                                                                                                                                                                                                                                                                                                                                                                                                                                                                                                                                                                                                                                                                                                                                                                                                                                                          |
|-------------------------------|------------------------------------------------------------------------------------------------------------------------------------------------------------------------------------------------------------------------------------------------------------------------------------------------------------------------------------------------------------------------------------------------------------------------------------------------------------------------------------------------------------------------------------------------------------------------------------------------------------------------------------------------------------------------------------------------------------------------------------------------------------------------------------------------------------------------------------------------------------------------------------------------------------------------------------------------------------------------------------------------------------------------------------------------------------------------------------------------------------------------------------------------------------------------------------------------------------------------------------------------------------------------------------------------------------------------------------------------------------------------------------------|
| Journal:                      | <i>BMJ Open</i>                                                                                                                                                                                                                                                                                                                                                                                                                                                                                                                                                                                                                                                                                                                                                                                                                                                                                                                                                                                                                                                                                                                                                                                                                                                                                                                                                                          |
| Manuscript ID                 | bmjopen-2018-028159                                                                                                                                                                                                                                                                                                                                                                                                                                                                                                                                                                                                                                                                                                                                                                                                                                                                                                                                                                                                                                                                                                                                                                                                                                                                                                                                                                      |
| Article Type:                 | Protocol                                                                                                                                                                                                                                                                                                                                                                                                                                                                                                                                                                                                                                                                                                                                                                                                                                                                                                                                                                                                                                                                                                                                                                                                                                                                                                                                                                                 |
| Date Submitted by the Author: | 24-Nov-2018                                                                                                                                                                                                                                                                                                                                                                                                                                                                                                                                                                                                                                                                                                                                                                                                                                                                                                                                                                                                                                                                                                                                                                                                                                                                                                                                                                              |
| Complete List of Authors:     | <p>Cots, Josep M.; Universitat de Barcelona, Primary Healthcare Centre La Marina, Barcelona, Spain</p> <p>Moragas, Ana; Universitat Rovira i Virgili, Primary Healthcare Centre Jaume I, Tarragona, Spain</p> <p>García-Sangenís, Ana; Institut Universitari d'Investigació en Atenció Primària Jordi Gol (IDIAP Jordi Gol), Medicines Research Unit; Plataforma SCReN, UICEC IDIAP Jordi Gol</p> <p>Morros, Rosa; Institut Universitari d'Investigació en Atenció Primària Jordi Gol (IDIAP Jordi Gol), Medicines Research Unit; Universitat Autònoma de Barcelona, Departament de Farmacologia i Terapèutica</p> <p>Gomez, Ainhoa; Institut Universitari d'Investigació en Atenció Primària Jordi Gol (IDIAP Jordi Gol), Medicines Research Unit Barcelona, ES</p> <p>Ouchi, Dan; Institut Universitari d'Investigació en Atenció Primària (IDIAP) Jordi Gol</p> <p>Monfà, Ramon ; Institut Universitari d'Investigació en Atenció Primària (IDIAP) Jordi Gol</p> <p>Pera, Helena; Institut Universitari d'Investigació en Atenció Primària Jordi Gol (IDIAP Jordi Gol), Medicines Research Unit; Plataforma SCReN, UICEC IDIAP Jordi Gol</p> <p>Pujol, Jesus; Balaguer Health Centre, Balaguer</p> <p>Bayona, Carolina; Primary Healthcare Centre La Marina de la Poza, Mariam; Institut Català de la Salut</p> <p>Llor, Carl; Primary healthcare centre Barcelona-2B (Via Roma),</p> |
| Keywords:                     | INFECTIOUS DISEASES, THERAPEUTICS, Respiratory infections < THORACIC MEDICINE                                                                                                                                                                                                                                                                                                                                                                                                                                                                                                                                                                                                                                                                                                                                                                                                                                                                                                                                                                                                                                                                                                                                                                                                                                                                                                            |
|                               |                                                                                                                                                                                                                                                                                                                                                                                                                                                                                                                                                                                                                                                                                                                                                                                                                                                                                                                                                                                                                                                                                                                                                                                                                                                                                                                                                                                          |

SCHOLARONE™  
Manuscripts

**Title**

Effectiveness of antitussives, anticholinergics and honey versus usual care in adults with uncomplicated acute bronchitis. An open randomized clinical trial in primary care. The AB4T study protocol.

**Authors**

Josep M. Cots, GP<sup>1</sup>; Ana Moragas, GP<sup>2</sup>; Anna García-Sangenís, monitor<sup>3,4,5</sup>; Rosa Morros, pharmacologist<sup>3,4,5</sup>; Ainhoa Gómez, pharmacologist<sup>3,4,5</sup>; Dan Ouchi, statistician<sup>3</sup>; Ramon Monfà, monitor<sup>3,4,5</sup>; Helena Pera<sup>3,4,5</sup>; Jesus Pujol, GP<sup>6</sup>; Carolina Bayona, GP<sup>2</sup>; Mariam de la Poza-Abad, GP<sup>7</sup>; Carl Llor, GP<sup>3,8</sup>

<sup>1</sup>La Marina Health Centre, Barcelona, Spain

<sup>2</sup>Jaume I Health Centre, Tarragona, Spain

<sup>3</sup>Institut Universitari d'Investigació en Atenció Primària (IDIAP) Jordi Gol, Barcelona, Spain

<sup>4</sup>Universitat Autònoma de Barcelona, Bellaterra, Spain

<sup>5</sup>Unidad de Investigación Clínica y Ensayos Clínicos = Plataforma ScREN, Spain

<sup>6</sup>Balaguer Health Centre, Balaguer, Spain

<sup>7</sup>Carrer del Foc Health Centre, Barcelona, Spain

<sup>8</sup>Via Roma Health Centre, Barcelona, Spain

**Corresponding author**

Carl Llor

Via Roma Primary Health Centre

c. Manso 19, 3rd floor

08015 Barcelona, Spain

Email: [carles.llor@gmail.com](mailto:carles.llor@gmail.com)

**ABSTRACT**

**Introduction:** Despite the frequent use of therapies in acute bronchitis, the evidence of their benefit is scarce, since only a few clinical trials have been published, with low sample sizes, poor methodological quality and mainly in children. The objective of this study is to compare the effectiveness of 3 symptomatic therapies (dextromethorphan, ipratropium and honey) associated with usual care and the usual care in adults with acute bronchitis.

**Methods and analysis:** This will be a multicentre, pragmatic, parallel group, open randomised trial. Patients aged 18 or over with uncomplicated acute bronchitis, with cough for less than three weeks as the main symptom, scoring  $\geq 4$  in either daytime or nocturnal cough on a 7-point Likert scale, will be randomised to one of the following four groups: usual care, dextromethorphan 30 mg t.i.d., ipratropium bromide inhaler 20  $\mu\text{g}$  2 puffs t.i.d, or 30 mg (a spoonful) of honey t.i.d., all taken for up to 14 days. The exclusion criteria will be pneumonia, criteria for hospital admission, pregnancy or lactation, concomitant pulmonary disease, associated significant comorbidity, allergy, intolerance or contraindication to any of the study drugs or admitted to a long-term residence. Sample: 668 patients. The primary outcome will be the number of days with moderate-severe cough. All patients will be given a symptom diary to be self-administered. A second visit will be scheduled at day 2-3 for assessing evolution, with two more visits at days 15 and 29 for clinical assessment, evaluation of adverse effects, re-attendance and complications. Patients still with symptoms at day 29 will be called six weeks after the baseline visit.

**Ethics and dissemination:** The study has been approved by the Ethical Board of IDIAP Jordi Gol (reference number: AC18/002). The findings of this trial will be disseminated through research conferences and peer-review journals.

**Trial registration number:** NCT03738917.

**STRENGTHS AND LIMITATIONS OF THIS STUDY**

- Since this is a pragmatic clinical trial evaluating the effectiveness of different symptomatic therapies, masking techniques will not be used.
- A microbiological study will not be carried out as most cases of acute bronchitis have a viral aetiology, and sputum samples are not routinely collected in the primary care setting.
- The main objective as well as some of the secondary objectives of the study are based on information provided by the patients themselves in the symptom diaries. However, clinicians will encourage patients to fill them out appropriately and return them at the different follow-up visits scheduled.
- Since one quarter of patients with uncomplicated acute bronchitis still have cough after the first month, these patients will be followed and called two weeks later.

## BACKGROUND

Lower respiratory tract infections are common conditions in primary care. These infections affect approximately 5% of adults per year, and although they occur throughout the year, the incidence is higher in the autumn and winter [1]. The most frequent of these infections is acute bronchitis, which is a self-limiting infection of the lower airways that is characterized by clinical manifestations of cough with or without sputum and the absence of symptoms or signs of pneumonia. Other symptoms associated with acute bronchitis include fatigue, wheezing, headache, myalgias, hoarseness, and general discomfort [2]. As there are no specific diagnostic criteria for acute bronchitis, the diagnosis is primarily clinical and requires thorough assessment for differentiation from pneumonia, as well as other upper respiratory tract infections such as the common cold or sore throat [3]. However, cough is not the prominent symptom in the latter infections. Conversely, cough constitutes the most prominent manifestation of acute bronchitis and lasts an average of 3 weeks, but may persist for more than 1 month in 25% of the patients [4]. Initially, the cough is non-productive, but after about a week there is an increase in mucus production, and in the second week, the colour of the sputum often changes from grey-white to purulent. Despite being a self-limiting condition, most patients with acute bronchitis seek medical advice, mainly because of bothersome cough [5].

Treatment of acute bronchitis is usually symptomatic and is aimed at relieving annoying respiratory symptoms. Treatment should include good hand hygiene, increased fluid intake, avoidance of smoking and the elimination of environmental cough triggers (for instance, dust), and the use of vapours, particularly in low-humidity environments, mainly if symptoms include nasal stuffiness and nasal discharge. Many general practitioners (GP) prescribe antibiotics, despite evidence of little or no benefit, since up to 90% of acute bronchitis are of viral aetiology, thereby contributing to the emergence of bacterial resistance [6].

There are many approaches to the treatment of cough, including analgesics, non-steroidal anti-inflammatory drugs (NSAIDs), expectorants, mucolytics, antihistamines, decongestants, as well as antitussives,  $\beta$ 2-agonists or other bronchodilators, alternative therapies and natural treatment [3]. In general, these therapies are available as over-the-counter medicines in many countries, and their use is very widespread, particularly in southern European countries. In a recent observational study conducted in 12 European areas, Catalonia was one of the zones with the highest consumption of mucolytics, bronchodilators and antitussives [7].

1  
2  
3 According to the guidelines of the European Respiratory Society, acute cough can be treated  
4 with dextromethorphan or codeine, but mucolytics, antihistamines and bronchodilators should  
5 not be prescribed in acute lower respiratory tract infections [1]. The reviews carried out so far  
6 do not conclude that the use of these therapies is beneficial. In general, the studies performed  
7 had small sample sizes and methodological flaws that make their comparison difficult [8]. It  
8 should be considered that over-the-counter preparations contain different drugs with a variety  
9 of modes of action that can make them difficult to compare [9]. Most clinicians recommend  
10 the use of analgesics to alleviate mainly fever, headache, myalgia, and chest pain. NSAIDs are  
11 also frequently prescribed in patients with lower respiratory infections, mainly for relieving  
12 cough. However, two recent randomised clinical trials have shown that the number of days  
13 with cough among patients taking NSAIDs is not significantly lower than placebo [10,11]. Some  
14 trials with inhaled corticosteroids have also shown a very marginal benefit, but the number of  
15 patients included in these studies was small [12]. The clinical efficacy of other symptomatic  
16 drugs is also questionable. For example, trials assessing the effect of expectorants and  
17 mucolytics have not shown favourable effects on cough associated with acute bronchitis [8].  
18 Despite being widely used, antihistamines have been evaluated primarily in the common cold  
19 and were not found to be beneficial to alleviate the symptoms of cough [13]. Studies assessing  
20 the benefits of *Echinacea*, Chinese herbs, *Pelargonium sidoides*, ivy leaf extracts and other  
21 herbal treatments have obtained contradictory results, mainly in patients with common cold,  
22 with low quality of evidence and some problems related to safety, and therefore, they are not  
23 recommended in patients with acute bronchitis [14-17].

24  
25  
26  
27  
28  
29  
30  
31  
32  
33  
34  
35  
36  
37  
38  
39 Most studies that have assessed the benefit of antitussives in adults, mainly codeine and  
40 dextromethorphan, have been performed in patients with acute cough in the context of upper  
41 airway infections, thus limiting the external validity to patients with acute bronchitis. The  
42 benefit of dextromethorphan in acute bronchitis is controversial. A non-systematic review  
43 published by Parvez *et al.*, including 451 adults, found that a single dose of 30 mg of  
44 dextromethorphan reduced the number of cough bouts measured with a microphone by  
45 between 19% and 36% within the first 3 hours compared with placebo [18], but a meta-  
46 analysis of six studies in adults with upper airway infections found that a single dose of  
47 dextromethorphan was slightly more effective than placebo in terms of intensity, effort and  
48 latency within the first three hours after intake (between 12 and 17% more effective),  
49 although the clinical relevance of this observation is unclear [19]. Studies carried out with  
50 codeine in adults with acute bronchitis have not been shown to be beneficial [20]. In children,  
51 dextromethorphan has not proven to be more effective than placebo [21]. In a Scandinavian  
52  
53  
54  
55  
56  
57  
58  
59  
60

1  
2  
3 study conducted in 50 children followed for 3 days, the average cough score was slightly lower  
4 than placebo, although statistically significant differences were not observed between those  
5 taking the antitussive and those assigned to placebo [22]. Despite this, some guidelines  
6 recommend a short course of antitussives to reduce severe cough during acute illness in adults  
7 and children over the age of six, but evidence related to their effectiveness remains unclear  
8 [23].  
9

10  
11  
12  
13 A non-negligible percentage of patients with acute bronchitis present exaggerated bronchial  
14 responsiveness, which is mainly reported when the infection is caused by viruses and atypical  
15 germs [24]. However, a recent review does not support the routine use of  $\beta$ 2-adrenergic  
16 inhalers in patients with acute bronchitis [25]. On the other hand, in one of the clinical trials  
17 included in this review a significant improvement in symptom scores was observed in adults  
18 who received fenoterol 0.2 mg q.i.d for 7 days when there was bronchial hyper-reactiveness,  
19 wheezing or a decrease in FEV<sub>1</sub> compared to the same group of patients who had received  
20 placebo. This effect, however, was not observed among patients not presenting airflow  
21 obstruction [26]. This same effect has been described with inhaled anticholinergics, such as  
22 ipratropium and tiotropium alone or associated with  $\beta$ 2-agonists, but these studies were  
23 primarily conducted in patients with cough due to upper airway infections [27,28]. The release  
24 of acetylcholine in the airways by parasympathetic stimulation could trigger hyper-  
25 reactivity and increase mucosal secretion on the walls of the airways, and this might explain  
26 the possible antitussive properties of inhaled anticholinergic drugs [29]. Other drugs such as  
27 leukotriene inhibitors have not shown to be useful in acute cough [30]. Despite all these  
28 limitations, the guidelines recommend that bronchodilators can only be used in patients with  
29 bronchial hyper-reactiveness, outweighing the adverse effects, such as tremors or  
30 nervousness, that these drugs can cause [31].  
31  
32  
33  
34  
35  
36  
37  
38  
39  
40  
41  
42  
43

44 In recent years, some studies using honey in children have found favourable results on the  
45 frequency of cough, patient quality of life and the quality of sleep of both parents and children.  
46 In a recent meta-analysis, including six clinical trials and a total of nearly 900 children, honey  
47 alleviated cough symptoms compared with no treatment or diphenhydramine, but was not  
48 found to be more effective than dextromethorphan. Apart from the limitations of the small  
49 sample sizes of these studies, most children received active treatment (different types of  
50 honey depending on the studies) for only one night, and studies evaluating their use in adult  
51 population are lacking [32].  
52  
53  
54  
55  
56  
57

58 Therefore, we believe that this clinical trial is justified, since evidence of the benefit of these  
59 treatments in adults with acute bronchitis, with cough as a predominant symptom, is unclear.  
60



1  
2  
3 We prioritize the use of dextromethorphan, as this antitussive is recommended by clinical  
4 guidelines at the usual dose of 15 mg t.i.d in the adult population, and ipratropium bromide  
5 inhalers, since the majority of studies carried out so far have considered  $\beta$ 2-agonists, with very  
6 poor results on effectiveness, and the fact that anticholinergics are frequently used in primary  
7 care in our country. In our study, we want to evaluate the effectiveness of honey at the  
8 recommended dose of 30 g t.i.d. in the adult population, since their benefit has only been  
9 explored in paediatrics. Unlike most published studies, these treatments will be recommended  
10 for a maximum of 14 days, because as discussed earlier the average duration of symptoms  
11 with cough due to acute bronchitis is 3 weeks.  
12  
13  
14  
15  
16  
17  
18  
19  
20

## 21 **OBJECTIVES**

22  
23 The main aim of the trial is to evaluate the clinical effectiveness of adding 3 symptomatic  
24 treatments (dextromethorphan, ipratropium bromide or honey) to usual care in reducing days  
25 with moderate-severe cough compared to usual care. The secondary objectives are aimed at  
26 evaluating the clinical effectiveness of adding 3 symptomatic treatments to usual care  
27 compared to usual care in the reduction of days: (1) with cough; (2) with moderate-severe  
28 daytime cough; (3) with moderate-severe nocturnal cough; (4) severe or moderate symptoms;  
29 (5) severe symptoms: (6) until the complete resolution of symptoms; (7) according to the  
30 baseline degree of bronchial hyper-reactiveness measured with peak-flow; and also (8) to  
31 evaluate the utilisation of antibiotics and different symptomatic treatments in the four arms;  
32 (9) to evaluate the number of days of absence from work in the four study arms; (10) to assess  
33 the number of times patients re-attend for symptoms related to the episode of acute  
34 bronchitis; (11) to assess the number of complications related to the episode of acute  
35 bronchitis; (12) to assess patient satisfaction in the four study arms; and (13) to assess the  
36 number of adverse events in the four study arms.  
37  
38  
39  
40  
41  
42  
43  
44  
45  
46  
47  
48

## 49 **METHODS AND ANALYSIS**

### 50 **Trial design**

51 This study is a phase IV, multicentre, pragmatic, parallel group, open randomised trial.  
52  
53  
54  
55  
56  
57

### 58 **Study arms**

59  
60

1  
2  
3 Once the patients are included in the trial, they will be randomised into one of the 4 treatment  
4 groups: (1) usual clinical practice group: (2) usual clinical practice + dextromethorphan (15 mg  
5 unit), one 15 mg-tablet t.i.d. up to a maximum of 14 days; (3) usual clinical practice +  
6 ipratropium bromide (20 µg each puff), 2 puffs t.i.d. up to a maximum of 14 days; and (4) usual  
7 clinical practice + 30 g of honey (one tablespoon) t.i.d. up to a maximum of 14 days; two 750  
8 mg bottles of wildflower honey (the most frequent type of honey used in our country) will be  
9 provided and patients will be recommended to add the honey to a cup of lemon or thyme  
10 juice, milk herbal tea, yogurt, as a hot toddy, etc. All the drugs and products used in this study  
11 are already marketed, and therefore, the manufacturers are responsible for the elaboration  
12 and control of samples. The study drugs will be provided free to the participants by the  
13 sponsor. The provision, secondary conditioning and distribution of the study drugs and  
14 products will be performed by the Barcelona Primary Care Pharmacy service. All the study  
15 drugs as well as the honey will be kept at room temperature. To improve compliance,  
16 participants will be asked to record their daily dosage in the symptom diary.  
17  
18  
19  
20  
21  
22  
23  
24  
25  
26  
27  
28  
29

### 30 **Sample size**

31 For the sample size calculation, a recent publication about delayed antibiotic prescribing  
32 carried out in Spain using the same symptom diaries with specific data from the group of  
33 patients with acute bronchitis has been considered, from which an average duration of 5.5  
34 days of moderate to severe cough was obtained, with a standard deviation of 4.5 days [33].  
35 Considering a reduction of 1.5 days as a clinically relevant outcome, a sample of 167 patients  
36 per group is estimated (a total of 668). The power to detect the difference was assumed to be  
37 0.8, with a two-sided significance level of 0.05. The allocation ratio of subjects into the groups  
38 is 1:1:1:1, and the drop-out rate is presumed to be 0.15. Calculations have been performed  
39 with the aid of GRANMO software, version 7.12 April 2012  
40 (<https://www.imim.cat/ofertadeserveis/software-public/granmo/>).  
41  
42  
43  
44  
45  
46  
47  
48  
49  
50

### 51 **Recruitment**

52 The trial will be conducted in different primary care centres in Catalonia, Spain. A large  
53 geographical area of practices throughout Catalonia will be invited to participate to maximise  
54 the generalisability of the sample of adults with uncomplicated acute bronchitis and to avoid  
55 saturation of research studies in some practices. The recruiting GPs will commence the study  
56 in January 2019 and will attempt to recruit all eligible patients until October 2020. Provided  
57  
58  
59  
60

1  
2  
3 the necessary sample is met before this date, the recruitment period will end at the time of  
4 the inclusion of the last patient. The sponsor reserves the right to prematurely discontinue this  
5 trial at any time in case (1) the expected inclusion objectives are not met or (2) new  
6 information appears regarding the efficacy or safety of any of the study medications that could  
7 significantly affect the continuation of the trial or overrules the previous positive evaluation of  
8 the benefit-risk ratio.  
9  
10  
11  
12  
13  
14  
15

## 16 **Participants**

### 17 *Inclusion criteria*

18  
19  
20 Potential participants who meet the following criteria will be included in this trial: (1) age 18  
21 years or older, (2) symptoms of acute bronchitis with cough starting within 3 weeks before  
22 study inclusion, (3) patients who score  $\geq 4$  in either the daytime and/or nocturnal cough on a  
23 7-point Likert scale, and (4) patients who consent to participate.  
24  
25  
26  
27  
28  
29

### 30 *Exclusion criteria*

31  
32 Patients with any of the following criteria will be excluded from this trial: (1) suspected  
33 pneumonia; if the professional suspects pneumonia, a chest X-ray will be recommended and  
34 the patient will be randomised if this diagnosis is discarded; (2) criteria for hospital admission  
35 (impaired consciousness, respiratory rate  $> 30$  breaths/minute, pulse  $> 125$  beats/minute,  
36 systolic blood pressure  $< 90$  mm Hg or diastolic blood pressure  $< 60$  mm Hg, temperature  $> 40^{\circ}\text{C}$   
37 or oxygen saturation  $< 92\%$ ); (3) pregnancy or breast feeding; (4) baseline respiratory disease  
38 such as chronic obstructive pulmonary disease, asthma, tuberculosis or bronchiectasis; (5)  
39 associated significant comorbidity, such as moderate-severe heart failure, dementia, acute  
40 myocardial infarction/recent cerebral vascular accident ( $< 3$  months), severe liver failure,  
41 severe renal failure; (6) immunosuppression, such as chronic infection by HIV, transplanted,  
42 neutropenic, or patients receiving immunosuppressive treatment; (7) active neoplasm; (8)  
43 terminal illness; (9) history of intolerance or allergy to any of the study treatments; (10)  
44 patients in whom, in the opinion of the investigator, treatment with dextromethorphan,  
45 ipratropium bromide or honey is contraindicated; (11) patients living in long-term institutions;  
46 (12) difficulty in conducting scheduled follow-up visits.  
47  
48  
49  
50  
51  
52  
53  
54  
55  
56

57 Following the usual clinical practice, participating GPs may prescribe the concomitant therapy  
58 they consider appropriate, including analgesics such as NSAIDs or paracetamol, mucolytics,  
59  
60

1  
2  
3 expectorants, antihistamines and also antibiotics. However, they will not be allowed to  
4 prescribe antitussives, including codeine, anticholinergic inhalers and they will not be allowed  
5 to recommend the use of honey, including honey candies, tablets or infusions with honey. All  
6 drug information (name of product, purpose of administration, dosage, duration of  
7 administration, etc) will be recorded on the patient case report form (CRF) and patients will fill  
8 out any other treatment they obtain or purchase from the pharmacy in their symptom diaries.  
9  
10  
11  
12  
13  
14

### 15 16 **Randomisation**

17 Patients will be assigned sequentially as they enter the study. Randomisation of patients will  
18 be performed by registering the patient in an electronic CRF during the index visit. Patients will  
19 be stratified based on the previous duration of symptoms ( $\leq 1$  week;  $> 1$  week). Once a patient  
20 is included in the trial, the investigator will provide the assigned treatment and record the  
21 dispensing and medication code in the electronic CRF. Since this is a multicentre study, a block  
22 procedure will be performed to assign patients to each of the health centres at a 1:1:1:1 ratio.  
23  
24  
25  
26  
27  
28  
29

### 30 31 **Blinding**

32 This is an open study. Neither physicians nor patients will be blind to the patient's assignment  
33 to the study group. The open nature of the clinical trial ensures that the results obtained in this  
34 study are very close to the reality of primary care, considering that both the participating GPs  
35 and the patients with uncomplicated acute bronchitis will be aware of the treatment given.  
36  
37  
38  
39  
40  
41  
42

### 43 44 **Outcome measures**

#### 45 *Primary outcome*

46 Duration (days) of moderate-severe cough in days. Each symptom will be scored by the patient  
47 on a 7-point Likert scale (0=not affected; 1=very little problem; 2=slight problem;  
48 3=moderately bad; 4=bad; 5=very bad; 6=as bad as it could be). The number of days until the  
49 last day the patient scores 3 in either daytime cough or nocturnal cough in the symptom diary  
50 will be considered for the main outcome.  
51  
52  
53  
54

#### 55 56 57 *Secondary outcomes*

58  
59  
60

1  
2  
3 Different secondary outcomes will be taken into account: (1) duration of symptoms (number of  
4 days until the last day the patient scores 2 in any of the symptoms); (2) duration of moderate-  
5 severe daytime cough (number of days until the last day the patient scores 3 in daytime  
6 cough); (3) duration of moderate-severe nocturnal cough (number of days until the last day  
7 the patient scores 3 in nocturnal cough); (4) duration of cough (number of days until the last  
8 day the patient scores 2 in either daytime or nocturnal cough); (5) duration of severe  
9 symptoms (number of days until the last day the patient scores 5 in any of the symptoms); (6)  
10 duration of moderate-severe symptoms (number of days until the last day the patient scores 3  
11 in any of the symptoms); (7) duration of moderate-severe cough in days according to the basal  
12 degree of bronchial hyper-reactiveness at the baseline visit, measured with peak flow (the  
13 greatest of three determinations will be considered); (8) utilisation of antibiotics and other  
14 symptomatic therapies within the first 4 weeks; (9) duration of work or school absenteeism  
15 due to the episode of acute bronchitis; (10) number of re-attendances to any doctor regarding  
16 the episode of acute bronchitis within the first 4 weeks; (11) number of complications related  
17 to the episode of acute bronchitis within the first 4 weeks, such as pneumonias, visits to  
18 emergency departments, hospital admissions; (12) patient satisfaction; and (13) adverse  
19 reactions.  
20  
21  
22  
23  
24  
25  
26  
27  
28  
29  
30  
31  
32  
33

#### 34 *Withdrawal*

35  
36 Patients will be free to withdraw from the study at any time for any reason without prejudice  
37 to future care, and with no obligation to provide the reason for withdrawal. In addition, the  
38 investigator may withdraw a participant from the trial at any time if deemed necessary by any  
39 of the following reasons: (1) intercurrent process or illness that in the opinion of the  
40 investigator requires the withdrawal of the patient's treatment, (2) the presence of an adverse  
41 event that requires the withdrawal of the patient's treatment, (3) those who require a  
42 concomitant treatment not allowed during study participation (antitussives, anticholinergic  
43 inhalers, honey), or (4) protocol violation.  
44  
45  
46  
47  
48  
49

50 During the trial, patients will be asked to inform about any signs of worsening symptoms, and  
51 investigators will evaluate appropriate measures if they need additional therapy. Since this is a  
52 pragmatic trial, patients who decide interrupting the study drug treatment but want to  
53 continue with the study procedures, will be followed in the same way as the other patients.  
54  
55  
56  
57  
58  
59  
60

#### **Data management and monitoring**

1  
2  
3 The investigators will follow the standard operating procedures of the trial for better quality of  
4 assessment and outcome data collection. The investigators who evaluate outcome measures  
5 should be restricted to only those GPs who have attended the training meetings. All  
6 assessment data and case reports will be collected at baseline (day 1) and at the various  
7 follow-up visits in the intervention arms and control group. Collected documents and data will  
8 be managed by electronic CRF. Only the principal investigator or those who have permission  
9 will be able to access the data. The CRFs and other documents will be stored at a separate and  
10 secure location for 25 years after trial completion. Multicentre clinical trial monitoring will be  
11 conducted via periodic on-site/online visits, and all the patients recruited will be monitored  
12 following a risk approach monitoring plan.  
13  
14  
15  
16  
17  
18  
19  
20  
21  
22

### 23 **Ascertainment of visits**

24 The patients will be randomised to one of the 4 treatment strategies. To standardise data  
25 collection, all of the participating GPs will be trained by the coordinating centre. The patients  
26 will receive information on the study, and if they are interested in participating, they will be  
27 provided with an informed consent form to read and sign. A maximum length of 10-15 minutes  
28 is expected for the interview, randomisation and the introduction of the data. The study  
29 scheme and the visit program will be explained to the patient (Table 1). After randomisation,  
30 information on the strategy to which they have been allocated will be given to the participants,  
31 and they will be given the free study medication and will be informed as to the appropriate  
32 measures to take in case of worsening or no improvement of their condition. In addition, they  
33 will be given a diary to be completed by themselves on a daily basis. The information collected  
34 in the diary includes: times in which study medication is taken, concomitant treatments used  
35 and a questionnaire of symptoms, which has been previously used in other studies [33].  
36 Patients will complete the diary while symptoms related to the respiratory condition are  
37 present.  
38  
39  
40  
41  
42  
43  
44  
45  
46  
47

48 GPs will call patients 2 to 3 days after their inclusion in the study to monitor their progress and  
49 resolve possible doubts regarding the completion of the diary. Patients will be scheduled for a  
50 second visit at day 15 (two weeks after the patient inclusion) to evaluate their clinical  
51 evolution. Depending on the patient's clinical evolution, the follow-up will be different: (1)  
52 clinical cure, defined as absence of symptoms; the diary will be collected and they will be  
53 called two weeks later to check if they have sought medical advice again due to the episode of  
54 acute bronchitis; (2) clinical improvement, defined as the persistence of symptoms but with  
55  
56  
57  
58  
59  
60

1  
2  
3 improvement with respect to the index visit. Patients will be given a new symptom diary to be  
4 completed in the following 14 days and will be asked to return at day 29 to evaluate their  
5 condition. Participating GPs may prescribe any of the medications allowed by the study  
6 protocol, the same treatment as that which was previously received by the patient, or nothing  
7 if not necessary. If the doctor deems it necessary to prescribe any of the therapies under study  
8 (with the exception of the arm in which the patient is located), the patient will discontinue the  
9 trial and follow the usual clinical practice; (3) failure, when the patient is worse or presents the  
10 same symptoms as those presented at the index visit; patients will be withdrawn from the  
11 study and will be managed according to the clinician's best judgement. At day 29, patients who  
12 improved at day 15 will be similarly categorised as (1) clinical cure; (2) improvement; or (3)  
13 failure. Patients with clinical cure or improvement will be contacted again at day 43 (six weeks  
14 after the baseline visit) to record if they have consulted with a professional regarding the  
15 episode of cough and to assess safety (Figure 1).  
16  
17  
18  
19  
20  
21  
22  
23  
24  
25  
26  
27

### 28 **Statistical analysis**

29  
30 The characteristics of the study population will be described using frequencies for categorical  
31 variables and mean and standard deviation for quantitative variables. To compare the  
32 different strategies with the usual treatment, we will use the chi-square tests for categorical  
33 variables and the Student t-test and variance analysis for continuous variables. Efficacy  
34 evaluation will be primarily based on intention-to-treat (ITT) analysis in such a way that any  
35 event in any patient will be included in the group to which the patient was randomised, and  
36 per protocol (PP) analysis will be used as a secondary analysis. ITT analysis will be conducted in  
37 all subjects randomised, and PP analysis will be conducted in those who completed the entire  
38 trial without violating the protocol. The efficacy of each treatment with respect to the usual  
39 clinical practice, the average of days with moderate-severe cough will be measured by means  
40 of a multiple regression model. The effect of the treatment will be adjusted for other variables  
41 that are considered relevant (clinically or statistically) in the evolution of the symptom. In  
42 addition to multiple regression models, time to event (mild cough) will be analysed through  
43 Cox proportional risk survival analysis, reporting both crude and adjusted relative risk. For all  
44 analyses the level of significance will be 0.05.  
45  
46  
47  
48  
49  
50  
51  
52  
53  
54  
55  
56  
57

### 58 **Patient and public involvement**

59  
60

1  
2  
3 Patients and the public are not actively involved in the process of this study. However, the  
4 participants will be informed of the study results at the end of the trial.  
5  
6  
7  
8

## 9 **ETHICS AND DISSEMINATION**

### 10 **Ethical issues**

11  
12 The trial will be conducted in accordance with the Declaration of Helsinki and Good Clinical  
13 Practice guidelines and Consolidated Standards of Reporting Trials guidelines. If the protocol  
14 needs relevant modifications, the investigators are required to inform the institutional review  
15 board (IDIAP Jordi Gol, Barcelona, Spain) and the Spanish Agency of Medicines and Healthcare  
16 Products (AEMPS) as well as participants and receive reapproval. Before the trial, investigators  
17 are required to provide all information related to the clinical trial to every patient, including  
18 the possible benefits and harms, other therapeutic choices and right to withdraw, via a written  
19 consent form approved by the institutional review board. After being provided with enough  
20 time and opportunity to ask questions and decide whether or not to participate, written  
21 informed consent will be obtained from all participants before study inclusion. Data  
22 confidentiality will be ensured at all times, as stated in the researcher's commitment sheet, as  
23 will compliance with the current legislation regarding the protection of personal data. This is a  
24 clinical trial based on the outpatient setting, and neither patients nor researchers will receive  
25 any monetary compensation. The trial has been registered with the National Institutes of  
26 Health (NIH) trial registry (NCT03738917).  
27  
28  
29  
30  
31  
32  
33  
34  
35  
36  
37  
38  
39  
40

### 41 **Adverse events and serious adverse events**

42  
43 This is a low intervention clinical trial meaning that the drugs administered are used in  
44 accordance with the terms of the marketing authorisation with a well-known safety profile and  
45 that the intervention on the patient poses no additional risk to the subject compared to usual  
46 clinical practice. The study medications used in this clinical trial have been widely prescribed  
47 and consumed for a long time, and the safety profile of these drugs is well-documented.  
48  
49

50  
51 Adverse events will be recorded and followed if they are found to be serious (SAEs) or/and  
52 related to the study drug (AR). The occurrence of this kind of adverse events will be monitored.  
53  
54 The rest of the adverse events will be treated as they are during the normal clinical practice,  
55 but will not be collected in the CRF.  
56  
57  
58  
59  
60



## Dissemination

A range of dissemination activities are planned at national and international conferences. At the end of the trial, we will publish the final report in an open access peer-review journal even in the case of negative results, and the study results will also be disseminated via conference presentations. A summary of the findings will be sent to the participating practices on completion of the AB4T study, and the participants will also be informed of the results.

## DISCUSSION

Acute bronchitis is the most common respiratory tract infection seen in outpatient departments as approximately 5% of the general population develop this infectious condition. Despite problems associated with antibiotic overuse in Western countries and the substantial economic burden associated with acute bronchitis, currently no definitive medication is recommended. There are many studies exploring the efficacy of symptomatic therapies, but different systematic reviews evaluating the effectiveness of antitussives, bronchodilators, herbs and natural remedies found that there was insufficient evidence to support the use of these treatments because of the high risk of bias, small sample sizes and the heterogeneity of the patients included in these studies as many of these patients had an infection other than acute bronchitis. This study is a multicentre, pragmatic, parallel group, open randomised placebo-controlled trial to evaluate the efficacy and safety of usual care plus three different symptomatic treatments that are widely consumed by patients with acute cough due to an uncomplicated lower respiratory tract infection in a rigorous and adequately powered study.

There are some limitations to this protocol. A microbiological study is not carried out, but since nearly 90% of the episodes of acute bronchitis are of viral aetiology, treatment with antibiotics is not indicated and the microbiological study is therefore not necessary, similar to the usual practice in primary care, in which this procedure is not routinely performed. In addition, the study is pragmatic and replicates current primary care. It is an open and unblinded study, in which doctors and patients will know the randomised study treatment assigned. The main objective of this study, as well as some of the secondary objectives are based on information provided by the patients themselves in the symptom diaries. However, at the baseline visit, GPs will be encouraged to explain how to fill in the diaries and will supervise how patients register the symptom diary. They will ask patients to return them at the various follow-up visits (days 15 and 29). We have previously found that the diary return rate is greater if we make patients come to follow-up visits. Notwithstanding, in the case of patients not returning the

1  
2  
3 diaries, the doctor will contact them by phone to complete a short form in which the main  
4 study variables will be collected, in an attempt to minimise the number of losses.  
5  
6  
7  
8

### 9 **Contributors**

10  
11 JMC, AGS, RM and CL drafted the research protocol and both AGS and CL wrote the  
12 manuscript. AM, AGS, RM, AG, and CL were involved in the protocol development. JMC, AM,  
13 JP, MPA, CB, and CL will be involved in trial conduct and recruitment. DO contributed to the  
14 statistical design and analysis. All authors have contributed to the conception of this clinical  
15 trial.  
16  
17  
18  
19

### 20 **Funding**

21  
22 The AB4T study received a research grant from the Carlos III Institute of Health (ISCIII), Ministry  
23 of Economy and Competitiveness (Spain), awarded on the 2017 call under the Health Strategy  
24 Action 2013-2016, within the National Research Program oriented to Societal Challenges,  
25 within the Technical, Scientific and Innovation Research National Plan 2013-2016, with  
26 reference PI17/01345, co-funded with European Union ERDF funds (European Regional  
27 Development Fund).  
28  
29

30  
31 This study is also supported by the Spanish Clinical Research Network (SCReN), funded by  
32 ISCIII-Subdirección General de Evaluación y Fomento de la Investigación, project number  
33 PT17/0017/0005, within the National Research Program I+D+I 2013-2016 and co-funded with  
34 European Union ERDF funds (European Regional Development Fund).  
35  
36  
37  
38  
39  
40  
41  
42  
43  
44

### 45 **Competing interests**

46 AM and CL report receiving research grants from Abbott Diagnostics. The other authors have  
47 nothing to declare.  
48  
49  
50  
51

### 52 **Patient consent**

53  
54 Obtained.  
55  
56  
57  
58

### 59 **REFERENCES**

1. Woodhead M, Blasi F, Ewig S, et al; Joint Taskforce of the European Respiratory Society and European Society for Clinical Microbiology and Infectious Diseases. Guidelines for the management of adult lower respiratory tract infections - full version. *Clin Microbiol Infect* 2011;17(Suppl.6):E1-E59.
2. Macfarlane J, Holmes W, Gard P, et al. Prospective study of the incidence, aetiology and outcome of adult lower respiratory tract illness in the community. *Thorax* 2001;56:109-14.
3. Albert RH. Diagnosis and treatment of acute bronchitis. *Am Fam Physician* 2010;82:1345-50.
4. Tackett KL, Atkins A. Evidence-based acute bronchitis therapy. *J Pharm Pract* 2012;25:586-90.
5. Chalmers JD, Hill AT. Investigation of "non-responding" presumed lower respiratory tract infection in primary care. *BMJ* 2011;343:d5840.
6. Smith SM, Fahey T, Smucny J, Becker LA. Antibiotics for acute bronchitis. *Cochrane Database Syst Rev* 2017;6:CD000245.
7. Hamoen M, Broekhuizen BD, Little P, Melbye H, Coenen S, Goossens H; GRACE clinical study group. Medication use in European primary care patients with lower respiratory tract infection: an observational study. *Br J Gen Pract* 2014;64:e81-91.
8. Smith SM, Schroeder K, Fahey T. Over-the-counter (OTC) medications for acute cough in children and adults in community settings. *Cochrane Database Syst Rev* 2014;11:CD001831.
9. Morice A, Abdul-Manap R. Drug treatments for coughs and colds. *Prescriber* 1998;9:74-9.
10. Llor C, Moragas A, Bayona C, et al. Efficacy of anti-inflammatory or antibiotic treatment in patients with non-complicated acute bronchitis and discoloured sputum: randomised placebo controlled trial. *BMJ* 2013;347:f5762.
11. Little P, Moore M, Kelly J, et al; PIPS Investigators. Ibuprofen, paracetamol, and steam for patients with respiratory tract infections in primary care: pragmatic randomised factorial trial. *BMJ* 2013;347:f6041.
12. El-Gohary M, Hay AD, Coventry P, Moore M, Stuart B, Little P. Corticosteroids for acute and subacute cough following respiratory tract infection: a systematic review. *Fam Pract* 2013;30:492-500.
13. Björnsdóttir I, Einarson TR, Guðmundsson LS, Einarsdóttir RA. Efficacy of diphenhydramine against cough in humans: a review. *Pharm World Sci* 2007;29:577-83.
14. Yale SH, Liu K. Echinacea purpurea therapy for the treatment of the common cold: a randomized, double-blind, placebo-controlled clinical trial. *Arch Intern Med* 2004;164:1237-41.

15. Timmer A, Günther J, Motschall E, Rücker G, Antes G, Kern WV. Pelargonium sidoides extract for treating acute respiratory tract infections. *Cochrane Database Syst Rev* 2013;10:CD006323.
16. Jiang L, Li K, Wu T. Chinese medicinal herbs for acute bronchitis. *Cochrane Database Syst Rev* 2012;2:CD004560.
17. Holzinger F, Chenot JF. Systematic review of clinical trials assessing the effectiveness of ivy leaf (*hedera helix*) for acute upper respiratory tract infections. *Evid Based Complement Alternat Med* 2011;2011:1–9.
18. Parvez L, Vaidya M, Sakhardande A, Subburaj S, Rajagopalan TG. Evaluation of antitussive agents in man. *Pulm Pharmacol* 1996;9:299-308.
19. Pavesi L, Subburaj S, Porter-Shaw K.. Application and validation of a computerized cough acquisition system for objective monitoring of acute cough: a meta-analysis. *Chest* 2001;120:1121-8.
20. Freestone C, Eccles R. Assessment of the antitussive efficacy of codeine in cough associated with common cold. *J Pharm Pharmacol* 1997;49:1045-9.
21. Paul IM, Yoder KE, Crowell KR, et al. Effect of dextromethorphan, diphenhydramine, and placebo on nocturnal cough and sleep quality for coughing children and their parents. *Pediatrics* 2004;114:e85-e90.
22. Korppi M, Laurikainen K, Pietikainen M, Silvasti M. Antitussives in the treatment of acute transient cough in children. *Acta Paediatr Scand* 1991;80:969-71.
23. Braman SS. Chronic cough due to acute bronchitis: ACCP evidence-based clinical practice guidelines. *Chest* 2006;129:95S-103S.
24. Melbye H, Kongerud J, Vorland L. Reversible airflow limitation in adults with respiratory infection. *Eur Respir J* 1994;7:1239-45.
25. Becker LA, Hom J, Villasis-Keever M, van der Wouden JC. Beta2-agonists for acute cough or a clinical diagnosis of acute bronchitis. *Cochrane Database Syst Rev* 2015;9:CD001726.
26. Melbye H, Aasebø U, Straume B. Symptomatic effect of inhaled fenoterol in acute bronchitis: a placebo-controlled double-blind study. *Fam Pract* 1991;8:216-22.
27. Higenbottam TW. Anticholinergics and cough. *Postgrad Med J* 1987;63(Suppl 1):75-8.
28. Zanasi A, Lecchi M, del Forno M, et al. A randomized placebo-controlled, double-blind trial on the management of post-infective cough by inhaled ipratropium and salbutamol administered in combination. *Pulm Pharmacol Ther* 2014;29:224-32.
29. Coulson FR, Fryer AD. Muscarinic acetylcholine receptors and airway diseases. *Pharmacol Ther* 2003;98:59-69.

- 1  
2  
3 30. Wang K, Birring SS, Taylor K, et al. Montelukast for post-infectious cough in adults: a  
4 double-blind randomised placebo-controlled trial. *Lancet Respir Med* 2014;2:35-43.  
5  
6 31. Cayley WE. Beta2 agonists for acute cough or a clinical diagnosis of acute bronchitis. *Am*  
7 *Fam Physician* 2017;95:551.  
8  
9 32. Oduwole O, Udoh EE, Oyo-Ita A, Meremikwu MM. Honey for acute cough in children.  
10 *Cochrane Database Syst Rev* 2018;4:CD007094.  
11  
12 33. de la Poza Abad M, Mas Dalmau G, Moreno Bakedano M, et al; Delayed Antibiotic  
13 Prescription (DAP) Group. Prescription strategies in acute uncomplicated respiratory  
14 infections: A randomized clinical trial. *JAMA Intern Med* 2016;176:21-9.  
15  
16  
17  
18  
19  
20  
21  
22  
23  
24  
25  
26  
27  
28  
29  
30  
31  
32  
33  
34  
35  
36  
37  
38  
39  
40  
41  
42  
43  
44  
45  
46  
47  
48  
49  
50  
51  
52  
53  
54  
55  
56  
57  
58  
59  
60

**Table 1. Timetable of study period.**

| Day                                                                                                                 | Day 1   | Day 2-4       | Day 15  | Day 29 <sup>a</sup> |               | Day 43 <sup>b</sup> |
|---------------------------------------------------------------------------------------------------------------------|---------|---------------|---------|---------------------|---------------|---------------------|
| Visit                                                                                                               | Visit 1 | Phone visit 1 | Visit 2 | Visit 3             | Phone visit 2 | Phone visit 3       |
| Visit at the centre                                                                                                 | X       |               | X       | X <sup>c</sup>      |               |                     |
| Medical history and physical examination                                                                            | X       |               |         |                     |               |                     |
| Explanation of the study and informed consent                                                                       | X       |               |         |                     |               |                     |
| Initial CRF                                                                                                         | X       |               |         |                     |               |                     |
| Randomisation                                                                                                       | X       |               |         |                     |               |                     |
| Dispensing the study treatment                                                                                      | X       |               |         |                     |               |                     |
| Peak flow determination                                                                                             | X       |               |         |                     |               |                     |
| Giving out of the first symptom diary, up to day 15                                                                 | X       |               |         |                     |               |                     |
| Assessment of the clinical outcome                                                                                  |         | X             | X       | X                   | X             | X                   |
| Adherence to the study drug                                                                                         |         | X             | X       |                     |               |                     |
| Evaluation of adverse events                                                                                        |         | X             | X       | X                   | X             | X                   |
| Collection of the first symptom diary and giving out of the second symptom diary from day 16 to day 29 <sup>d</sup> |         |               | X       |                     |               |                     |
| Collection of the second symptom diary                                                                              |         |               |         | X                   |               |                     |
| Evaluation of re-attendance to healthcare services due to infectious condition                                      |         | X             | X       | X                   | X             | X                   |

|                             |  |   |   |   |   |   |
|-----------------------------|--|---|---|---|---|---|
| Evaluation of complications |  | X | X | X | X | X |
|-----------------------------|--|---|---|---|---|---|

<sup>a</sup>Final visit if the symptoms have disappeared.

<sup>b</sup>Only if the visit at day 29 is at the centre and a cure or improvement is recorded.

<sup>c</sup>Phone visit if a cure is recorded at day 15.

<sup>d</sup>Only if the patient still has symptoms of infection (improvement).

For peer review only

1  
2  
3  
4  
5  
6  
7  
8  
9  
10  
11  
12  
13  
14  
15  
16  
17  
18  
19  
20  
21  
22  
23  
24  
25  
26  
27  
28  
29  
30  
31  
32  
33  
34  
35  
36  
37  
38  
39  
40  
41

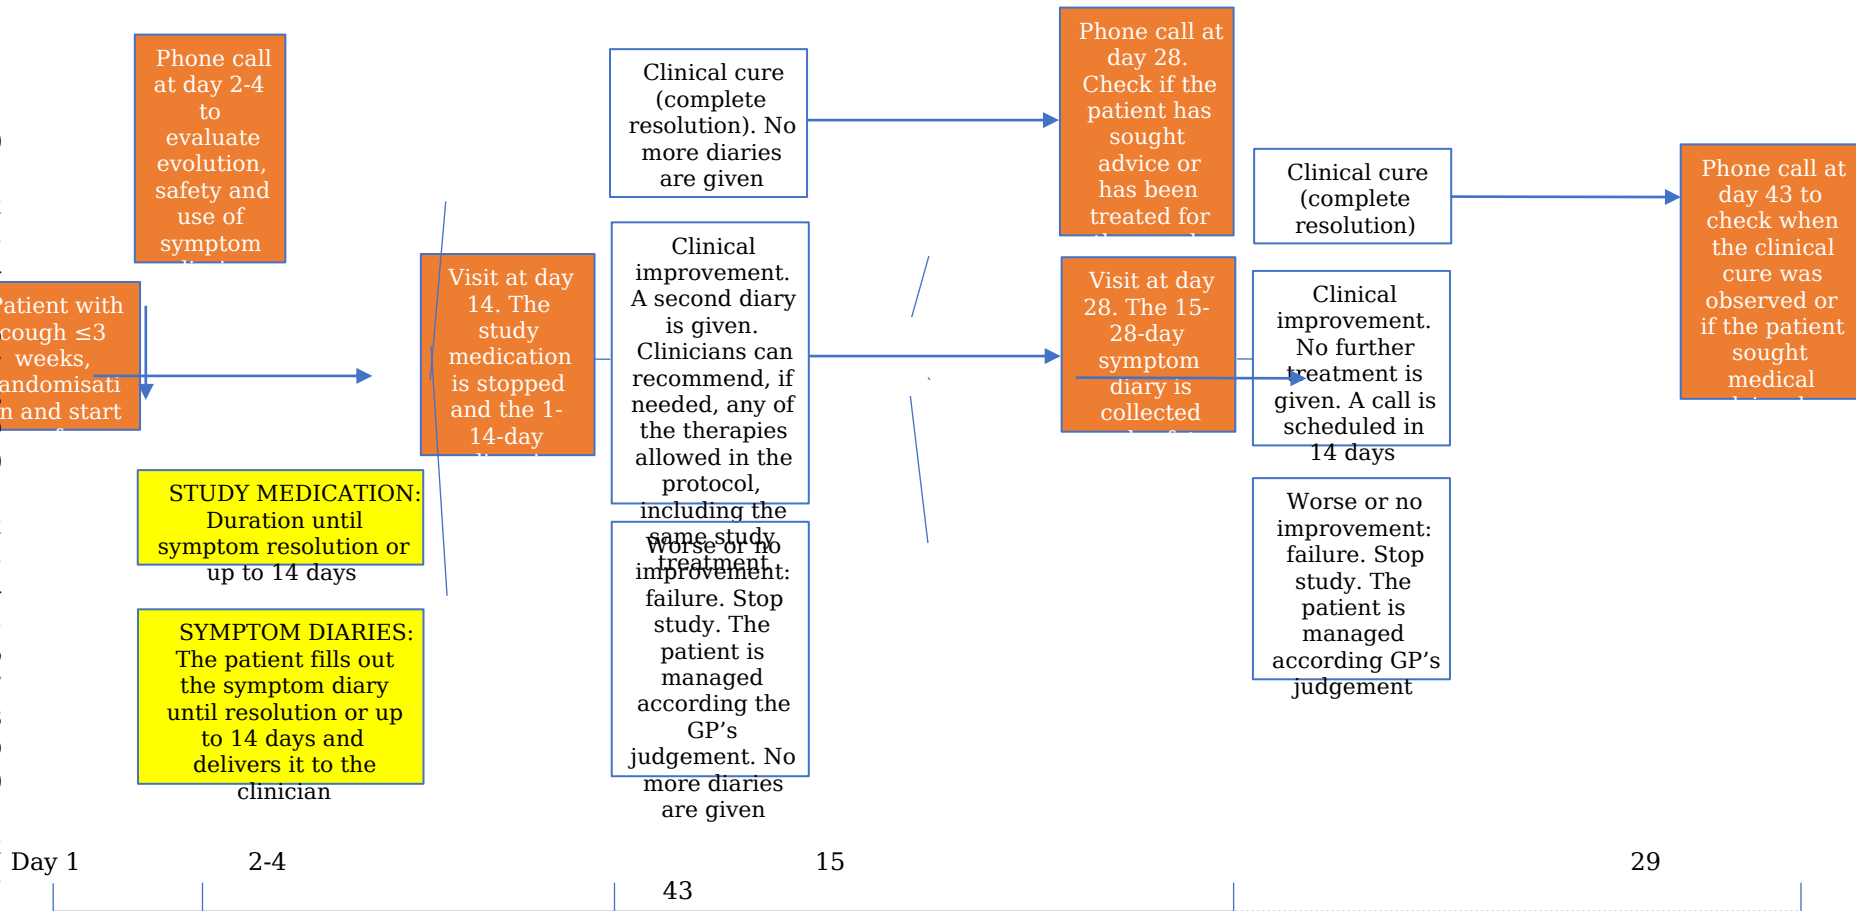



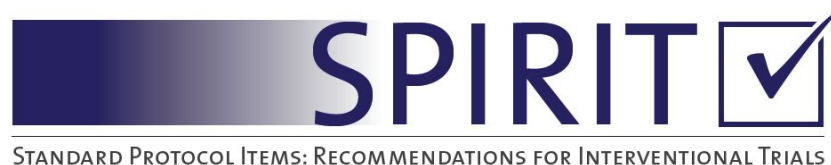

SPIRIT 2013 Checklist: Recommended items to address in a clinical trial protocol and related documents\*

| Section/item                      | Item No | Description                                                                                                                                                                                                                                                                              | Addressed on page number |
|-----------------------------------|---------|------------------------------------------------------------------------------------------------------------------------------------------------------------------------------------------------------------------------------------------------------------------------------------------|--------------------------|
| <b>Administrative information</b> |         |                                                                                                                                                                                                                                                                                          |                          |
| Title                             | 1       | Descriptive title identifying the study design, population, interventions, and, if applicable, trial acronym                                                                                                                                                                             | ___ 1 ___                |
| Trial registration                | 2a      | Trial identifier and registry name. If not yet registered, name of intended registry                                                                                                                                                                                                     | ___ 3 ___                |
|                                   | 2b      | All items from the World Health Organization Trial Registration Data Set                                                                                                                                                                                                                 | ___ NA ___               |
| Protocol version                  | 3       | Date and version identifier                                                                                                                                                                                                                                                              | ___ 1 ___                |
| Funding                           | 4       | Sources and types of financial, material, and other support                                                                                                                                                                                                                              | ___ 16 ___               |
| Roles and responsibilities        | 5a      | Names, affiliations, and roles of protocol contributors                                                                                                                                                                                                                                  | ___ 16 ___               |
|                                   | 5b      | Name and contact information for the trial sponsor                                                                                                                                                                                                                                       | ___ 16 ___               |
|                                   | 5c      | Role of study sponsor and funders, if any, in study design; collection, management, analysis, and interpretation of data; writing of the report; and the decision to submit the report for publication, including whether they will have ultimate authority over any of these activities | ___ 16 ___               |
|                                   | 5d      | Composition, roles, and responsibilities of the coordinating centre, steering committee, endpoint adjudication committee, data management team, and other individuals or groups overseeing the trial, if applicable (see Item 21a for data monitoring committee)                         | ___ 16 ___               |

1 **Introduction**

2

3 Background and rationale 6a Description of research question and justification for undertaking the trial, including summary of relevant studies (published and unpublished) examining benefits and harms for each intervention \_\_\_\_\_4-7\_\_\_\_\_

4

5

6 6b Explanation for choice of comparators \_\_\_\_\_4-7\_\_\_\_\_

7

8 Objectives 7 Specific objectives or hypotheses \_\_\_\_\_7\_\_\_\_\_

9

10 Trial design 8 Description of trial design including type of trial (eg, parallel group, crossover, factorial, single group), allocation ratio, and framework (eg, superiority, equivalence, noninferiority, exploratory) \_\_\_\_\_7,8\_\_\_\_\_

11

12

13

14 **Methods: Participants, interventions, and outcomes**

15

16 Study setting 9 Description of study settings (eg, community clinic, academic hospital) and list of countries where data will be collected. Reference to where list of study sites can be obtained \_\_\_\_\_7\_\_\_\_\_

17

18

19 Eligibility criteria 10 Inclusion and exclusion criteria for participants. If applicable, eligibility criteria for study centres and individuals who will perform the interventions (eg, surgeons, psychotherapists) \_\_\_\_\_7,8\_\_\_\_\_

20

21

22 Interventions 11a Interventions for each group with sufficient detail to allow replication, including how and when they will be administered \_\_\_\_\_8\_\_\_\_\_

23

24

25 11b Criteria for discontinuing or modifying allocated interventions for a given trial participant (eg, drug dose change in response to harms, participant request, or improving/worsening disease) \_\_\_\_\_11\_\_\_\_\_

26

27

28 11c Strategies to improve adherence to intervention protocols, and any procedures for monitoring adherence (eg, drug tablet return, laboratory tests) \_\_\_\_\_12\_\_\_\_\_

29

30

31 11d Relevant concomitant care and interventions that are permitted or prohibited during the trial \_\_\_\_\_13, Fig.1\_\_\_\_\_

32

33

34 Outcomes 12 Primary, secondary, and other outcomes, including the specific measurement variable (eg, systolic blood pressure), analysis metric (eg, change from baseline, final value, time to event), method of aggregation (eg, median, proportion), and time point for each outcome. Explanation of the clinical relevance of chosen efficacy and harm outcomes is strongly recommended \_\_\_\_\_10,11\_\_\_\_\_

35

36

37

38

39

40 Participant timeline 13 Time schedule of enrolment, interventions (including any run-ins and washouts), assessments, and visits for participants. A schematic diagram is highly recommended (see Figure) \_\_\_\_\_12,13\_\_\_\_\_

41

42

43

44

45

46

|    |                                                                     |     |                                                                                                                                                                                                                                                                                                                                                                                                              |                        |
|----|---------------------------------------------------------------------|-----|--------------------------------------------------------------------------------------------------------------------------------------------------------------------------------------------------------------------------------------------------------------------------------------------------------------------------------------------------------------------------------------------------------------|------------------------|
| 1  | Sample size                                                         | 14  | Estimated number of participants needed to achieve study objectives and how it was determined, including clinical and statistical assumptions supporting any sample size calculations                                                                                                                                                                                                                        | _____8_____            |
| 2  |                                                                     |     |                                                                                                                                                                                                                                                                                                                                                                                                              |                        |
| 3  |                                                                     |     |                                                                                                                                                                                                                                                                                                                                                                                                              |                        |
| 4  | Recruitment                                                         | 15  | Strategies for achieving adequate participant enrolment to reach target sample size                                                                                                                                                                                                                                                                                                                          | _____8_____            |
| 5  |                                                                     |     |                                                                                                                                                                                                                                                                                                                                                                                                              |                        |
| 6  |                                                                     |     |                                                                                                                                                                                                                                                                                                                                                                                                              |                        |
| 7  | <b>Methods: Assignment of interventions (for controlled trials)</b> |     |                                                                                                                                                                                                                                                                                                                                                                                                              |                        |
| 8  | Allocation:                                                         |     |                                                                                                                                                                                                                                                                                                                                                                                                              |                        |
| 9  |                                                                     |     |                                                                                                                                                                                                                                                                                                                                                                                                              |                        |
| 10 | Sequence                                                            | 16a | Method of generating the allocation sequence (eg, computer-generated random numbers), and list of any factors for stratification. To reduce predictability of a random sequence, details of any planned restriction (eg, blocking) should be provided in a separate document that is unavailable to those who enrol participants or assign interventions                                                     | _____10_____           |
| 11 | generation                                                          |     |                                                                                                                                                                                                                                                                                                                                                                                                              |                        |
| 12 |                                                                     |     |                                                                                                                                                                                                                                                                                                                                                                                                              |                        |
| 13 |                                                                     |     |                                                                                                                                                                                                                                                                                                                                                                                                              |                        |
| 14 |                                                                     |     |                                                                                                                                                                                                                                                                                                                                                                                                              |                        |
| 15 |                                                                     |     |                                                                                                                                                                                                                                                                                                                                                                                                              |                        |
| 16 | Allocation                                                          | 16b | Mechanism of implementing the allocation sequence (eg, central telephone; sequentially numbered, opaque, sealed envelopes), describing any steps to conceal the sequence until interventions are assigned                                                                                                                                                                                                    | _____10_____           |
| 17 | concealment                                                         |     |                                                                                                                                                                                                                                                                                                                                                                                                              |                        |
| 18 | mechanism                                                           |     |                                                                                                                                                                                                                                                                                                                                                                                                              |                        |
| 19 |                                                                     |     |                                                                                                                                                                                                                                                                                                                                                                                                              |                        |
| 20 | Implementation                                                      | 16c | Who will generate the allocation sequence, who will enrol participants, and who will assign participants to interventions                                                                                                                                                                                                                                                                                    | _____10_____           |
| 21 |                                                                     |     |                                                                                                                                                                                                                                                                                                                                                                                                              |                        |
| 22 |                                                                     |     |                                                                                                                                                                                                                                                                                                                                                                                                              |                        |
| 23 |                                                                     |     |                                                                                                                                                                                                                                                                                                                                                                                                              |                        |
| 24 | Blinding (masking)                                                  | 17a | Who will be blinded after assignment to interventions (eg, trial participants, care providers, outcome assessors, data analysts), and how                                                                                                                                                                                                                                                                    | _____10_____           |
| 25 |                                                                     |     |                                                                                                                                                                                                                                                                                                                                                                                                              |                        |
| 26 |                                                                     |     |                                                                                                                                                                                                                                                                                                                                                                                                              |                        |
| 27 |                                                                     | 17b | If blinded, circumstances under which unblinding is permissible, and procedure for revealing a participant's allocated intervention during the trial                                                                                                                                                                                                                                                         | _____Not blinded_____  |
| 28 |                                                                     |     |                                                                                                                                                                                                                                                                                                                                                                                                              |                        |
| 29 |                                                                     |     |                                                                                                                                                                                                                                                                                                                                                                                                              |                        |
| 30 |                                                                     |     |                                                                                                                                                                                                                                                                                                                                                                                                              |                        |
| 31 | <b>Methods: Data collection, management, and analysis</b>           |     |                                                                                                                                                                                                                                                                                                                                                                                                              |                        |
| 32 |                                                                     |     |                                                                                                                                                                                                                                                                                                                                                                                                              |                        |
| 33 | Data collection                                                     | 18a | Plans for assessment and collection of outcome, baseline, and other trial data, including any related processes to promote data quality (eg, duplicate measurements, training of assessors) and a description of study instruments (eg, questionnaires, laboratory tests) along with their reliability and validity, if known. Reference to where data collection forms can be found, if not in the protocol | _____11,12_____        |
| 34 | methods                                                             |     |                                                                                                                                                                                                                                                                                                                                                                                                              |                        |
| 35 |                                                                     |     |                                                                                                                                                                                                                                                                                                                                                                                                              |                        |
| 36 |                                                                     |     |                                                                                                                                                                                                                                                                                                                                                                                                              |                        |
| 37 |                                                                     |     |                                                                                                                                                                                                                                                                                                                                                                                                              |                        |
| 38 |                                                                     |     |                                                                                                                                                                                                                                                                                                                                                                                                              |                        |
| 39 |                                                                     | 18b | Plans to promote participant retention and complete follow-up, including list of any outcome data to be collected for participants who discontinue or deviate from intervention protocols                                                                                                                                                                                                                    | _____12,13,table1_____ |
| 40 |                                                                     |     |                                                                                                                                                                                                                                                                                                                                                                                                              |                        |
| 41 |                                                                     |     |                                                                                                                                                                                                                                                                                                                                                                                                              |                        |
| 42 |                                                                     |     |                                                                                                                                                                                                                                                                                                                                                                                                              |                        |
| 43 |                                                                     |     |                                                                                                                                                                                                                                                                                                                                                                                                              |                        |
| 44 |                                                                     |     |                                                                                                                                                                                                                                                                                                                                                                                                              |                        |
| 45 |                                                                     |     |                                                                                                                                                                                                                                                                                                                                                                                                              |                        |
| 46 |                                                                     |     |                                                                                                                                                                                                                                                                                                                                                                                                              |                        |

|    |                                 |     |                                                                                                                                                                                                                                                                                                                                       |             |
|----|---------------------------------|-----|---------------------------------------------------------------------------------------------------------------------------------------------------------------------------------------------------------------------------------------------------------------------------------------------------------------------------------------|-------------|
| 1  | Data management                 | 19  | Plans for data entry, coding, security, and storage, including any related processes to promote data quality (eg, double data entry; range checks for data values). Reference to where details of data management procedures can be found, if not in the protocol                                                                     | ___13,14___ |
| 2  |                                 |     |                                                                                                                                                                                                                                                                                                                                       |             |
| 3  |                                 |     |                                                                                                                                                                                                                                                                                                                                       |             |
| 4  |                                 |     |                                                                                                                                                                                                                                                                                                                                       |             |
| 5  | Statistical methods             | 20a | Statistical methods for analysing primary and secondary outcomes. Reference to where other details of the statistical analysis plan can be found, if not in the protocol                                                                                                                                                              | ___13___    |
| 6  |                                 |     |                                                                                                                                                                                                                                                                                                                                       |             |
| 7  |                                 |     |                                                                                                                                                                                                                                                                                                                                       |             |
| 8  |                                 | 20b | Methods for any additional analyses (eg, subgroup and adjusted analyses)                                                                                                                                                                                                                                                              | ___13___    |
| 9  |                                 |     |                                                                                                                                                                                                                                                                                                                                       |             |
| 10 |                                 | 20c | Definition of analysis population relating to protocol non-adherence (eg, as randomised analysis), and any statistical methods to handle missing data (eg, multiple imputation)                                                                                                                                                       | ___13___    |
| 11 |                                 |     |                                                                                                                                                                                                                                                                                                                                       |             |
| 12 |                                 |     |                                                                                                                                                                                                                                                                                                                                       |             |
| 13 |                                 |     |                                                                                                                                                                                                                                                                                                                                       |             |
| 14 | <b>Methods: Monitoring</b>      |     |                                                                                                                                                                                                                                                                                                                                       |             |
| 15 |                                 |     |                                                                                                                                                                                                                                                                                                                                       |             |
| 16 | Data monitoring                 | 21a | Composition of data monitoring committee (DMC); summary of its role and reporting structure; statement of whether it is independent from the sponsor and competing interests; and reference to where further details about its charter can be found, if not in the protocol. Alternatively, an explanation of why a DMC is not needed | ___14___    |
| 17 |                                 |     |                                                                                                                                                                                                                                                                                                                                       |             |
| 18 |                                 |     |                                                                                                                                                                                                                                                                                                                                       |             |
| 19 |                                 |     |                                                                                                                                                                                                                                                                                                                                       |             |
| 20 |                                 |     |                                                                                                                                                                                                                                                                                                                                       |             |
| 21 |                                 |     |                                                                                                                                                                                                                                                                                                                                       |             |
| 22 |                                 | 21b | Description of any interim analyses and stopping guidelines, including who will have access to these interim results and make the final decision to terminate the trial                                                                                                                                                               | ___NA___    |
| 23 |                                 |     |                                                                                                                                                                                                                                                                                                                                       |             |
| 24 |                                 |     |                                                                                                                                                                                                                                                                                                                                       |             |
| 25 | Harms                           | 22  | Plans for collecting, assessing, reporting, and managing solicited and spontaneously reported adverse events and other unintended effects of trial interventions or trial conduct                                                                                                                                                     | ___14___    |
| 26 |                                 |     |                                                                                                                                                                                                                                                                                                                                       |             |
| 27 |                                 |     |                                                                                                                                                                                                                                                                                                                                       |             |
| 28 | Auditing                        | 23  | Frequency and procedures for auditing trial conduct, if any, and whether the process will be independent from investigators and the sponsor                                                                                                                                                                                           | ___14___    |
| 29 |                                 |     |                                                                                                                                                                                                                                                                                                                                       |             |
| 30 |                                 |     |                                                                                                                                                                                                                                                                                                                                       |             |
| 31 |                                 |     |                                                                                                                                                                                                                                                                                                                                       |             |
| 32 | <b>Ethics and dissemination</b> |     |                                                                                                                                                                                                                                                                                                                                       |             |
| 33 |                                 |     |                                                                                                                                                                                                                                                                                                                                       |             |
| 34 | Research ethics approval        | 24  | Plans for seeking research ethics committee/institutional review board (REC/IRB) approval                                                                                                                                                                                                                                             | ___Done___  |
| 35 |                                 |     |                                                                                                                                                                                                                                                                                                                                       |             |
| 36 |                                 |     |                                                                                                                                                                                                                                                                                                                                       |             |
| 37 | Protocol amendments             | 25  | Plans for communicating important protocol modifications (eg, changes to eligibility criteria, outcomes, analyses) to relevant parties (eg, investigators, REC/IRBs, trial participants, trial registries, journals, regulators)                                                                                                      | ___15___    |
| 38 |                                 |     |                                                                                                                                                                                                                                                                                                                                       |             |
| 39 |                                 |     |                                                                                                                                                                                                                                                                                                                                       |             |
| 40 |                                 |     |                                                                                                                                                                                                                                                                                                                                       |             |
| 41 |                                 |     |                                                                                                                                                                                                                                                                                                                                       |             |
| 42 |                                 |     |                                                                                                                                                                                                                                                                                                                                       |             |
| 43 |                                 |     |                                                                                                                                                                                                                                                                                                                                       |             |
| 44 |                                 |     |                                                                                                                                                                                                                                                                                                                                       |             |
| 45 |                                 |     |                                                                                                                                                                                                                                                                                                                                       |             |
| 46 |                                 |     |                                                                                                                                                                                                                                                                                                                                       |             |

|    |                               |     |                                                                                                                                                                                                                                                                                     |                        |
|----|-------------------------------|-----|-------------------------------------------------------------------------------------------------------------------------------------------------------------------------------------------------------------------------------------------------------------------------------------|------------------------|
| 1  | Consent or assent             | 26a | Who will obtain informed consent or assent from potential trial participants or authorised surrogates, and how (see Item 32)                                                                                                                                                        | ___ 14 ___             |
| 2  |                               |     |                                                                                                                                                                                                                                                                                     |                        |
| 3  |                               |     |                                                                                                                                                                                                                                                                                     |                        |
| 4  |                               | 26b | Additional consent provisions for collection and use of participant data and biological specimens in ancillary studies, if applicable                                                                                                                                               | ___ Not applicable ___ |
| 5  |                               |     |                                                                                                                                                                                                                                                                                     |                        |
| 6  |                               |     |                                                                                                                                                                                                                                                                                     |                        |
| 7  | Confidentiality               | 27  | How personal information about potential and enrolled participants will be collected, shared, and maintained in order to protect confidentiality before, during, and after the trial                                                                                                | ___ 14 ___             |
| 8  |                               |     |                                                                                                                                                                                                                                                                                     |                        |
| 9  |                               |     |                                                                                                                                                                                                                                                                                     |                        |
| 10 | Declaration of interests      | 28  | Financial and other competing interests for principal investigators for the overall trial and each study site                                                                                                                                                                       | ___ 16 ___             |
| 11 |                               |     |                                                                                                                                                                                                                                                                                     |                        |
| 12 |                               |     |                                                                                                                                                                                                                                                                                     |                        |
| 13 | Access to data                | 29  | Statement of who will have access to the final trial dataset, and disclosure of contractual agreements that limit such access for investigators                                                                                                                                     | ___ 14 ___             |
| 14 |                               |     |                                                                                                                                                                                                                                                                                     |                        |
| 15 |                               |     |                                                                                                                                                                                                                                                                                     |                        |
| 16 |                               |     |                                                                                                                                                                                                                                                                                     |                        |
| 17 | Ancillary and post-trial care | 30  | Provisions, if any, for ancillary and post-trial care, and for compensation to those who suffer harm from trial participation                                                                                                                                                       | ___ 13 ___             |
| 18 |                               |     |                                                                                                                                                                                                                                                                                     |                        |
| 19 |                               |     |                                                                                                                                                                                                                                                                                     |                        |
| 20 | Dissemination policy          | 31a | Plans for investigators and sponsor to communicate trial results to participants, healthcare professionals, the public, and other relevant groups (eg, via publication, reporting in results databases, or other data sharing arrangements), including any publication restrictions | ___ 15 ___             |
| 21 |                               |     |                                                                                                                                                                                                                                                                                     |                        |
| 22 |                               |     |                                                                                                                                                                                                                                                                                     |                        |
| 23 |                               |     |                                                                                                                                                                                                                                                                                     |                        |
| 24 |                               | 31b | Authorship eligibility guidelines and any intended use of professional writers                                                                                                                                                                                                      | ___ Not applicable ___ |
| 25 |                               |     |                                                                                                                                                                                                                                                                                     |                        |
| 26 |                               | 31c | Plans, if any, for granting public access to the full protocol, participant-level dataset, and statistical code                                                                                                                                                                     | ___ No ___             |
| 27 |                               |     |                                                                                                                                                                                                                                                                                     |                        |
| 28 |                               |     |                                                                                                                                                                                                                                                                                     |                        |
| 29 | <b>Appendices</b>             |     |                                                                                                                                                                                                                                                                                     |                        |
| 30 |                               |     |                                                                                                                                                                                                                                                                                     |                        |
| 31 | Informed consent materials    | 32  | Model consent form and other related documentation given to participants and authorised surrogates                                                                                                                                                                                  | ___ Appendix ___       |
| 32 |                               |     |                                                                                                                                                                                                                                                                                     |                        |
| 33 |                               |     |                                                                                                                                                                                                                                                                                     |                        |
| 34 | Biological specimens          | 33  | Plans for collection, laboratory evaluation, and storage of biological specimens for genetic or molecular analysis in the current trial and for future use in ancillary studies, if applicable                                                                                      | ___ Not applicable ___ |
| 35 |                               |     |                                                                                                                                                                                                                                                                                     |                        |
| 36 |                               |     |                                                                                                                                                                                                                                                                                     |                        |

37 \*It is strongly recommended that this checklist be read in conjunction with the SPIRIT 2013 Explanation & Elaboration for important clarification on the items.  
 38 Amendments to the protocol should be tracked and dated. The SPIRIT checklist is copyrighted by the SPIRIT Group under the Creative Commons  
 39 "[Attribution-NonCommercial-NoDerivs 3.0 Unported](https://creativecommons.org/licenses/by-nc-nd/3.0/)" license.  
 40  
 41  
 42

# BMJ Open

## Effectiveness of antitussives, anticholinergics and honey versus usual care in adults with uncomplicated acute bronchitis: A study protocol of an open randomized clinical trial in primary care.

|                                 |                                                                                                                                                                                                                                                                                                                                                                                                                                                                                                                                                                                                                                                                                                                                                                                                                                                                                                                                                                                                                                                                                                                                                                                                                                                                                                                                           |
|---------------------------------|-------------------------------------------------------------------------------------------------------------------------------------------------------------------------------------------------------------------------------------------------------------------------------------------------------------------------------------------------------------------------------------------------------------------------------------------------------------------------------------------------------------------------------------------------------------------------------------------------------------------------------------------------------------------------------------------------------------------------------------------------------------------------------------------------------------------------------------------------------------------------------------------------------------------------------------------------------------------------------------------------------------------------------------------------------------------------------------------------------------------------------------------------------------------------------------------------------------------------------------------------------------------------------------------------------------------------------------------|
| Journal:                        | <i>BMJ Open</i>                                                                                                                                                                                                                                                                                                                                                                                                                                                                                                                                                                                                                                                                                                                                                                                                                                                                                                                                                                                                                                                                                                                                                                                                                                                                                                                           |
| Manuscript ID                   | bmjopen-2018-028159.R1                                                                                                                                                                                                                                                                                                                                                                                                                                                                                                                                                                                                                                                                                                                                                                                                                                                                                                                                                                                                                                                                                                                                                                                                                                                                                                                    |
| Article Type:                   | Protocol                                                                                                                                                                                                                                                                                                                                                                                                                                                                                                                                                                                                                                                                                                                                                                                                                                                                                                                                                                                                                                                                                                                                                                                                                                                                                                                                  |
| Date Submitted by the Author:   | 18-Feb-2019                                                                                                                                                                                                                                                                                                                                                                                                                                                                                                                                                                                                                                                                                                                                                                                                                                                                                                                                                                                                                                                                                                                                                                                                                                                                                                                               |
| Complete List of Authors:       | Cots, Josep M.; Universitat de Barcelona, Primary Healthcare Centre La Marina, Barcelona, Spain<br>Moragas, Ana; Universitat Rovira i Virgili, Primary Healthcare Centre Jaume I, Tarragona, Spain<br>García-Sangenís, Ana; Institut Universitari d'Investigació en Atenció Primària Jordi Gol (IDIAP Jordi Gol), Medicines Research Unit; Plataforma SCReN, UICEC IDIAP Jordi Gol<br>Morros, Rosa; Institut Universitari d'Investigació en Atenció Primària Jordi Gol (IDIAP Jordi Gol), Medicines Research Unit; Universitat Autònoma de Barcelona, Departament de Farmacologia i Terapèutica<br>Gomez, Ainhoa; Institut Universitari d'Investigació en Atenció Primària Jordi Gol (IDIAP Jordi Gol), Medicines Research Unit Barcelona, ES<br>Ouchi, Dan; Institut Universitari d'Investigació en Atenció Primària (IDIAP) Jordi Gol<br>Monfà, Ramon ; Institut Universitari d'Investigació en Atenció Primària (IDIAP) Jordi Gol<br>Pera, Helena; Institut Universitari d'Investigació en Atenció Primària Jordi Gol (IDIAP Jordi Gol), Medicines Research Unit; Plataforma SCReN, UICEC IDIAP Jordi Gol<br>Pujol, Jesus; Balaguer Health Centre, Balaguer<br>Bayona, Carolina; Primary Healthcare Centre La Marina de la Poza, Mariam; Institut Català de la Salut<br>Llor, Carl; Primary healthcare centre Barcelona-2B (Via Roma), |
| <b>Primary Subject Heading</b>: | Infectious diseases                                                                                                                                                                                                                                                                                                                                                                                                                                                                                                                                                                                                                                                                                                                                                                                                                                                                                                                                                                                                                                                                                                                                                                                                                                                                                                                       |
| Secondary Subject Heading:      | General practice / Family practice, Infectious diseases, Respiratory medicine                                                                                                                                                                                                                                                                                                                                                                                                                                                                                                                                                                                                                                                                                                                                                                                                                                                                                                                                                                                                                                                                                                                                                                                                                                                             |
| Keywords:                       | INFECTIOUS DISEASES, THERAPEUTICS, Respiratory infections < THORACIC MEDICINE                                                                                                                                                                                                                                                                                                                                                                                                                                                                                                                                                                                                                                                                                                                                                                                                                                                                                                                                                                                                                                                                                                                                                                                                                                                             |
|                                 |                                                                                                                                                                                                                                                                                                                                                                                                                                                                                                                                                                                                                                                                                                                                                                                                                                                                                                                                                                                                                                                                                                                                                                                                                                                                                                                                           |

1  
2  
3  
4  
5  
6  
7  
8  
9  
10  
11  
12  
13  
14  
15  
16  
17  
18  
19  
20  
21  
22  
23  
24  
25  
26  
27  
28  
29  
30  
31  
32  
33  
34  
35  
36  
37  
38  
39  
40  
41  
42  
43  
44  
45  
46  
47  
48  
49  
50  
51  
52  
53  
54  
55  
56  
57  
58  
59  
60

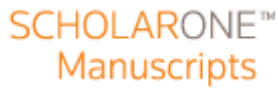

**Title**

Effectiveness of antitussives, anticholinergics and honey versus usual care in adults with uncomplicated acute bronchitis: a study protocol of an open randomized clinical trial in primary care.

**Authors**

Josep M. Cots, GP<sup>1</sup>; Ana Moragas, GP<sup>2</sup>; Anna García-Sangenís, monitor<sup>3,4,5</sup>; Rosa Morros, pharmacist<sup>3,4,5</sup>; Ainhoa Gómez-Lumbreras, pharmacist<sup>3,4,5</sup>; Dan Ouchi, statistician<sup>3</sup>; Ramon Monfà, monitor<sup>3,4,5</sup>; Helena Pera<sup>3,4,5</sup>; Jesus Pujol, GP<sup>6</sup>; Carolina Bayona, GP<sup>2</sup>; Mariam de la Poza-Abad, GP<sup>7</sup>; Carl Llor, GP<sup>3,8</sup>

<sup>1</sup>La Marina Health Centre, Barcelona, Spain

<sup>2</sup>Jaume I Health Centre, Tarragona, Spain

<sup>3</sup>Institut Universitari d'Investigació en Atenció Primària (IDIAP) Jordi Gol, Barcelona, Spain

<sup>4</sup>Universitat Autònoma de Barcelona, Bellaterra, Spain

<sup>5</sup>Unidad de Investigación Clínica y Ensayos Clínicos = Plataforma ScREN, Spain

<sup>6</sup>Balaguer Health Centre, Balaguer, Spain

<sup>7</sup>Carrer del Foc Health Centre, Barcelona, Spain

<sup>8</sup>Via Roma Health Centre, Barcelona, Spain

**Corresponding author**

Carl Llor

Via Roma Primary Health Centre

c. Manso 19, 3rd floor

08015 Barcelona, Spain

Email: [carles.llor@gmail.com](mailto:carles.llor@gmail.com)



**ABSTRACT**

**Introduction:** Despite the frequent use of therapies in acute bronchitis, the evidence of their benefit is lacking, since only a few clinical trials have been published, with low sample sizes, poor methodological quality and mainly in children. The objective of this study is to compare the effectiveness of 3 symptomatic therapies (dextromethorphan, ipratropium and honey) associated with usual care and the usual care in adults with acute bronchitis.

**Methods and analysis:** This will be a multicentre, pragmatic, parallel group, open randomised trial. Patients aged 18 or over with uncomplicated acute bronchitis, with cough for less than three weeks as the main symptom, scoring  $\geq 4$  in either daytime or nocturnal cough on a 7-point Likert scale, will be randomised to one of the following four groups: usual care, dextromethorphan 30 mg t.i.d., ipratropium bromide inhaler 20  $\mu\text{g}$  2 puffs t.i.d, or 30 mg (a spoonful) of honey t.i.d., all taken for up to 14 days. The exclusion criteria will be pneumonia, criteria for hospital admission, pregnancy or lactation, concomitant pulmonary disease, associated significant comorbidity, allergy, intolerance or contraindication to any of the study drugs or admitted to a long-term residence. Sample: 668 patients. The primary outcome will be the number of days with moderate-severe cough. All patients will be given a paper-based symptom diary to be self-administered. A second visit will be scheduled at day 2-3 for assessing evolution, with two more visits at days 15 and 29 for clinical assessment, evaluation of adverse effects, re-attendance and complications. Patients still with symptoms at day 29 will be called six weeks after the baseline visit.

**Ethics and dissemination:** The study has been approved by the Ethical Board of IDIAP Jordi Gol (reference number: AC18/002). The findings of this trial will be disseminated through research conferences and peer-review journals.

**Trial registration number:** NCT03738917.

### STRENGTHS AND LIMITATIONS OF THIS STUDY

- Since this is a pragmatic clinical trial evaluating the effectiveness of different symptomatic therapies, masking techniques will not be used.
- A microbiological study will not be carried out as most cases of acute bronchitis have a viral aetiology, and sputum samples are not routinely collected in the primary care setting.
- The main objective as well as some of the secondary objectives of the study are based on information provided by the patients themselves in the symptom diaries. However, clinicians will encourage patients to fill them out appropriately and return them at the different follow-up visits scheduled.
- Since one quarter of patients with uncomplicated acute bronchitis still have cough after the first month, these patients will be followed and called two weeks later.

## BACKGROUND

Lower respiratory tract infections are common conditions in primary care. These infections affect approximately 5% of adults per year, and although they occur throughout the year, the incidence is higher in the autumn and winter [1]. The most frequent of these infections is acute bronchitis, which is a self-limiting infection of the lower airways that is characterized by clinical manifestations of cough with or without sputum and the absence of symptoms or signs of pneumonia. Other symptoms associated with acute bronchitis include fatigue, wheezing, headache, myalgias, hoarseness, and general discomfort [2]. As there are no specific diagnostic criteria for acute bronchitis, the diagnosis is primarily clinical and requires thorough assessment for differentiation from pneumonia, as well as other upper respiratory tract infections such as the common cold or sore throat [3]. However, cough is not the prominent symptom in the latter infections. Conversely, cough constitutes the most prominent manifestation of acute bronchitis and lasts an average of 3 weeks, but may persist for more than 1 month in 25% of the patients [4]. Initially, the cough is non-productive, but after about a week there is an increase in mucus production, and in the second week, the colour of the sputum often changes from grey-white to purulent. Despite being a self-limiting condition, most patients with acute bronchitis seek medical advice, mainly because of bothersome cough [5].

Treatment of acute bronchitis is usually symptomatic and is aimed at relieving annoying respiratory symptoms. Treatment should include good hand hygiene, increased fluid intake, avoidance of smoking and the elimination of environmental cough triggers (for instance, dust), and the use of vapours, particularly in low-humidity environments, mainly if symptoms include nasal stuffiness and nasal discharge. Many general practitioners (GP) prescribe antibiotics, despite evidence of little or no benefit, since up to 90% of acute bronchitis are of viral aetiology, thereby contributing to the emergence of bacterial resistance [6].

There are many approaches to the treatment of cough, including analgesics, non-steroidal anti-inflammatory drugs (NSAIDs), expectorants, mucolytics, antihistamines, decongestants, as well as antitussives,  $\beta$ 2-agonists or other bronchodilators, alternative therapies and natural treatment [3]. In general, these therapies are available as over-the-counter medicines in many countries, and their use is very widespread, particularly in southern European countries. In a recent observational study conducted in 12 European areas, Catalonia was one of the zones with the highest consumption of mucolytics, bronchodilators and antitussives [7].

1  
2  
3 According to the guidelines of the European Respiratory Society, acute cough can be treated  
4 with dextromethorphan or codeine, but mucolytics, antihistamines and bronchodilators should  
5 not be prescribed in acute lower respiratory tract infections [1]. The reviews carried out so far  
6 conclude that the benefit of these therapies is lacking. In general, the studies performed had  
7 small sample sizes and methodological flaws that make their comparison difficult [8]. It should  
8 be considered that over-the-counter preparations contain different drugs with a variety of  
9 modes of action that can make them difficult to compare [9]. Most clinicians recommend the  
10 use of analgesics to alleviate mainly fever, headache, myalgia, and chest pain. NSAIDs are also  
11 frequently prescribed in patients with lower respiratory infections, mainly for relieving cough.  
12 However, two recent randomised clinical trials have shown that the number of days with  
13 cough among patients taking NSAIDs is not significantly lower than placebo [10,11]. Some trials  
14 with inhaled corticosteroids have also shown a very marginal benefit, but the number of  
15 patients included in these studies was small [12]. The clinical efficacy of other symptomatic  
16 drugs is also questionable. For example, trials assessing the effect of expectorants and  
17 mucolytics have not shown favourable effects on cough associated with acute bronchitis [8].  
18 Despite being widely used, antihistamines have been evaluated primarily in the common cold  
19 and were not found to be beneficial to alleviate the symptoms of cough [13]. Studies assessing  
20 the benefits of *Echinacea*, Chinese herbs, *Pelargonium sidoides*, ivy leaf extracts and other  
21 herbal treatments have obtained contradictory results, mainly in patients with common cold,  
22 with low quality of evidence and some problems related to safety, and therefore, they are not  
23 recommended in patients with acute bronchitis [14-17].

24  
25  
26  
27  
28  
29  
30  
31  
32  
33  
34  
35  
36  
37  
38  
39 Most studies that have assessed the benefit of antitussives in adults, mainly codeine and  
40 dextromethorphan, have been performed in patients with acute cough in the context of upper  
41 airway infections, thus limiting the external validity to patients with acute bronchitis. The  
42 benefit of dextromethorphan in acute bronchitis is controversial. A review published by Parvez  
43 *et al.*, including 451 adults, found that a single dose of 30 mg of dextromethorphan reduced  
44 the number of cough bouts measured with a microphone by between 19% and 36% within the  
45 first 3 hours compared with placebo [18], but a meta-analysis of six studies in adults with  
46 upper airway infections found that a single dose of dextromethorphan was slightly more  
47 effective than placebo in terms of intensity, effort and latency within the first three hours after  
48 intake (between 12 and 17% more effective), although the clinical relevance of this  
49 observation is unclear [19]. Studies carried out with codeine in adults with acute bronchitis  
50 have not been shown to be beneficial [20]. In children, dextromethorphan has not proven to  
51 be more effective than placebo [21]. In a Scandinavian study conducted in 50 children followed  
52  
53  
54  
55  
56  
57  
58  
59  
60

1  
2  
3 for 3 days, the average cough score was slightly lower than placebo, although statistically  
4 significant differences were not observed between those taking the antitussive and those  
5 assigned to placebo [22]. Despite this, some guidelines recommend a short course of  
6 antitussives to reduce severe cough during acute illness in adults and children over the age of  
7 six, but evidence related to their effectiveness remains unclear [23].  
8  
9

10  
11  
12 A non-negligible percentage of patients with acute bronchitis present exaggerated bronchial  
13 responsiveness, which is mainly reported when the infection is caused by viruses and atypical  
14 germs [24]. However, a recent review does not support the routine use of  $\beta$ 2-adrenergic  
15 inhalers in patients with acute bronchitis [25]. On the other hand, in one of the clinical trials  
16 included in this review a significant improvement in symptom scores was observed in adults  
17 who received fenoterol 0.2 mg q.i.d for 7 days when there was bronchial hyper-reactiveness,  
18 wheezing or a decrease in FEV<sub>1</sub> compared to the same group of patients who had received  
19 placebo. This effect, however, was not observed among patients not presenting airflow  
20 obstruction [26]. This same effect has been described with inhaled anticholinergics, such as  
21 ipratropium and tiotropium alone or associated with  $\beta$ 2-agonists, but these studies were  
22 primarily conducted in patients with cough due to upper airway infections [27,28]. The release  
23 of acetylcholine in the airways by parasympathetic stimulation could trigger hyper-  
24 reactivity and increase mucosal secretion on the walls of the airways, and this might explain  
25 the possible antitussive properties of inhaled anticholinergic drugs [29]. Other drugs such as  
26 leukotriene inhibitors have not shown to be useful in acute cough [30]. Despite all these  
27 limitations, the guidelines recommend that bronchodilators can only be used in patients with  
28 bronchial hyper-reactiveness, outweighing the adverse effects, such as tremors or  
29 nervousness, that these drugs can cause [31].  
30  
31

32  
33  
34 In recent years, some studies using honey in children have found favourable results on the  
35 frequency of cough, patient quality of life and the quality of sleep of both parents and children.  
36 In a recent meta-analysis, including six clinical trials and a total of nearly 900 children, honey  
37 alleviated cough symptoms compared with no treatment or diphenhydramine, but was not  
38 found to be more effective than dextromethorphan. Apart from the limitations of the small  
39 sample sizes of these studies, most children received active treatment (different types of  
40 honey depending on the studies) for only one night, and studies evaluating their use in adult  
41 population are lacking [32]. There is no clear evidence that some types of honey have superior  
42 antimicrobial properties to others as described in some papers [33,34].  
43  
44

45  
46  
47 Therefore, we believe that this clinical trial is justified, since evidence of the benefit of these  
48 treatments in adults with acute bronchitis, with cough as a predominant symptom, is unclear.  
49  
50  
51  
52  
53  
54  
55  
56  
57  
58  
59  
60

1  
2  
3 We prioritize the use of dextromethorphan, as this antitussive is recommended by clinical  
4 guidelines at the usual dose of 15 mg t.i.d in the adult population, and ipratropium bromide  
5 inhalers, since the majority of studies carried out so far have considered  $\beta$ 2-agonists, with very  
6 poor results on effectiveness, and the fact that anticholinergics are frequently used in primary  
7 care in our country. In our study, we want to evaluate the effectiveness of honey at the  
8 recommended dose of 30 g t.i.d. in the adult population, since their benefit has only been  
9 explored in paediatrics. Unlike most published studies, these treatments will be recommended  
10 for a maximum of 14 days, because as discussed earlier the average duration of symptoms  
11 with cough due to acute bronchitis is 3 weeks.  
12  
13  
14  
15  
16  
17  
18  
19  
20

## 21 **OBJECTIVES**

22  
23 The main aim of the trial is to evaluate the clinical effectiveness of adding 3 symptomatic  
24 treatments (dextromethorphan, ipratropium bromide or honey) to usual care in reducing days  
25 with moderate-severe cough compared to usual care. The secondary objectives are aimed at  
26 evaluating the clinical effectiveness of adding 3 symptomatic treatments to usual care  
27 compared to usual care in the reduction of days: (1) with cough; (2) with moderate-severe  
28 daytime cough; (3) with moderate-severe nocturnal cough; (4) severe or moderate symptoms;  
29 (5) severe symptoms: (6) until the complete resolution of symptoms; (7) according to the  
30 baseline degree of bronchial hyper-reactiveness measured with peak-flow; and also (8) to  
31 evaluate the utilisation of antibiotics and different symptomatic treatments in the four arms;  
32 (9) to evaluate the number of days of absence from work in the four study arms; (10) to assess  
33 the number of times patients re-attend for symptoms related to the episode of acute  
34 bronchitis; (11) to assess the number of complications related to the episode of acute  
35 bronchitis; (12) to assess patient satisfaction in the four study arms; and (13) to assess the  
36 number of adverse events in the four study arms.  
37  
38  
39  
40  
41  
42  
43  
44  
45  
46  
47  
48

## 49 **METHODS AND ANALYSIS**

### 50 **Trial design**

51  
52 This study is a phase IV, multicentre, pragmatic, parallel group, open randomised trial.  
53  
54  
55  
56  
57

### 58 **Study arms**

1  
2  
3 Once the patients are included in the trial, they will be randomised into one of the 4 treatment  
4 groups: (1) usual clinical practice group: (2) usual clinical practice + dextromethorphan (15 mg  
5 unit), one 15 mg-tablet t.i.d. up to a maximum of 14 days; (3) usual clinical practice +  
6 ipratropium bromide (20 µg each puff), 2 puffs t.i.d. up to a maximum of 14 days; and (4) usual  
7 clinical practice + 30 g of honey (one tablespoon) t.i.d. up to a maximum of 14 days; two 750  
8 mg bottles of wildflower honey (the most frequent type of honey used in our country) will be  
9 provided and patients will be recommended to add the honey to a cup of lemon or thyme  
10 juice, milk herbal tea, yogurt, herbal teas, etc. All the drugs and products used in this study are  
11 already marketed, and therefore, the manufacturers are responsible for the elaboration and  
12 control of samples. The study drugs will be provided free to the participants by the sponsor.  
13 The provision, secondary conditioning and distribution of the study drugs and products will be  
14 performed by the Barcelona Primary Care Pharmacy service. All the study drugs as well as the  
15 honey will be kept at room temperature. To improve compliance, participants will be asked to  
16 record their daily dosage in the symptom diary.  
17  
18  
19  
20  
21  
22  
23  
24  
25  
26  
27  
28

### 29 **Sample size**

30  
31 For the sample size calculation, a recent publication about delayed antibiotic prescribing  
32 carried out in Spain using the same symptom diaries with specific data from the group of  
33 patients with acute bronchitis has been considered, from which an average duration of 5.5  
34 days of moderate to severe cough was obtained, with a standard deviation of 4.5 days [35].  
35 Considering a reduction of 1.5 days as a clinically relevant outcome, a sample of 167 patients  
36 per group is estimated (a total of 668). The power to detect the difference was assumed to be  
37 0.8, with a two-sided significance level of 0.05. The allocation ratio of subjects into the groups  
38 is 1:1:1:1. We expect a 15% of loss to follow-up. Calculations have been performed with the  
39 aid of GRANMO software, version 7.12 April 2012  
40 (<https://www.imim.cat/ofertadeserveis/software-public/granmo/>).  
41  
42  
43  
44  
45  
46  
47  
48  
49  
50

### 51 **Recruitment**

52  
53 The trial will be conducted in different primary care centres in Catalonia, Spain. A large  
54 geographical area of practices throughout Catalonia will be invited to participate to maximise  
55 the generalisability of the sample of adults with uncomplicated acute bronchitis and to avoid  
56 saturation of research studies in some practices. The recruiting GPs will commence the study  
57 in January 2019 and will attempt to recruit all eligible patients until October 2020. Provided  
58  
59  
60

1  
2  
3 the necessary sample is met before this date, the recruitment period will end at the time of  
4 the inclusion of the last patient. The sponsor reserves the right to prematurely discontinue this  
5 trial at any time in case (1) the expected inclusion objectives are not met or (2) new  
6 information appears regarding the efficacy or safety of any of the study medications that could  
7 significantly affect the continuation of the trial or overrules the previous positive evaluation of  
8 the benefit-risk ratio.  
9  
10  
11  
12  
13  
14  
15

## 16 **Participants**

### 17 *Inclusion criteria*

18  
19  
20 Potential participants who meet the following criteria will be included in this trial: (1) age 18  
21 years or older, (2) symptoms of acute bronchitis, defined as an acute lower-respiratory-tract  
22 infection with cough as the predominant symptom, starting within 3 weeks before study  
23 inclusion, (3) patients who score  $\geq 4$  in either the daytime and/or nocturnal cough on a 7-point  
24 Likert scale, and (4) patients who consent to participate.  
25  
26  
27  
28  
29  
30

### 31 *Exclusion criteria*

32  
33 Patients with any of the following criteria will be excluded from this trial: (1) suspected  
34 pneumonia; if the professional suspects pneumonia, a chest X-ray will be recommended and  
35 the patient will be randomised if this diagnosis is discarded; (2) criteria for hospital admission  
36 (impaired consciousness, respiratory rate  $> 30$  breaths/minute, pulse  $> 125$  beats/minute,  
37 systolic blood pressure  $< 90$  mm Hg or diastolic blood pressure  $< 60$  mm Hg, temperature  $> 40^{\circ}\text{C}$   
38 or oxygen saturation  $< 92\%$ ); (3) pregnancy or breast feeding; (4) baseline respiratory disease  
39 such as chronic obstructive pulmonary disease, asthma, tuberculosis or bronchiectasis; (5)  
40 associated significant comorbidity, such as moderate-severe heart failure, dementia, acute  
41 myocardial infarction/recent cerebral vascular accident ( $< 3$  months), severe liver failure,  
42 severe renal failure: (6) immunosuppression, such as chronic infection by HIV, transplanted,  
43 neutropenic, or patients receiving immunosuppressive treatment; (7) active neoplasm; (8)  
44 terminal illness; (9) history of intolerance or allergy to any of the study treatments; (10)  
45 patients in whom, in the opinion of the investigator, treatment with dextromethorphan,  
46 ipratropium bromide or honey is contraindicated; (11) patients living in long-term institutions;  
47 (12) difficulty in conducting scheduled follow-up visits.  
48  
49  
50  
51  
52  
53  
54  
55  
56  
57  
58  
59  
60



1  
2  
3 Following the usual clinical practice, participating GPs may prescribe the concomitant therapy  
4 they consider appropriate, including analgesics such as NSAIDs or paracetamol, mucolytics,  
5 expectorants, antihistamines and also antibiotics. However, they will not be allowed to  
6 prescribe antitussives, including codeine, anticholinergic inhalers and they will not be allowed  
7 to recommend the use of honey, including honey candies, tablets or infusions with honey. All  
8 drug information (name of product, purpose of administration, dosage, duration of  
9 administration, etc) will be recorded on the patient case report form (CRF) and patients will fill  
10 out any other treatment they obtain or purchase from the pharmacy in their symptom diaries.  
11  
12  
13  
14  
15  
16  
17  
18

### 19 **Randomisation**

20  
21 Patients will be assigned sequentially as they enter the study. Randomisation of patients will  
22 be performed by registering the patient in an electronic CRF during the index visit. Patients will  
23 be stratified based on the previous duration of symptoms ( $\leq 1$  week;  $> 1$  week). Once a patient  
24 is included in the trial and the randomisation has been centrally made, the investigator will  
25 provide the assigned treatment and record the dispensing and medication code in the  
26 electronic CRF. Since this is a multicentre study, a block procedure will be performed to assign  
27 patients to each of the health centres at a 1:1:1:1 ratio.  
28  
29  
30  
31  
32  
33  
34  
35

### 36 **Blinding**

37  
38 This is an open study. Neither physicians nor patients will be blind to the patient's assignment  
39 to the study group. The open nature of the clinical trial ensures that the results obtained in this  
40 study are very close to the reality of primary care, considering that both the participating GPs  
41 and the patients with uncomplicated acute bronchitis will be aware of the treatment given.  
42  
43 However, the main outcome will be assessed by the patients themselves.  
44  
45  
46  
47  
48

### 49 **Outcome measures**

#### 50 *Primary outcome*

51  
52 Duration (days) of moderate-severe cough in days. Each symptom will be scored by the patient  
53 on a 7-point Likert scale (0=not affected; 1=very little problem; 2=slight problem;  
54 3=moderately bad; 4=bad; 5=very bad; 6=as bad as it could be). The number of days until the  
55 last day the patient scores 3 in either daytime cough or nocturnal cough in the paper-based  
56  
57  
58  
59  
60

1  
2  
3 symptom diary will be considered for the main outcome. We will use validated questionnaires,  
4 which have also been used in a previous study.  
5  
6  
7

### 8 9 *Secondary outcomes*

10  
11 Different secondary outcomes will be taken into account: (1) duration of symptoms (number of  
12 days until the last day the patient scores 2 in any of the symptoms); (2) duration of moderate-  
13 severe daytime cough (number of days until the last day the patient scores 3 in daytime  
14 cough); (3) duration of moderate-severe nocturnal cough (number of days until the last day  
15 the patient scores 3 in nocturnal cough); (4) duration of cough (number of days until the last  
16 day the patient scores 2 in either daytime or nocturnal cough); (5) duration of severe  
17 symptoms (number of days until the last day the patient scores 5 in any of the symptoms); (6)  
18 duration of moderate-severe symptoms (number of days until the last day the patient scores 3  
19 in any of the symptoms); (7) duration of moderate-severe cough in days according to the basal  
20 degree of bronchial hyper-reactiveness at the baseline visit, measured with peak flow (the  
21 greatest of three determinations will be considered); (8) utilisation of antibiotics and other  
22 symptomatic therapies within the first 4 weeks; (9) duration of work or school absenteeism  
23 due to the episode of acute bronchitis; (10) number of re-attendances to any doctor regarding  
24 the episode of acute bronchitis within the first 4 weeks; (11) number of complications related  
25 to the episode of acute bronchitis within the first 4 weeks, such as pneumonias, visits to  
26 emergency departments, hospital admissions; (12) patient satisfaction; and (13) adverse  
27 reactions.  
28  
29  
30  
31  
32  
33  
34  
35  
36  
37  
38  
39  
40  
41  
42

### 43 *Withdrawal*

44  
45 Patients will be free to withdraw from the study at any time for any reason without prejudice  
46 to future care, and with no obligation to provide the reason for withdrawal. In addition, the  
47 investigator may withdraw a participant from the trial at any time if deemed necessary by any  
48 of the following reasons: (1) intercurrent process or illness that in the opinion of the  
49 investigator requires the withdrawal of the patient's treatment, (2) the presence of an adverse  
50 event that requires the withdrawal of the patient's treatment, (3) those who require a  
51 concomitant treatment not allowed during study participation (antitussives, anticholinergic  
52 inhalers, honey), or (4) protocol violation.  
53  
54  
55  
56  
57

58  
59 During the trial, patients will be asked to inform about any signs of worsening symptoms, and  
60 investigators will evaluate appropriate measures if they need additional therapy. Since this is a

1  
2  
3 pragmatic trial, patients who decide interrupting the study drug treatment but want to  
4 continue with the study procedures, will be followed in the same way as the other patients.  
5  
6  
7  
8

### 9 **Data management and monitoring**

10  
11 The investigators will follow the standard operating procedures of the trial for better quality of  
12 assessment and outcome data collection. The investigators who evaluate outcome measures  
13 should be restricted to only those GPs who have attended the training meetings. All  
14 assessment data and case reports will be collected at baseline (day 1) and at the various  
15 follow-up visits in the intervention arms and control group. Collected documents and data will  
16 be managed by electronic CRF. Only the principal investigator or those who have permission  
17 will be able to access the data. The CRFs and other documents will be stored at a separate and  
18 secure location for 25 years after trial completion. Multicentre clinical trial monitoring will be  
19 conducted via periodic on-site/online visits, and all the patients recruited will be monitored  
20 following a risk approach monitoring plan.  
21  
22  
23  
24  
25  
26  
27  
28  
29  
30

### 31 **Ascertainment of visits**

32  
33 The patients will be randomised to one of the 4 treatment strategies. To standardise data  
34 collection, all of the participating GPs will be trained by the coordinating centre. The patients  
35 will receive information on the study by the participating GPs, and if they are interested in  
36 participating, they will be provided with an informed consent form to read and sign. A  
37 maximum length of 10-15 minutes is expected for the interview, randomisation and the  
38 introduction of the data. The participating GPs will explain the study scheme and the visit  
39 programme to the patient (Table 1). After randomisation, information on the strategy to which  
40 they have been allocated will be given to the participants, and they will be given the free study  
41 medication and will be informed as to the appropriate measures to take in case of worsening  
42 or no improvement of their condition. In addition, they will be given a paper-based diary to be  
43 completed by themselves on a daily basis. The information collected in the diary includes:  
44 times in which study medication is taken, concomitant treatments used and a questionnaire of  
45 symptoms, which has been previously used in other studies [35]. Patients will complete the  
46 diary while symptoms related to the respiratory condition are present.  
47  
48  
49  
50  
51  
52  
53  
54  
55

56  
57 GPs will call patients 2 to 3 days after their inclusion in the study to monitor their progress and  
58 resolve possible doubts regarding the completion of the diary. Patients will be scheduled for a  
59 second visit at day 15 (two weeks after the patient inclusion) to evaluate their clinical  
60

1  
2  
3 evolution. Depending on the patient's clinical evolution, the follow-up will be different: (1)  
4 clinical cure, defined as absence of symptoms; the diary will be collected and they will be  
5 called two weeks later to check if they have sought medical advice again due to the episode of  
6 acute bronchitis; (2) clinical improvement, defined as the persistence of symptoms but with  
7 improvement with respect to the index visit. Patients will be given a new symptom diary to be  
8 completed in the following 14 days and will be asked to return at day 29 to evaluate their  
9 condition. Participating GPs may prescribe any of the medications allowed by the study  
10 protocol, the same treatment as that which was previously received by the patient, or nothing  
11 if not necessary. If the doctor deems it necessary to prescribe any of the therapies under study  
12 (with the exception of the arm in which the patient is located), the patient will discontinue the  
13 trial and follow the usual clinical practice; (3) failure, when the patient is worse or presents the  
14 same symptoms as those presented at the index visit; patients will be withdrawn from the  
15 study and will be managed according to the clinician's best judgement. At day 29, patients who  
16 improved at day 15 will be similarly categorised as (1) clinical cure; (2) improvement; or (3)  
17 failure. Patients with clinical cure or improvement will be contacted again at day 43 (six weeks  
18 after the baseline visit) to record if they have consulted with a professional regarding the  
19 episode of cough and to assess safety (Figure 1).  
20  
21  
22  
23  
24  
25  
26  
27  
28  
29  
30  
31  
32  
33  
34

### 35 **Statistical analysis**

36 The characteristics of the study population will be described using frequencies for categorical  
37 variables and mean and standard deviation for quantitative variables. To compare the  
38 different strategies with the usual treatment, we will use the chi-square tests for categorical  
39 variables and the Student t-test and variance analysis for continuous variables. Effectiveness  
40 evaluation will be primarily based on intention-to-treat (ITT) analysis in such a way that any  
41 event in any patient will be included in the group to which the patient was randomised, and  
42 per protocol (PP) analysis will be used as a secondary analysis. ITT analysis will be conducted in  
43 all subjects randomised, and PP analysis will be conducted in those who complete the entire  
44 trial without violating the protocol.  
45  
46  
47  
48  
49  
50

51 To avoid the effect of potential confounders, the effectiveness of each treatment with respect  
52 to the usual clinical practice will be analysed through Cox proportional risk survival analysis,  
53 reporting both crude and adjusted relative risk. The effect of the treatment will be adjusted for  
54 variables collected at baseline (demographics, previous treatment, initial progression of the  
55 disease...), variables collected during the follow-up (concomitant drug, adherence, adverse  
56  
57  
58  
59  
60

1  
2  
3 events...) and other variables that are considered relevant (clinically or statistically) in the  
4 evolution of the symptoms.  
5

6  
7 Censoring and missing data: Those who discontinue, miss follow-up or, for whatever reason,  
8 are not evaluated for the main variable will be considered censored at the last follow-up date.  
9  
10 In addition, patients who do not show symptoms of improvement along the study will also be  
11 censored at the last day of follow-up. We do not plan to make imputation of missing data.  
12  
13

14 Sub-analysis: To assess the consistency of the data collected by telephone (in subjects not  
15 attending the visit of the 15th and 29th), a sub-analysis will be carried out using only the data  
16 from the diary. A sub-analysis with the patients taking antibiotics will also be studied.  
17  
18

19 All the analyses will be done with the statistical software R (version 3.2 or higher) and the level  
20 of significance will be 0.05.  
21  
22  
23  
24  
25

## 26 **Patient and public involvement**

27  
28 Patients and the public are not actively involved in the process of this study. However, the  
29 participants will be informed of the study results at the end of the trial.  
30  
31  
32  
33

## 34 **ETHICS AND DISSEMINATION**

### 35 **Ethical issues**

36  
37  
38 The trial will be conducted in accordance with the Declaration of Helsinki and Good Clinical  
39 Practice guidelines and Consolidated Standards of Reporting Trials guidelines. If the protocol  
40 needs relevant modifications, the investigators are required to inform the institutional review  
41 board (IDIAP Jordi Gol, Barcelona, Spain) and the Spanish Agency of Medicines and Healthcare  
42 Products (AEMPS) as well as participants and receive reapproval. Before the trial, investigators  
43 are required to provide all information related to the clinical trial to every patient, including  
44 the possible benefits and harms, other therapeutic choices and right to withdraw, via a written  
45 consent form approved by the institutional review board. After being provided with enough  
46 time and opportunity to ask questions and decide whether or not to participate, written  
47 informed consent will be obtained from all participants before study inclusion. Data  
48 confidentiality will be ensured at all times, as stated in the researcher's commitment sheet, as  
49 will compliance with the current legislation regarding the protection of personal data. This is a  
50 clinical trial based on the outpatient setting, and neither patients nor researchers will receive  
51  
52  
53  
54  
55  
56  
57  
58  
59  
60

1  
2  
3 any monetary compensation. The trial has been registered with the National Institutes of  
4 Health (NIH) trial registry (NCT03738917).  
5  
6  
7  
8

### 9 **Adverse events and serious adverse events**

10  
11 This is a low intervention clinical trial meaning that the drugs administered are used in  
12 accordance with the terms of the marketing authorisation with a well-known safety profile and  
13 that the intervention on the patient poses no additional risk to the subject compared to usual  
14 clinical practice. The study medications used in this clinical trial have been widely prescribed  
15 and consumed for a long time, and the safety profile of these drugs is well-documented.  
16  
17  
18

19  
20 Adverse events will be recorded and followed if they are found to be serious (SAEs) or/and  
21 related to the study drug (AR). The occurrence of this kind of adverse events will be monitored.  
22  
23 The rest of the adverse events will be treated as they are during the normal clinical practice,  
24 but will not be collected in the CRF.  
25  
26  
27  
28  
29

### 30 **Dissemination**

31  
32 A range of dissemination activities are planned at national and international conferences. At  
33 the end of the trial, we will publish the final report in an open access peer-review journal even  
34 in the case of negative results, and the study results will also be disseminated via conference  
35 presentations. A summary of the findings will be sent to the participating practices on  
36 completion of the AB4T study, and the participants will also be informed of the results.  
37  
38  
39  
40  
41  
42

### 43 **DISCUSSION**

44  
45 Acute bronchitis is the most common respiratory tract infection seen in outpatient  
46 departments as approximately 5% of the general population develop this infectious condition.  
47  
48 Despite problems associated with antibiotic overuse in Western countries and the substantial  
49 economic burden associated with acute bronchitis, currently no definitive medication is  
50 recommended. There are many studies exploring the efficacy of symptomatic therapies, but  
51 different systematic reviews evaluating the effectiveness of antitussives, bronchodilators,  
52 herbs and natural remedies found that there was insufficient evidence to support the use of  
53 these treatments because of the high risk of bias, small sample sizes and the heterogeneity of  
54 the patients included in these studies as many of these patients had an infection other than  
55 acute bronchitis. This study is a multicentre, pragmatic, parallel group, open randomised  
56  
57  
58  
59  
60

1  
2  
3 placebo-controlled trial to evaluate the efficacy and safety of usual care plus three different  
4 symptomatic treatments that are widely consumed by patients with acute cough due to an  
5 uncomplicated lower respiratory tract infection in a rigorous and adequately powered study.  
6  
7

8  
9 There are some limitations to this protocol. A microbiological study is not carried out, but since  
10 nearly 90% of the episodes of acute bronchitis are of viral aetiology, treatment with antibiotics  
11 is not indicated and the microbiological study is therefore not necessary, similar to the usual  
12 practice in primary care, in which this procedure is not routinely performed. In addition, the  
13 study is pragmatic and replicates current primary care. It is an open and unblinded study, in  
14 which doctors and patients will know the randomised study treatment assigned. The main  
15 objective of this study, as well as some of the secondary objectives are based on information  
16 provided by the patients themselves in the symptom diaries. However, at the baseline visit,  
17 GPs will be encouraged to explain how to fill in the diaries and will supervise how patients  
18 register the symptom diary. They will ask patients to return them at the various follow-up visits  
19 (days 15 and 29). We have previously found that the diary return rate is greater if we make  
20 patients come to follow-up visits. Notwithstanding, in the case of patients not returning the  
21 diaries, the doctor will contact them by phone to complete a short form in which the main  
22 study variables will be collected, in an attempt to minimise the number of losses.  
23  
24  
25  
26  
27  
28  
29  
30  
31  
32  
33  
34

### 35 **Contributors**

36  
37 JMC, AGS, RM and CL drafted the research protocol and both AGS and CL wrote the  
38 manuscript. AM, AGS, RM, HP, AGL, and CL were involved in the protocol development. JMC,  
39 AM, JP, CB, MPA, and CL will be involved in trial conduct and recruitment. DO contributed to  
40 the statistical design and analysis. All authors have contributed to the conception of this  
41 clinical trial.  
42  
43  
44  
45  
46  
47

### 48 **Funding**

49  
50 The AB4T study received a research grant from the Carlos III Institute of Health (ISCIII), Ministry  
51 of Economy and Competitiveness (Spain), awarded on the 2017 call under the Health Strategy  
52 Action 2013-2016, within the National Research Program oriented to Societal Challenges,  
53 within the Technical, Scientific and Innovation Research National Plan 2013-2016, with  
54 reference PI17/01345, co-funded with European Union ERDF funds (European Regional  
55 Development Fund).  
56  
57  
58  
59  
60

1  
2  
3 This study is also supported by the Spanish Clinical Research Network (SCReN), funded by  
4 ISCIII-Subdirección General de Evaluación y Fomento de la Investigación, project number  
5 PT17/0017/0005, within the National Research Program I+D+I 2013-2016 and co-funded with  
6 European Union ERDF funds (European Regional Development Fund).  
7  
8  
9

### 10 11 12 **Competing interests**

13  
14 AM and CL report receiving research grants from Abbott Diagnostics. The other authors have  
15 nothing to declare.  
16  
17

### 18 19 20 **Patient consent**

21  
22 Obtained.  
23  
24  
25

### 26 27 **REFERENCES**

- 28  
29  
30  
31  
32  
33  
34  
35  
36  
37  
38  
39  
40  
41  
42  
43  
44  
45  
46  
47  
48  
49  
50  
51  
52  
53  
54  
55  
56  
57  
58  
59  
60
1. Woodhead M, Blasi F, Ewig S, et al; Joint Taskforce of the European Respiratory Society and European Society for Clinical Microbiology and Infectious Diseases. Guidelines for the management of adult lower respiratory tract infections - full version. *Clin Microbiol Infect* 2011;17(Suppl.6):E1-E59.
  2. Macfarlane J, Holmes W, Gard P, et al. Prospective study of the incidence, aetiology and outcome of adult lower respiratory tract illness in the community. *Thorax* 2001;56:109-14.
  3. Albert RH. Diagnosis and treatment of acute bronchitis. *Am Fam Physician* 2010;82:1345-50.
  4. Tackett KL, Atkins A. Evidence-based acute bronchitis therapy. *J Pharm Pract* 2012;25:586-90.
  5. Chalmers JD, Hill AT. Investigation of “non-responding” presumed lower respiratory tract infection in primary care. *BMJ* 2011;343:d5840.
  6. Smith SM, Fahey T, Smucny J, Becker LA. Antibiotics for acute bronchitis. *Cochrane Database Syst Rev* 2017;6:CD000245.
  7. Hamoen M, Broekhuizen BD, Little P, Melbye H, Coenen S, Goossens H; GRACE clinical study group. Medication use in European primary care patients with lower respiratory tract infection: an observational study. *Br J Gen Pract* 2014;64:e81-91.



- 1
  - 2
  - 3
  - 4
  - 5
  - 6
  - 7
  - 8
  - 9
  - 10
  - 11
  - 12
  - 13
  - 14
  - 15
  - 16
  - 17
  - 18
  - 19
  - 20
  - 21
  - 22
  - 23
  - 24
  - 25
  - 26
  - 27
  - 28
  - 29
  - 30
  - 31
  - 32
  - 33
  - 34
  - 35
  - 36
  - 37
  - 38
  - 39
  - 40
  - 41
  - 42
  - 43
  - 44
  - 45
  - 46
  - 47
  - 48
  - 49
  - 50
  - 51
  - 52
  - 53
  - 54
  - 55
  - 56
  - 57
  - 58
  - 59
  - 60
8. Smith SM, Schroeder K, Fahey T. Over-the-counter (OTC) medications for acute cough in children and adults in community settings. *Cochrane Database Syst Rev* 2014;11:CD001831.
9. Morice A, Abdul-Manap R. Drug treatments for coughs and colds. *Prescriber* 1998;9:74-9.
10. Llor C, Moragas A, Bayona C, et al. Efficacy of anti-inflammatory or antibiotic treatment in patients with non-complicated acute bronchitis and discoloured sputum: randomised placebo controlled trial. *BMJ* 2013;347:f5762.
11. Little P, Moore M, Kelly J, et al; PIPS Investigators. Ibuprofen, paracetamol, and steam for patients with respiratory tract infections in primary care: pragmatic randomised factorial trial. *BMJ* 2013;347:f6041.
12. El-Gohary M, Hay AD, Coventry P, Moore M, Stuart B, Little P. Corticosteroids for acute and subacute cough following respiratory tract infection: a systematic review. *Fam Pract* 2013;30:492-500.
13. Björnsdóttir I, Einarson TR, Guðmundsson LS, Einarsdóttir RA. Efficacy of diphenhydramine against cough in humans: a review. *Pharm World Sci* 2007;29:577-83.
14. Yale SH, Liu K. Echinacea purpurea therapy for the treatment of the common cold: a randomized, double-blind, placebo-controlled clinical trial. *Arch Intern Med* 2004;164:1237-41.
15. Timmer A, Günther J, Motschall E, Rücker G, Antes G, Kern WV. Pelargonium sidoides extract for treating acute respiratory tract infections. *Cochrane Database Syst Rev* 2013;10:CD006323.
16. Jiang L, Li K, Wu T. Chinese medicinal herbs for acute bronchitis. *Cochrane Database Syst Rev* 2012;2:CD004560.
17. Holzinger F, Chenot JF. Systematic review of clinical trials assessing the effectiveness of ivy leaf (*hedera helix*) for acute upper respiratory tract infections. *Evid Based Complement Alternat Med* 2011;2011:1-9.
18. Parvez L, Vaidya M, Sakhardande A, Subburaj S, Rajagopalan TG. Evaluation of antitussive agents in man. *Pulm Pharmacol* 1996;9:299-308.
19. Pavesi L, Subburaj S, Porter-Shaw K. Application and validation of a computerized cough acquisition system for objective monitoring of acute cough: a meta-analysis. *Chest* 2001;120:1121-8.
20. Freestone C, Eccles R. Assessment of the antitussive efficacy of codeine in cough associated with common cold. *J Pharm Pharmacol* 1997;49:1045-9.

- 1  
2  
3 21. Paul IM, Yoder KE, Crowell KR, et al. Effect of dextromethorphan, diphenhydramine, and  
4 placebo on nocturnal cough and sleep quality for coughing children and their parents.  
5 Pediatrics 2004;114:e85-e90.  
6  
7
- 8 22. Korppi M, Laurikainen K, Pietikainen M, Silvasti M. Antitussives in the treatment of acute  
9 transient cough in children. Acta Paediatr Scand 1991;80:969-71.  
10
- 11 23. Braman SS. Chronic cough due to acute bronchitis: ACCP evidence-based clinical practice  
12 guidelines. Chest 2006;129:95S-103S.  
13
- 14 24. Melbye H, Kongerud J, Vorland L. Reversible airflow limitation in adults with respiratory  
15 infection. Eur Respir J 1994;7:1239-45.  
16
- 17 25. Becker LA, Hom J, Villasis-Keever M, van der Wouden JC. Beta2-agonists for acute cough or  
18 a clinical diagnosis of acute bronchitis. Cochrane Database Syst Rev 2015;9:CD001726.  
19
- 20 26. Melbye H, Aasebø U, Straume B. Symptomatic effect of inhaled fenoterol in acute  
21 bronchitis: a placebo-controlled double-blind study. Fam Pract 1991;8:216-22.  
22
- 23 27. Higebottam TW. Anticholinergics and cough. Postgrad Med J 1987;63(Suppl 1):75-8.  
24
- 25 28. Zanasi A, Lecchi M, del Forno M, et al. A randomized placebo-controlled, double-blind trial  
26 on the management of post-infective cough by inhaled ipratropium and salbutamol  
27 administered in combination. Pulm Pharmacol Ther 2014;29:224-32.  
28
- 29 29. Coulson FR, Fryer AD. Muscarinic acetylcholine receptors and airway diseases. Pharmacol  
30 Ther 2003;98:59-69.  
31
- 32 30. Wang K, Birring SS, Taylor K, et al. Montelukast for post-infectious cough in adults: a  
33 double-blind randomised placebo-controlled trial. Lancet Respir Med 2014;2:35-43.  
34
- 35 31. Cayley WE. Beta2 agonists for acute cough or a clinical diagnosis of acute bronchitis. Am  
36 Fam Physician 2017;95:551.  
37
- 38 32. Oduwole O, Udoh EE, Oyo-Ita A, Meremikwu MM. Honey for acute cough in children.  
39 Cochrane Database Syst Rev 2018;4:CD007094.  
40
- 41 33. Khan RU, Naz S, Abudabos AM. Towards a better understanding of the therapeutic  
42 applications and corresponding mechanisms of action of honey. Environ Sci Pollut Res Int  
43 2017;24:27755–27766.  
44
- 45 34. Lusby PE, Coombes AL, Wilkinson JM. Bactericidal activity of different honeys against  
46 pathogenic bacteria. Arch Med Res 2005;36:464–7.  
47
- 48 35. de la Poza Abad M, Mas Dalmau G, Moreno Bakedano M, et al; Delayed Antibiotic  
49 Prescription (DAP) Group. Prescription strategies in acute uncomplicated respiratory  
50 infections: A randomized clinical trial. JAMA Intern Med 2016;176:21-9.  
51  
52  
53  
54  
55  
56  
57  
58  
59  
60

**Table 1. Timetable of study period.**

| Day                                                                                                                 | Day 1   | Day 2-4       | Day 15  | Day 29 <sup>a</sup> |               | Day 43 <sup>b</sup> |
|---------------------------------------------------------------------------------------------------------------------|---------|---------------|---------|---------------------|---------------|---------------------|
| Visit                                                                                                               | Visit 1 | Phone visit 1 | Visit 2 | Visit 3             | Phone visit 2 | Phone visit 3       |
| Visit at the centre                                                                                                 | X       |               | X       | X <sup>c</sup>      |               |                     |
| Medical history and physical examination                                                                            | X       |               |         |                     |               |                     |
| Explanation of the study and informed consent                                                                       | X       |               |         |                     |               |                     |
| Initial CRF                                                                                                         | X       |               |         |                     |               |                     |
| Randomisation                                                                                                       | X       |               |         |                     |               |                     |
| Dispensing the study treatment                                                                                      | X       |               |         |                     |               |                     |
| Peak flow determination                                                                                             | X       |               |         |                     |               |                     |
| Giving out of the first symptom diary, up to day 15                                                                 | X       |               |         |                     |               |                     |
| Assessment of the clinical outcome                                                                                  |         | X             | X       | X                   | X             | X                   |
| Adherence to the study drug                                                                                         |         | X             | X       |                     |               |                     |
| Evaluation of adverse events                                                                                        |         | X             | X       | X                   | X             | X                   |
| Collection of the first symptom diary and giving out of the second symptom diary from day 16 to day 29 <sup>d</sup> |         |               | X       |                     |               |                     |
| Collection of the second symptom diary                                                                              |         |               |         | X                   |               |                     |
| Evaluation of re-attendance to healthcare services due to infectious condition                                      |         | X             | X       | X                   | X             | X                   |

|                             |  |   |   |   |   |   |
|-----------------------------|--|---|---|---|---|---|
| Evaluation of complications |  | X | X | X | X | X |
|-----------------------------|--|---|---|---|---|---|

<sup>a</sup>Final visit if the symptoms have disappeared.

<sup>b</sup>Only if the visit at day 29 is at the centre and a cure or improvement is recorded.

<sup>c</sup>Phone visit if a cure is recorded at day 15.

<sup>d</sup>Only if the patient still has symptoms of infection (improvement).

For peer review only

1  
2  
3  
4  
5  
6  
7  
8  
9  
10  
11  
12  
13  
14  
15  
16  
17  
18  
19  
20  
21  
22  
23  
24  
25  
26  
27  
28  
29  
30  
31  
32  
33  
34  
35  
36  
37  
38  
39  
40  
41  
42  
43  
44  
45  
46  
47  
48  
49  
50  
51  
52  
53  
54  
55  
56  
57  
58  
59  
60

**Figure 1.** Study scheme.

For peer review only

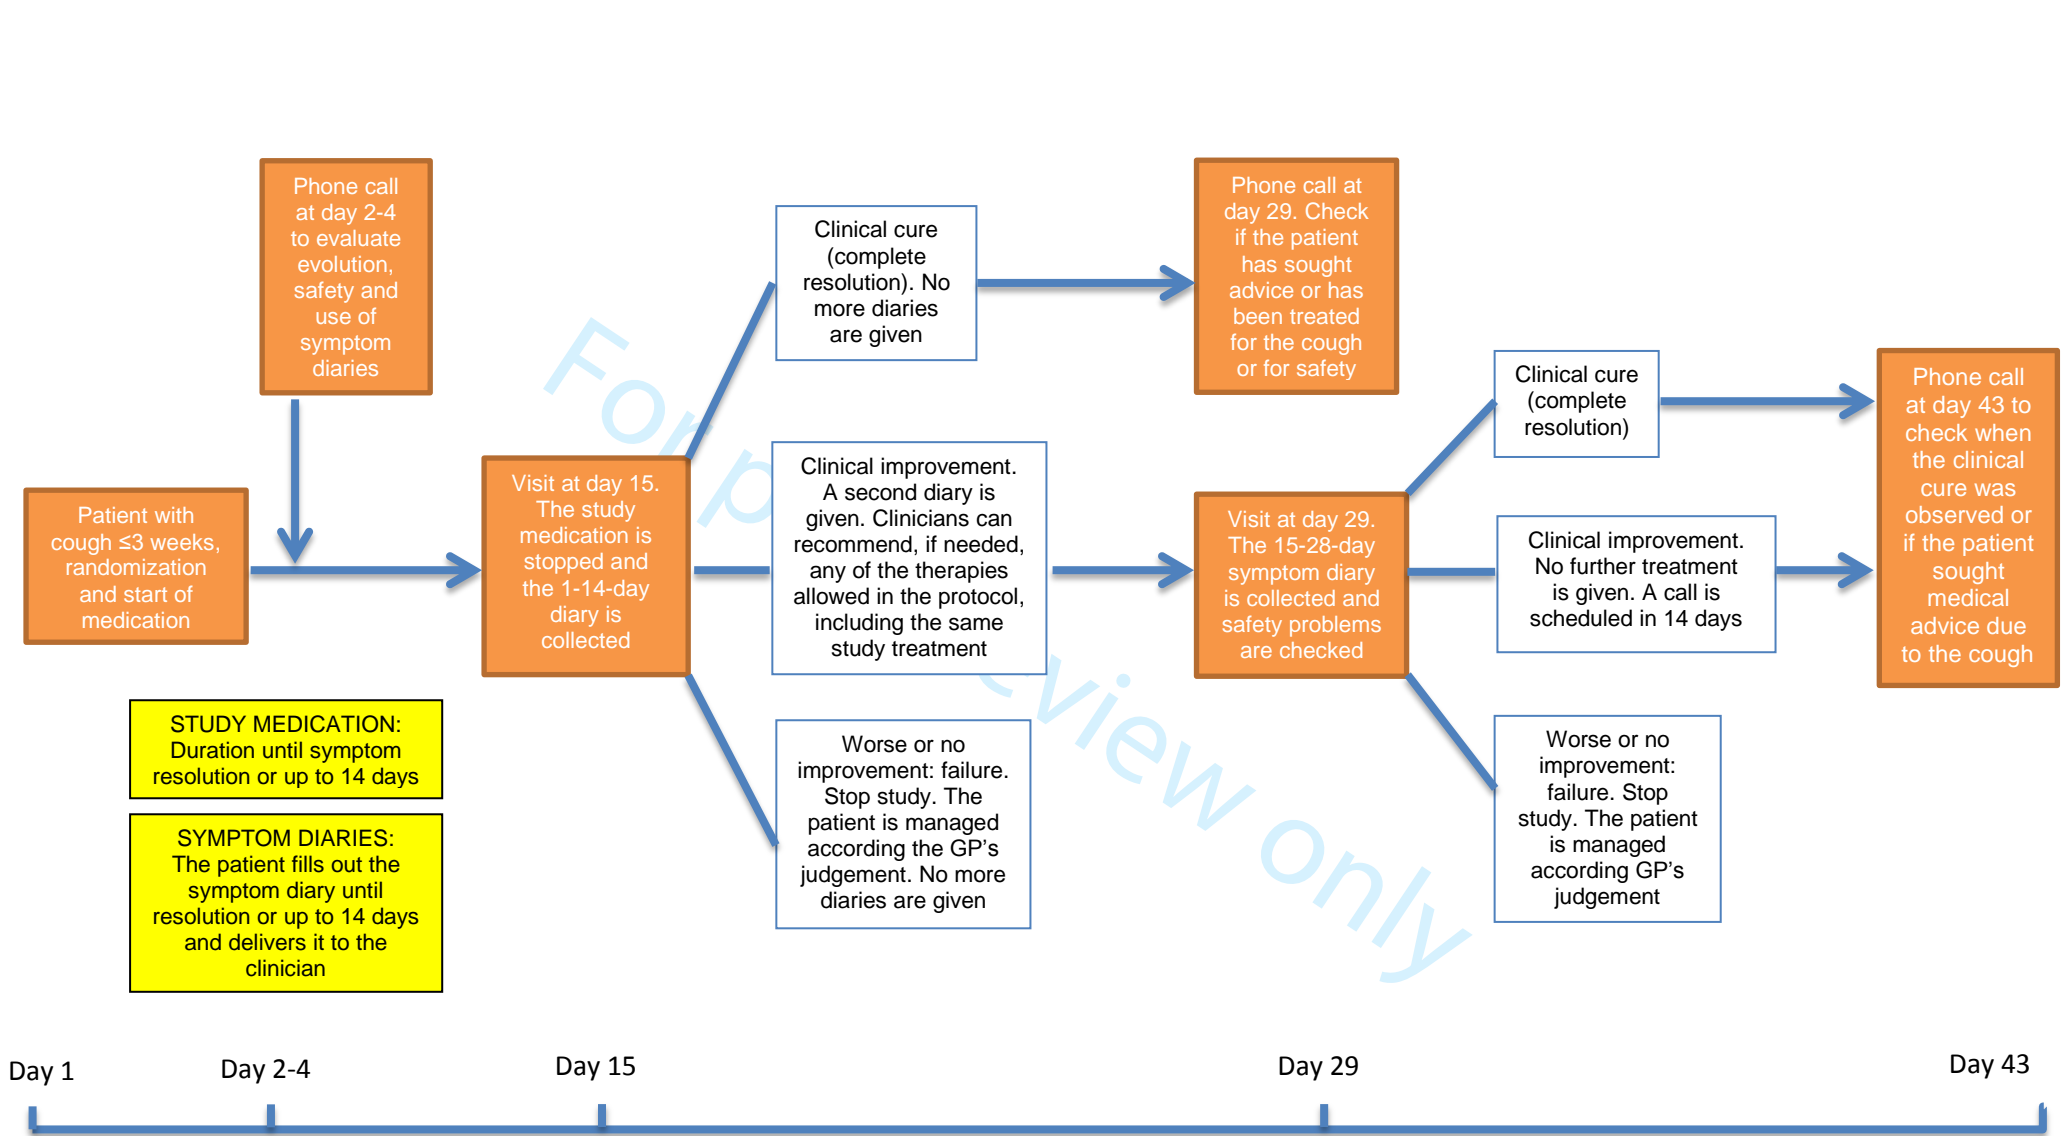



STANDARD PROTOCOL ITEMS: RECOMMENDATIONS FOR INTERVENTIONAL TRIALS

SPIRIT 2013 Checklist: Recommended items to address in a clinical trial protocol and related documents\*

| Section/item                      | Item No | Description                                                                                                                                                                                                                                                                              | Addressed on page number |
|-----------------------------------|---------|------------------------------------------------------------------------------------------------------------------------------------------------------------------------------------------------------------------------------------------------------------------------------------------|--------------------------|
| <b>Administrative information</b> |         |                                                                                                                                                                                                                                                                                          |                          |
| Title                             | 1       | Descriptive title identifying the study design, population, interventions, and, if applicable, trial acronym                                                                                                                                                                             | ___ 1 ___                |
| Trial registration                | 2a      | Trial identifier and registry name. If not yet registered, name of intended registry                                                                                                                                                                                                     | ___ 3 ___                |
|                                   | 2b      | All items from the World Health Organization Trial Registration Data Set                                                                                                                                                                                                                 | ___ NA ___               |
| Protocol version                  | 3       | Date and version identifier                                                                                                                                                                                                                                                              | ___ 1 ___                |
| Funding                           | 4       | Sources and types of financial, material, and other support                                                                                                                                                                                                                              | ___ 16 ___               |
| Roles and responsibilities        | 5a      | Names, affiliations, and roles of protocol contributors                                                                                                                                                                                                                                  | ___ 16 ___               |
|                                   | 5b      | Name and contact information for the trial sponsor                                                                                                                                                                                                                                       | ___ 16 ___               |
|                                   | 5c      | Role of study sponsor and funders, if any, in study design; collection, management, analysis, and interpretation of data; writing of the report; and the decision to submit the report for publication, including whether they will have ultimate authority over any of these activities | ___ 16 ___               |
|                                   | 5d      | Composition, roles, and responsibilities of the coordinating centre, steering committee, endpoint adjudication committee, data management team, and other individuals or groups overseeing the trial, if applicable (see Item 21a for data monitoring committee)                         | ___ 16 ___               |

1 **Introduction**

2

3 Background and rationale 6a Description of research question and justification for undertaking the trial, including summary of relevant studies (published and unpublished) examining benefits and harms for each intervention \_\_\_\_\_4-7\_\_\_\_\_

4

5

6 6b Explanation for choice of comparators \_\_\_\_\_4-7\_\_\_\_\_

7

8 Objectives 7 Specific objectives or hypotheses \_\_\_\_\_7\_\_\_\_\_

9

10 Trial design 8 Description of trial design including type of trial (eg, parallel group, crossover, factorial, single group), allocation ratio, and framework (eg, superiority, equivalence, noninferiority, exploratory) \_\_\_\_\_7,8\_\_\_\_\_

11

12

13

14 **Methods: Participants, interventions, and outcomes**

15

16 Study setting 9 Description of study settings (eg, community clinic, academic hospital) and list of countries where data will be collected. Reference to where list of study sites can be obtained \_\_\_\_\_7\_\_\_\_\_

17

18

19 Eligibility criteria 10 Inclusion and exclusion criteria for participants. If applicable, eligibility criteria for study centres and individuals who will perform the interventions (eg, surgeons, psychotherapists) \_\_\_\_\_7,8\_\_\_\_\_

20

21

22 Interventions 11a Interventions for each group with sufficient detail to allow replication, including how and when they will be administered \_\_\_\_\_8\_\_\_\_\_

23

24

25 11b Criteria for discontinuing or modifying allocated interventions for a given trial participant (eg, drug dose change in response to harms, participant request, or improving/worsening disease) \_\_\_\_\_11\_\_\_\_\_

26

27

28 11c Strategies to improve adherence to intervention protocols, and any procedures for monitoring adherence (eg, drug tablet return, laboratory tests) \_\_\_\_\_12\_\_\_\_\_

29

30

31 11d Relevant concomitant care and interventions that are permitted or prohibited during the trial \_\_\_\_\_13, Fig.1\_\_\_\_\_

32

33

34 Outcomes 12 Primary, secondary, and other outcomes, including the specific measurement variable (eg, systolic blood pressure), analysis metric (eg, change from baseline, final value, time to event), method of aggregation (eg, median, proportion), and time point for each outcome. Explanation of the clinical relevance of chosen efficacy and harm outcomes is strongly recommended \_\_\_\_\_10,11\_\_\_\_\_

35

36

37

38

39

40 Participant timeline 13 Time schedule of enrolment, interventions (including any run-ins and washouts), assessments, and visits for participants. A schematic diagram is highly recommended (see Figure) \_\_\_\_\_12,13\_\_\_\_\_

41

42

43

44

45

46



|    |                                                                     |     |                                                                                                                                                                                                                                                                                                                                                                                                              |                        |
|----|---------------------------------------------------------------------|-----|--------------------------------------------------------------------------------------------------------------------------------------------------------------------------------------------------------------------------------------------------------------------------------------------------------------------------------------------------------------------------------------------------------------|------------------------|
| 1  | Sample size                                                         | 14  | Estimated number of participants needed to achieve study objectives and how it was determined, including clinical and statistical assumptions supporting any sample size calculations                                                                                                                                                                                                                        | _____8_____            |
| 2  |                                                                     |     |                                                                                                                                                                                                                                                                                                                                                                                                              |                        |
| 3  |                                                                     |     |                                                                                                                                                                                                                                                                                                                                                                                                              |                        |
| 4  | Recruitment                                                         | 15  | Strategies for achieving adequate participant enrolment to reach target sample size                                                                                                                                                                                                                                                                                                                          | _____8_____            |
| 5  |                                                                     |     |                                                                                                                                                                                                                                                                                                                                                                                                              |                        |
| 6  |                                                                     |     |                                                                                                                                                                                                                                                                                                                                                                                                              |                        |
| 7  | <b>Methods: Assignment of interventions (for controlled trials)</b> |     |                                                                                                                                                                                                                                                                                                                                                                                                              |                        |
| 8  | Allocation:                                                         |     |                                                                                                                                                                                                                                                                                                                                                                                                              |                        |
| 9  |                                                                     |     |                                                                                                                                                                                                                                                                                                                                                                                                              |                        |
| 10 | Sequence generation                                                 | 16a | Method of generating the allocation sequence (eg, computer-generated random numbers), and list of any factors for stratification. To reduce predictability of a random sequence, details of any planned restriction (eg, blocking) should be provided in a separate document that is unavailable to those who enrol participants or assign interventions                                                     | _____10_____           |
| 11 |                                                                     |     |                                                                                                                                                                                                                                                                                                                                                                                                              |                        |
| 12 |                                                                     |     |                                                                                                                                                                                                                                                                                                                                                                                                              |                        |
| 13 |                                                                     |     |                                                                                                                                                                                                                                                                                                                                                                                                              |                        |
| 14 |                                                                     |     |                                                                                                                                                                                                                                                                                                                                                                                                              |                        |
| 15 |                                                                     |     |                                                                                                                                                                                                                                                                                                                                                                                                              |                        |
| 16 | Allocation concealment mechanism                                    | 16b | Mechanism of implementing the allocation sequence (eg, central telephone; sequentially numbered, opaque, sealed envelopes), describing any steps to conceal the sequence until interventions are assigned                                                                                                                                                                                                    | _____10_____           |
| 17 |                                                                     |     |                                                                                                                                                                                                                                                                                                                                                                                                              |                        |
| 18 |                                                                     |     |                                                                                                                                                                                                                                                                                                                                                                                                              |                        |
| 19 |                                                                     |     |                                                                                                                                                                                                                                                                                                                                                                                                              |                        |
| 20 | Implementation                                                      | 16c | Who will generate the allocation sequence, who will enrol participants, and who will assign participants to interventions                                                                                                                                                                                                                                                                                    | _____10_____           |
| 21 |                                                                     |     |                                                                                                                                                                                                                                                                                                                                                                                                              |                        |
| 22 |                                                                     |     |                                                                                                                                                                                                                                                                                                                                                                                                              |                        |
| 23 |                                                                     |     |                                                                                                                                                                                                                                                                                                                                                                                                              |                        |
| 24 | Blinding (masking)                                                  | 17a | Who will be blinded after assignment to interventions (eg, trial participants, care providers, outcome assessors, data analysts), and how                                                                                                                                                                                                                                                                    | _____10_____           |
| 25 |                                                                     |     |                                                                                                                                                                                                                                                                                                                                                                                                              |                        |
| 26 |                                                                     |     |                                                                                                                                                                                                                                                                                                                                                                                                              |                        |
| 27 |                                                                     | 17b | If blinded, circumstances under which unblinding is permissible, and procedure for revealing a participant's allocated intervention during the trial                                                                                                                                                                                                                                                         | _____Not blinded_____  |
| 28 |                                                                     |     |                                                                                                                                                                                                                                                                                                                                                                                                              |                        |
| 29 |                                                                     |     |                                                                                                                                                                                                                                                                                                                                                                                                              |                        |
| 30 |                                                                     |     |                                                                                                                                                                                                                                                                                                                                                                                                              |                        |
| 31 | <b>Methods: Data collection, management, and analysis</b>           |     |                                                                                                                                                                                                                                                                                                                                                                                                              |                        |
| 32 |                                                                     |     |                                                                                                                                                                                                                                                                                                                                                                                                              |                        |
| 33 | Data collection methods                                             | 18a | Plans for assessment and collection of outcome, baseline, and other trial data, including any related processes to promote data quality (eg, duplicate measurements, training of assessors) and a description of study instruments (eg, questionnaires, laboratory tests) along with their reliability and validity, if known. Reference to where data collection forms can be found, if not in the protocol | _____11,12_____        |
| 34 |                                                                     |     |                                                                                                                                                                                                                                                                                                                                                                                                              |                        |
| 35 |                                                                     |     |                                                                                                                                                                                                                                                                                                                                                                                                              |                        |
| 36 |                                                                     |     |                                                                                                                                                                                                                                                                                                                                                                                                              |                        |
| 37 |                                                                     |     |                                                                                                                                                                                                                                                                                                                                                                                                              |                        |
| 38 |                                                                     |     |                                                                                                                                                                                                                                                                                                                                                                                                              |                        |
| 39 |                                                                     | 18b | Plans to promote participant retention and complete follow-up, including list of any outcome data to be collected for participants who discontinue or deviate from intervention protocols                                                                                                                                                                                                                    | _____12,13,table1_____ |
| 40 |                                                                     |     |                                                                                                                                                                                                                                                                                                                                                                                                              |                        |
| 41 |                                                                     |     |                                                                                                                                                                                                                                                                                                                                                                                                              |                        |
| 42 |                                                                     |     |                                                                                                                                                                                                                                                                                                                                                                                                              |                        |

|    |                                 |     |                                                                                                                                                                                                                                                                                                                                       |               |
|----|---------------------------------|-----|---------------------------------------------------------------------------------------------------------------------------------------------------------------------------------------------------------------------------------------------------------------------------------------------------------------------------------------|---------------|
| 1  | Data management                 | 19  | Plans for data entry, coding, security, and storage, including any related processes to promote data quality (eg, double data entry; range checks for data values). Reference to where details of data management procedures can be found, if not in the protocol                                                                     | ___ 13,14 ___ |
| 2  |                                 |     |                                                                                                                                                                                                                                                                                                                                       |               |
| 3  |                                 |     |                                                                                                                                                                                                                                                                                                                                       |               |
| 4  |                                 |     |                                                                                                                                                                                                                                                                                                                                       |               |
| 5  | Statistical methods             | 20a | Statistical methods for analysing primary and secondary outcomes. Reference to where other details of the statistical analysis plan can be found, if not in the protocol                                                                                                                                                              | ___ 13 ___    |
| 6  |                                 |     |                                                                                                                                                                                                                                                                                                                                       |               |
| 7  |                                 |     |                                                                                                                                                                                                                                                                                                                                       |               |
| 8  |                                 | 20b | Methods for any additional analyses (eg, subgroup and adjusted analyses)                                                                                                                                                                                                                                                              | ___ 13 ___    |
| 9  |                                 |     |                                                                                                                                                                                                                                                                                                                                       |               |
| 10 |                                 | 20c | Definition of analysis population relating to protocol non-adherence (eg, as randomised analysis), and any statistical methods to handle missing data (eg, multiple imputation)                                                                                                                                                       | ___ 13 ___    |
| 11 |                                 |     |                                                                                                                                                                                                                                                                                                                                       |               |
| 12 |                                 |     |                                                                                                                                                                                                                                                                                                                                       |               |
| 13 |                                 |     |                                                                                                                                                                                                                                                                                                                                       |               |
| 14 | <b>Methods: Monitoring</b>      |     |                                                                                                                                                                                                                                                                                                                                       |               |
| 15 |                                 |     |                                                                                                                                                                                                                                                                                                                                       |               |
| 16 | Data monitoring                 | 21a | Composition of data monitoring committee (DMC); summary of its role and reporting structure; statement of whether it is independent from the sponsor and competing interests; and reference to where further details about its charter can be found, if not in the protocol. Alternatively, an explanation of why a DMC is not needed | ___ 14 ___    |
| 17 |                                 |     |                                                                                                                                                                                                                                                                                                                                       |               |
| 18 |                                 |     |                                                                                                                                                                                                                                                                                                                                       |               |
| 19 |                                 |     |                                                                                                                                                                                                                                                                                                                                       |               |
| 20 |                                 |     |                                                                                                                                                                                                                                                                                                                                       |               |
| 21 |                                 |     |                                                                                                                                                                                                                                                                                                                                       |               |
| 22 |                                 | 21b | Description of any interim analyses and stopping guidelines, including who will have access to these interim results and make the final decision to terminate the trial                                                                                                                                                               | ___ NA ___    |
| 23 |                                 |     |                                                                                                                                                                                                                                                                                                                                       |               |
| 24 |                                 |     |                                                                                                                                                                                                                                                                                                                                       |               |
| 25 | Harms                           | 22  | Plans for collecting, assessing, reporting, and managing solicited and spontaneously reported adverse events and other unintended effects of trial interventions or trial conduct                                                                                                                                                     | ___ 14 ___    |
| 26 |                                 |     |                                                                                                                                                                                                                                                                                                                                       |               |
| 27 |                                 |     |                                                                                                                                                                                                                                                                                                                                       |               |
| 28 | Auditing                        | 23  | Frequency and procedures for auditing trial conduct, if any, and whether the process will be independent from investigators and the sponsor                                                                                                                                                                                           | ___ 14 ___    |
| 29 |                                 |     |                                                                                                                                                                                                                                                                                                                                       |               |
| 30 |                                 |     |                                                                                                                                                                                                                                                                                                                                       |               |
| 31 |                                 |     |                                                                                                                                                                                                                                                                                                                                       |               |
| 32 | <b>Ethics and dissemination</b> |     |                                                                                                                                                                                                                                                                                                                                       |               |
| 33 |                                 |     |                                                                                                                                                                                                                                                                                                                                       |               |
| 34 | Research ethics approval        | 24  | Plans for seeking research ethics committee/institutional review board (REC/IRB) approval                                                                                                                                                                                                                                             | ___ Done ___  |
| 35 |                                 |     |                                                                                                                                                                                                                                                                                                                                       |               |
| 36 |                                 |     |                                                                                                                                                                                                                                                                                                                                       |               |
| 37 | Protocol amendments             | 25  | Plans for communicating important protocol modifications (eg, changes to eligibility criteria, outcomes, analyses) to relevant parties (eg, investigators, REC/IRBs, trial participants, trial registries, journals, regulators)                                                                                                      | ___ 15 ___    |
| 38 |                                 |     |                                                                                                                                                                                                                                                                                                                                       |               |
| 39 |                                 |     |                                                                                                                                                                                                                                                                                                                                       |               |
| 40 |                                 |     |                                                                                                                                                                                                                                                                                                                                       |               |
| 41 |                                 |     |                                                                                                                                                                                                                                                                                                                                       |               |
| 42 |                                 |     |                                                                                                                                                                                                                                                                                                                                       |               |
| 43 |                                 |     |                                                                                                                                                                                                                                                                                                                                       |               |
| 44 |                                 |     |                                                                                                                                                                                                                                                                                                                                       |               |
| 45 |                                 |     |                                                                                                                                                                                                                                                                                                                                       |               |
| 46 |                                 |     |                                                                                                                                                                                                                                                                                                                                       |               |

|    |                               |     |                                                                                                                                                                                                                                                                                     |                        |
|----|-------------------------------|-----|-------------------------------------------------------------------------------------------------------------------------------------------------------------------------------------------------------------------------------------------------------------------------------------|------------------------|
| 1  | Consent or assent             | 26a | Who will obtain informed consent or assent from potential trial participants or authorised surrogates, and how (see Item 32)                                                                                                                                                        | ___ 14 ___             |
| 2  |                               |     |                                                                                                                                                                                                                                                                                     |                        |
| 3  |                               |     |                                                                                                                                                                                                                                                                                     |                        |
| 4  |                               | 26b | Additional consent provisions for collection and use of participant data and biological specimens in ancillary studies, if applicable                                                                                                                                               | ___ Not applicable ___ |
| 5  |                               |     |                                                                                                                                                                                                                                                                                     |                        |
| 6  |                               |     |                                                                                                                                                                                                                                                                                     |                        |
| 7  | Confidentiality               | 27  | How personal information about potential and enrolled participants will be collected, shared, and maintained in order to protect confidentiality before, during, and after the trial                                                                                                | ___ 14 ___             |
| 8  |                               |     |                                                                                                                                                                                                                                                                                     |                        |
| 9  |                               |     |                                                                                                                                                                                                                                                                                     |                        |
| 10 | Declaration of interests      | 28  | Financial and other competing interests for principal investigators for the overall trial and each study site                                                                                                                                                                       | ___ 16 ___             |
| 11 |                               |     |                                                                                                                                                                                                                                                                                     |                        |
| 12 |                               |     |                                                                                                                                                                                                                                                                                     |                        |
| 13 | Access to data                | 29  | Statement of who will have access to the final trial dataset, and disclosure of contractual agreements that limit such access for investigators                                                                                                                                     | ___ 14 ___             |
| 14 |                               |     |                                                                                                                                                                                                                                                                                     |                        |
| 15 |                               |     |                                                                                                                                                                                                                                                                                     |                        |
| 16 |                               |     |                                                                                                                                                                                                                                                                                     |                        |
| 17 | Ancillary and post-trial care | 30  | Provisions, if any, for ancillary and post-trial care, and for compensation to those who suffer harm from trial participation                                                                                                                                                       | ___ 13 ___             |
| 18 |                               |     |                                                                                                                                                                                                                                                                                     |                        |
| 19 |                               |     |                                                                                                                                                                                                                                                                                     |                        |
| 20 | Dissemination policy          | 31a | Plans for investigators and sponsor to communicate trial results to participants, healthcare professionals, the public, and other relevant groups (eg, via publication, reporting in results databases, or other data sharing arrangements), including any publication restrictions | ___ 15 ___             |
| 21 |                               |     |                                                                                                                                                                                                                                                                                     |                        |
| 22 |                               |     |                                                                                                                                                                                                                                                                                     |                        |
| 23 |                               |     |                                                                                                                                                                                                                                                                                     |                        |
| 24 |                               | 31b | Authorship eligibility guidelines and any intended use of professional writers                                                                                                                                                                                                      | ___ Not applicable ___ |
| 25 |                               |     |                                                                                                                                                                                                                                                                                     |                        |
| 26 |                               | 31c | Plans, if any, for granting public access to the full protocol, participant-level dataset, and statistical code                                                                                                                                                                     | ___ No ___             |
| 27 |                               |     |                                                                                                                                                                                                                                                                                     |                        |
| 28 |                               |     |                                                                                                                                                                                                                                                                                     |                        |
| 29 | <b>Appendices</b>             |     |                                                                                                                                                                                                                                                                                     |                        |
| 30 |                               |     |                                                                                                                                                                                                                                                                                     |                        |
| 31 | Informed consent materials    | 32  | Model consent form and other related documentation given to participants and authorised surrogates                                                                                                                                                                                  | ___ Appendix ___       |
| 32 |                               |     |                                                                                                                                                                                                                                                                                     |                        |
| 33 |                               |     |                                                                                                                                                                                                                                                                                     |                        |
| 34 | Biological specimens          | 33  | Plans for collection, laboratory evaluation, and storage of biological specimens for genetic or molecular analysis in the current trial and for future use in ancillary studies, if applicable                                                                                      | ___ Not applicable ___ |
| 35 |                               |     |                                                                                                                                                                                                                                                                                     |                        |
| 36 |                               |     |                                                                                                                                                                                                                                                                                     |                        |

37 \*It is strongly recommended that this checklist be read in conjunction with the SPIRIT 2013 Explanation & Elaboration for important clarification on the items.  
 38 Amendments to the protocol should be tracked and dated. The SPIRIT checklist is copyrighted by the SPIRIT Group under the Creative Commons  
 39 "[Attribution-NonCommercial-NoDerivs 3.0 Unported](https://creativecommons.org/licenses/by-nc-nd/3.0/)" license.  
 40  
 41  
 42

# BMJ Open

## Effectiveness of antitussives, anticholinergics or honey versus usual care in adults with uncomplicated acute bronchitis: A study protocol of an open randomized clinical trial in primary care.

|                                 |                                                                                                                                                                                                                                                                                                                                                                                                                                                                                                                                                                                                                                                                                                                                                                                                                                                                                                                                                                                                                                                                                                                                                                                                                                                                                                                                           |
|---------------------------------|-------------------------------------------------------------------------------------------------------------------------------------------------------------------------------------------------------------------------------------------------------------------------------------------------------------------------------------------------------------------------------------------------------------------------------------------------------------------------------------------------------------------------------------------------------------------------------------------------------------------------------------------------------------------------------------------------------------------------------------------------------------------------------------------------------------------------------------------------------------------------------------------------------------------------------------------------------------------------------------------------------------------------------------------------------------------------------------------------------------------------------------------------------------------------------------------------------------------------------------------------------------------------------------------------------------------------------------------|
| Journal:                        | <i>BMJ Open</i>                                                                                                                                                                                                                                                                                                                                                                                                                                                                                                                                                                                                                                                                                                                                                                                                                                                                                                                                                                                                                                                                                                                                                                                                                                                                                                                           |
| Manuscript ID                   | bmjopen-2018-028159.R2                                                                                                                                                                                                                                                                                                                                                                                                                                                                                                                                                                                                                                                                                                                                                                                                                                                                                                                                                                                                                                                                                                                                                                                                                                                                                                                    |
| Article Type:                   | Protocol                                                                                                                                                                                                                                                                                                                                                                                                                                                                                                                                                                                                                                                                                                                                                                                                                                                                                                                                                                                                                                                                                                                                                                                                                                                                                                                                  |
| Date Submitted by the Author:   | 14-Mar-2019                                                                                                                                                                                                                                                                                                                                                                                                                                                                                                                                                                                                                                                                                                                                                                                                                                                                                                                                                                                                                                                                                                                                                                                                                                                                                                                               |
| Complete List of Authors:       | Cots, Josep M.; Universitat de Barcelona, Primary Healthcare Centre La Marina, Barcelona, Spain<br>Moragas, Ana; Universitat Rovira i Virgili, Primary Healthcare Centre Jaume I, Tarragona, Spain<br>García-Sangenís, Ana; Institut Universitari d'Investigació en Atenció Primària Jordi Gol (IDIAP Jordi Gol), Medicines Research Unit; Plataforma SCReN, UICEC IDIAP Jordi Gol<br>Morros, Rosa; Institut Universitari d'Investigació en Atenció Primària Jordi Gol (IDIAP Jordi Gol), Medicines Research Unit; Universitat Autònoma de Barcelona, Departament de Farmacologia i Terapèutica<br>Gomez, Ainhoa; Institut Universitari d'Investigació en Atenció Primària Jordi Gol (IDIAP Jordi Gol), Medicines Research Unit Barcelona, ES<br>Ouchi, Dan; Institut Universitari d'Investigació en Atenció Primària (IDIAP) Jordi Gol<br>Monfà, Ramon ; Institut Universitari d'Investigació en Atenció Primària (IDIAP) Jordi Gol<br>Pera, Helena; Institut Universitari d'Investigació en Atenció Primària Jordi Gol (IDIAP Jordi Gol), Medicines Research Unit; Plataforma SCReN, UICEC IDIAP Jordi Gol<br>Pujol, Jesus; Balaguer Health Centre, Balaguer<br>Bayona, Carolina; Primary Healthcare Centre La Marina de la Poza, Mariam; Institut Català de la Salut<br>Llor, Carl; Primary healthcare centre Barcelona-2B (Via Roma), |
| <b>Primary Subject Heading</b>: | Infectious diseases                                                                                                                                                                                                                                                                                                                                                                                                                                                                                                                                                                                                                                                                                                                                                                                                                                                                                                                                                                                                                                                                                                                                                                                                                                                                                                                       |
| Secondary Subject Heading:      | General practice / Family practice, Infectious diseases, Respiratory medicine                                                                                                                                                                                                                                                                                                                                                                                                                                                                                                                                                                                                                                                                                                                                                                                                                                                                                                                                                                                                                                                                                                                                                                                                                                                             |
| Keywords:                       | INFECTIOUS DISEASES, THERAPEUTICS, Respiratory infections < THORACIC MEDICINE                                                                                                                                                                                                                                                                                                                                                                                                                                                                                                                                                                                                                                                                                                                                                                                                                                                                                                                                                                                                                                                                                                                                                                                                                                                             |
|                                 |                                                                                                                                                                                                                                                                                                                                                                                                                                                                                                                                                                                                                                                                                                                                                                                                                                                                                                                                                                                                                                                                                                                                                                                                                                                                                                                                           |

1  
2  
3  
4  
5  
6  
7  
8  
9  
10  
11  
12  
13  
14  
15  
16  
17  
18  
19  
20  
21  
22  
23  
24  
25  
26  
27  
28  
29  
30  
31  
32  
33  
34  
35  
36  
37  
38  
39  
40  
41  
42  
43  
44  
45  
46  
47  
48  
49  
50  
51  
52  
53  
54  
55  
56  
57  
58  
59  
60



**Title**

Effectiveness of antitussives, anticholinergics or honey versus usual care in adults with uncomplicated acute bronchitis: a study protocol of an open randomized clinical trial in primary care.

**Authors**

Josep M. Cots, GP<sup>1</sup>; Ana Moragas, GP<sup>2</sup>; Ana García-Sangenís, monitor<sup>3,4,5</sup>; Rosa Morros, pharmacologist<sup>3,4,5</sup>; Ainhoa Gómez-Lumbreras, pharmacologist<sup>3,4,5</sup>; Dan Ouchi, statistician<sup>3</sup>; Ramon Monfà, monitor<sup>3,4,5</sup>, Helena Pera<sup>3,4,5</sup>, Jesus Pujol, GP<sup>6</sup>; Carolina Bayona, GP<sup>2</sup>; Mariam de la Poza-Abad, GP<sup>7</sup>; Carl Llor, GP<sup>3,8</sup>

<sup>1</sup>La Marina Health Centre, Barcelona, Spain

<sup>2</sup>Jaume I Health Centre, Tarragona, Spain

<sup>3</sup>Institut Universitari d'Investigació en Atenció Primària (IDIAP) Jordi Gol, Barcelona, Spain

<sup>4</sup>Universitat Autònoma de Barcelona, Bellaterra, Spain

<sup>5</sup>Unidad de Investigación Clínica y Ensayos Clínicos = Plataforma ScREN, Spain

<sup>6</sup>Balaguer Health Centre, Balaguer, Spain

<sup>7</sup>Carrer del Foc Health Centre, Barcelona, Spain

<sup>8</sup>Via Roma Health Centre, Barcelona, Spain

**Corresponding author**

Carl Llor

Via Roma Primary Health Centre

c. Manso 19, 3rd floor

08015 Barcelona, Spain

Email: [carles.llor@gmail.com](mailto:carles.llor@gmail.com)

**ABSTRACT**

**Introduction:** Despite the frequent use of therapies in acute bronchitis, the evidence of their benefit is lacking, since only a few clinical trials have been published, with low sample sizes, poor methodological quality and mainly in children. The objective of this study is to compare the effectiveness of 3 symptomatic therapies (dextromethorphan, ipratropium or honey) associated with usual care and the usual care in adults with acute bronchitis.

**Methods and analysis:** This will be a multicentre, pragmatic, parallel group, open randomised trial. Patients aged 18 or over with uncomplicated acute bronchitis, with cough for less than three weeks as the main symptom, scoring  $\geq 4$  in either daytime or nocturnal cough on a 7-point Likert scale, will be randomised to one of the following four groups: usual care, dextromethorphan 30 mg t.i.d., ipratropium bromide inhaler 20  $\mu\text{g}$  2 puffs t.i.d, or 30 mg (a spoonful) of honey t.i.d., all taken for up to 14 days. The exclusion criteria will be pneumonia, criteria for hospital admission, pregnancy or lactation, concomitant pulmonary disease, associated significant comorbidity, allergy, intolerance or contraindication to any of the study drugs or admitted to a long-term residence. Sample: 668 patients. The primary outcome will be the number of days with moderate-severe cough. All patients will be given a paper-based symptom diary to be self-administered. A second visit will be scheduled at day 2-3 for assessing evolution, with two more visits at days 15 and 29 for clinical assessment, evaluation of adverse effects, re-attendance and complications. Patients still with symptoms at day 29 will be called six weeks after the baseline visit.

**Ethics and dissemination:** The study has been approved by the Ethical Board of IDIAP Jordi Gol (reference number: AC18/002). The findings of this trial will be disseminated through research conferences and peer-review journals.

**Trial registration number:** NCT03738917.

### STRENGTHS AND LIMITATIONS OF THIS STUDY

- Since this is a pragmatic clinical trial evaluating the effectiveness of different symptomatic therapies, masking techniques will not be used.
- A microbiological study will not be carried out as most cases of acute bronchitis have a viral aetiology, and sputum samples are not routinely collected in the primary care setting.
- The main objective as well as some of the secondary objectives of the study are based on information provided by the patients themselves in the symptom diaries. However, clinicians will encourage patients to fill them out appropriately and return them at the different follow-up visits scheduled.
- Since one quarter of patients with uncomplicated acute bronchitis still have cough after the first month, these patients will be followed and called two weeks later.



## BACKGROUND

Lower respiratory tract infections are common conditions in primary care. These infections affect approximately 5% of adults per year, and although they occur throughout the year, the incidence is higher in the autumn and winter [1]. The most frequent of these infections is acute bronchitis, which is a self-limiting infection of the lower airways that is characterized by clinical manifestations of cough with or without sputum and the absence of symptoms or signs of pneumonia. Other symptoms associated with acute bronchitis include fatigue, wheezing, headache, myalgias, hoarseness, and general discomfort [2]. As there are no specific diagnostic criteria for acute bronchitis, the diagnosis is primarily clinical and requires thorough assessment for differentiation from pneumonia, as well as other upper respiratory tract infections such as the common cold or sore throat [3]. However, cough is not the prominent symptom in the latter infections. Conversely, cough constitutes the most prominent manifestation of acute bronchitis and lasts an average of 3 weeks, but may persist for more than 1 month in 25% of the patients [4]. Initially, the cough is non-productive, but after about a week there is an increase in mucus production, and in the second week, the colour of the sputum often changes from grey-white to purulent. Despite being a self-limiting condition, most patients with acute bronchitis seek medical advice, mainly because of bothersome cough [5].

Treatment of acute bronchitis is usually symptomatic and is aimed at relieving annoying respiratory symptoms. Treatment should include good hand hygiene, increased fluid intake, avoidance of smoking and the elimination of environmental cough triggers (for instance, dust), and the use of vapours, particularly in low-humidity environments, mainly if symptoms include nasal stuffiness and nasal discharge. Many general practitioners (GP) prescribe antibiotics, despite evidence of little or no benefit, since up to 90% of acute bronchitis are of viral aetiology, thereby contributing to the emergence of bacterial resistance [6].

There are many approaches to the treatment of cough, including analgesics, non-steroidal anti-inflammatory drugs (NSAIDs), expectorants, mucolytics, antihistamines, decongestants, as well as antitussives,  $\beta$ 2-agonists or other bronchodilators, alternative therapies and natural treatment [3]. In general, these therapies are available as over-the-counter medicines in many countries, and their use is very widespread, particularly in southern European countries. In a recent observational study conducted in 12 European areas, Catalonia was one of the zones with the highest consumption of mucolytics, bronchodilators and antitussives [7].

1  
2  
3 According to the guidelines of the European Respiratory Society, acute cough can be treated  
4 with dextromethorphan or codeine, but mucolytics, antihistamines and bronchodilators should  
5 not be prescribed in acute lower respiratory tract infections [1]. The reviews carried out so far  
6 conclude that the benefit of these therapies is lacking. In general, the studies performed had  
7 small sample sizes and methodological flaws that make their comparison difficult [8]. It should  
8 be considered that over-the-counter preparations contain different drugs with a variety of  
9 modes of action that can make them difficult to compare [9]. Most clinicians recommend the  
10 use of analgesics to alleviate mainly fever, headache, myalgia, and chest pain. NSAIDs are also  
11 frequently prescribed in patients with lower respiratory infections, mainly for relieving cough.  
12 However, two recent randomised clinical trials have shown that the number of days with  
13 cough among patients taking NSAIDs is not significantly lower than placebo [10,11]. Some trials  
14 with inhaled corticosteroids have also shown a very marginal benefit, but the number of  
15 patients included in these studies was small [12]. The clinical efficacy of other symptomatic  
16 drugs is also questionable. For example, trials assessing the effect of expectorants and  
17 mucolytics have not shown favourable effects on cough associated with acute bronchitis [8].  
18 Despite being widely used, antihistamines have been evaluated primarily in the common cold  
19 and were not found to be beneficial to alleviate the symptoms of cough [13]. Studies assessing  
20 the benefits of *Echinacea*, Chinese herbs, *Pelargonium sidoides*, ivy leaf extracts and other  
21 herbal treatments have obtained contradictory results, mainly in patients with common cold,  
22 with low quality of evidence and some problems related to safety, and therefore, they are not  
23 recommended in patients with acute bronchitis [14-17].

24  
25  
26  
27  
28  
29  
30  
31  
32  
33  
34  
35  
36  
37  
38  
39 Most studies that have assessed the benefit of antitussives in adults, mainly codeine and  
40 dextromethorphan, have been performed in patients with acute cough in the context of upper  
41 airway infections, thus limiting the external validity to patients with acute bronchitis. The  
42 benefit of dextromethorphan in acute bronchitis is controversial. A review published by Parvez  
43 *et al.*, including 451 adults, found that a single dose of 30 mg of dextromethorphan reduced  
44 the number of cough bouts measured with a microphone by between 19% and 36% within the  
45 first 3 hours compared with placebo [18], but a meta-analysis of six studies in adults with  
46 upper airway infections found that a single dose of dextromethorphan was slightly more  
47 effective than placebo in terms of intensity, effort and latency within the first three hours after  
48 intake (between 12 and 17% more effective), although the clinical relevance of this  
49 observation is unclear [19]. Studies carried out with codeine in adults with acute bronchitis  
50 have not been shown to be beneficial [20]. In children, dextromethorphan has not proven to  
51 be more effective than placebo [21]. In a Scandinavian study conducted in 50 children followed  
52  
53  
54  
55  
56  
57  
58  
59  
60

1  
2  
3 for 3 days, the average cough score was slightly lower than placebo, although statistically  
4 significant differences were not observed between those taking the antitussive and those  
5 assigned to placebo [22]. Despite this, some guidelines recommend a short course of  
6 antitussives to reduce severe cough during acute illness in adults and children over the age of  
7 six, but evidence related to their effectiveness remains unclear [23].  
8  
9

10  
11  
12 A non-negligible percentage of patients with acute bronchitis present exaggerated bronchial  
13 responsiveness, which is mainly reported when the infection is caused by viruses and atypical  
14 germs [24]. However, a recent review does not support the routine use of  $\beta$ 2-adrenergic  
15 inhalers in patients with acute bronchitis [25]. On the other hand, in one of the clinical trials  
16 included in this review a significant improvement in symptom scores was observed in adults  
17 who received fenoterol 0.2 mg q.i.d for 7 days when there was bronchial hyper-reactiveness,  
18 wheezing or a decrease in FEV<sub>1</sub> compared to the same group of patients who had received  
19 placebo. This effect, however, was not observed among patients not presenting airflow  
20 obstruction [26]. This same effect has been described with inhaled anticholinergics, such as  
21 ipratropium and tiotropium alone or associated with  $\beta$ 2-agonists, but these studies were  
22 primarily conducted in patients with cough due to upper airway infections [27,28]. The release  
23 of acetylcholine in the airways by parasympathetic stimulation could trigger hyper-  
24 reactivity and increase mucosal secretion on the walls of the airways, and this might explain  
25 the possible antitussive properties of inhaled anticholinergic drugs [29]. Other drugs such as  
26 leukotriene inhibitors have not shown to be useful in acute cough [30]. Despite all these  
27 limitations, the guidelines recommend that bronchodilators can only be used in patients with  
28 bronchial hyper-reactiveness, outweighing the adverse effects, such as tremors or  
29 nervousness, that these drugs can cause [31].  
30  
31

32  
33  
34 In recent years, some studies using honey in children have found favourable results on the  
35 frequency of cough, patient quality of life and the quality of sleep of both parents and children.  
36 In a recent meta-analysis, including six clinical trials and a total of nearly 900 children, honey  
37 alleviated cough symptoms compared with no treatment or diphenhydramine, but was not  
38 found to be more effective than dextromethorphan. Apart from the limitations of the small  
39 sample sizes of these studies, most children received active treatment (different types of  
40 honey depending on the studies) for only one night, and studies evaluating their use in adult  
41 population are lacking [32]. There is no clear evidence that some types of honey have superior  
42 antimicrobial properties to others as described in some papers [33,34].  
43  
44

45  
46  
47 Therefore, we believe that this clinical trial is justified, since evidence of the benefit of these  
48 treatments in adults with acute bronchitis, with cough as a predominant symptom, is unclear.  
49  
50  
51  
52  
53  
54  
55  
56  
57  
58  
59  
60

1  
2  
3 We prioritize the use of dextromethorphan, as this antitussive is recommended by clinical  
4 guidelines at the usual dose of 15 mg t.i.d in the adult population, and ipratropium bromide  
5 inhalers, since the majority of studies carried out so far have considered  $\beta$ 2-agonists, with very  
6 poor results on effectiveness, and the fact that anticholinergics are frequently used in primary  
7 care in our country. In our study, we want to evaluate the effectiveness of honey at the  
8 recommended dose of 30 g t.i.d. in the adult population, since their benefit has only been  
9 explored in paediatrics. Unlike most published studies, these treatments will be recommended  
10 for a maximum of 14 days, because as discussed earlier the average duration of symptoms  
11 with cough due to acute bronchitis is 3 weeks.  
12  
13  
14  
15  
16  
17  
18  
19  
20

## 21 **OBJECTIVES**

22  
23 The main aim of the trial is to evaluate the clinical effectiveness of adding 3 symptomatic  
24 treatments (dextromethorphan, ipratropium bromide or honey) to usual care in reducing days  
25 with moderate-severe cough compared to usual care. The secondary objectives are aimed at  
26 evaluating the clinical effectiveness of adding 3 symptomatic treatments to usual care  
27 compared to usual care in the reduction of days: (1) with cough; (2) with moderate-severe  
28 daytime cough; (3) with moderate-severe nocturnal cough; (4) severe or moderate symptoms;  
29 (5) severe symptoms: (6) until the complete resolution of symptoms; (7) according to the  
30 baseline degree of bronchial hyper-reactiveness measured with peak-flow; and also (8) to  
31 evaluate the utilisation of antibiotics and different symptomatic treatments in the four arms;  
32 (9) to evaluate the number of days of absence from work in the four study arms; (10) to assess  
33 the number of times patients re-attend for symptoms related to the episode of acute  
34 bronchitis; (11) to assess the number of complications related to the episode of acute  
35 bronchitis; (12) to assess patient satisfaction in the four study arms; and (13) to assess the  
36 number of adverse events in the four study arms.  
37  
38  
39  
40  
41  
42  
43  
44  
45  
46  
47  
48

## 49 **METHODS AND ANALYSIS**

### 50 **Trial design**

51 This study is a phase IV, multicentre, pragmatic, parallel group, open randomised trial.  
52  
53  
54  
55  
56  
57

### 58 **Study arms**

59  
60

1  
2  
3 Once the patients are included in the trial, they will be randomised into one of the 4 treatment  
4 groups: (1) usual clinical practice group: (2) usual clinical practice + dextromethorphan (15 mg  
5 unit), one 15 mg-tablet t.i.d. up to a maximum of 14 days; (3) usual clinical practice +  
6 ipratropium bromide (20 µg each puff), 2 puffs t.i.d. up to a maximum of 14 days; and (4) usual  
7 clinical practice + 30 g of honey (one tablespoon) t.i.d. up to a maximum of 14 days; two 750  
8 mg bottles of wildflower honey (the most frequent type of honey used in our country) will be  
9 provided and patients will be recommended to add the honey to a cup of lemon or thyme  
10 juice, milk herbal tea, yogurt, herbal teas, etc. All the drugs and products used in this study are  
11 already marketed, and therefore, the manufacturers are responsible for the elaboration and  
12 control of samples. The study drugs will be provided free to the participants by the sponsor.  
13 The provision, secondary conditioning and distribution of the study drugs and products will be  
14 performed by the Barcelona Primary Care Pharmacy service. All the study drugs as well as the  
15 honey will be kept at room temperature. To improve compliance, participants will be asked to  
16 record their daily dosage in the symptom diary.  
17  
18  
19  
20  
21  
22  
23  
24  
25  
26  
27  
28

### 29 **Sample size**

30  
31 For the sample size calculation, a recent publication about delayed antibiotic prescribing  
32 carried out in Spain using the same symptom diaries with specific data from the group of  
33 patients with acute bronchitis has been considered, from which an average duration of 5.5  
34 days of moderate to severe cough was obtained, with a standard deviation of 4.5 days [35].  
35 Considering a reduction of 1.5 days as a clinically relevant outcome, a sample of 167 patients  
36 per group is estimated (a total of 668). The power to detect the difference was assumed to be  
37 0.8, with a two-sided significance level of 0.05. The allocation ratio of subjects into the groups  
38 is 1:1:1:1. We expect a 15% of loss to follow-up. Calculations have been performed with the  
39 aid of GRANMO software, version 7.12 April 2012  
40 (<https://www.imim.cat/ofertadeserveis/software-public/granmo/>).  
41  
42  
43  
44  
45  
46  
47  
48  
49  
50

### 51 **Recruitment**

52  
53 The trial will be conducted in different primary care centres in Catalonia, Spain. A large  
54 geographical area of practices throughout Catalonia will be invited to participate to maximise  
55 the generalisability of the sample of adults with uncomplicated acute bronchitis and to avoid  
56 saturation of research studies in some practices. The recruiting GPs will commence the study  
57 in January 2019 and will attempt to recruit all eligible patients until October 2020. Provided  
58  
59  
60

1  
2  
3 the necessary sample is met before this date, the recruitment period will end at the time of  
4 the inclusion of the last patient. The sponsor reserves the right to prematurely discontinue this  
5 trial at any time in case (1) the expected inclusion objectives are not met or (2) new  
6 information appears regarding the efficacy or safety of any of the study medications that could  
7 significantly affect the continuation of the trial or overrules the previous positive evaluation of  
8 the benefit-risk ratio.  
9  
10  
11  
12  
13  
14  
15

## 16 **Participants**

### 17 *Inclusion criteria*

18  
19  
20 Potential participants who meet the following criteria will be included in this trial: (1) age 18  
21 years or older, (2) symptoms of acute bronchitis, defined as an acute lower-respiratory-tract  
22 infection with cough as the predominant symptom, starting within 3 weeks before study  
23 inclusion, (3) patients who score  $\geq 4$  in either the daytime and/or nocturnal cough on a 7-point  
24 Likert scale, and (4) patients who consent to participate.  
25  
26  
27  
28  
29  
30

### 31 *Exclusion criteria*

32  
33 Patients with any of the following criteria will be excluded from this trial: (1) suspected  
34 pneumonia; if the professional suspects pneumonia, a chest X-ray will be recommended and  
35 the patient will be randomised if this diagnosis is discarded; (2) criteria for hospital admission  
36 (impaired consciousness, respiratory rate  $> 30$  breaths/minute, pulse  $> 125$  beats/minute,  
37 systolic blood pressure  $< 90$  mm Hg or diastolic blood pressure  $< 60$  mm Hg, temperature  $> 40^{\circ}\text{C}$   
38 or oxygen saturation  $< 92\%$ ); (3) pregnancy or breast feeding; (4) baseline respiratory disease  
39 such as chronic obstructive pulmonary disease, asthma, tuberculosis or bronchiectasis; (5)  
40 associated significant comorbidity, such as moderate-severe heart failure, dementia, acute  
41 myocardial infarction/recent cerebral vascular accident ( $< 3$  months), severe liver failure,  
42 severe renal failure; (6) immunosuppression, such as chronic infection by HIV, transplanted,  
43 neutropenic, or patients receiving immunosuppressive treatment; (7) active neoplasm; (8)  
44 terminal illness; (9) history of intolerance or allergy to any of the study treatments; (10)  
45 patients in whom, in the opinion of the investigator, treatment with dextromethorphan,  
46 ipratropium bromide or honey is contraindicated; (11) patients living in long-term institutions;  
47 (12) difficulty in conducting scheduled follow-up visits.  
48  
49  
50  
51  
52  
53  
54  
55  
56  
57  
58  
59  
60

1  
2  
3 Following the usual clinical practice, participating GPs may prescribe the concomitant therapy  
4 they consider appropriate, including analgesics such as NSAIDs or paracetamol, mucolytics,  
5 expectorants, antihistamines and also antibiotics. However, they will not be allowed to  
6 prescribe antitussives, including codeine, anticholinergic inhalers and they will not be allowed  
7 to recommend the use of honey, including honey candies, tablets or infusions with honey. All  
8 drug information (name of product, purpose of administration, dosage, duration of  
9 administration, etc) will be recorded on the patient case report form (CRF) and patients will fill  
10 out any other treatment they obtain or purchase from the pharmacy in their symptom diaries.  
11  
12  
13  
14  
15  
16  
17  
18

### 19 **Randomisation**

20  
21 Patients will be assigned sequentially as they enter the study. Randomisation of patients will  
22 be performed by registering the patient in an electronic CRF during the index visit. Patients will  
23 be stratified based on the previous duration of symptoms ( $\leq 1$  week;  $> 1$  week). Once a patient  
24 is included in the trial and the randomisation has been centrally made, the investigator will  
25 provide the assigned treatment and record the dispensing and medication code in the  
26 electronic CRF. Since this is a multicentre study, a block procedure will be performed to assign  
27 patients to each of the health centres at a 1:1:1:1 ratio.  
28  
29  
30  
31  
32  
33  
34  
35

### 36 **Blinding**

37  
38 This is an open study. Neither physicians nor patients will be blind to the patient's assignment  
39 to the study group. The open nature of the clinical trial ensures that the results obtained in this  
40 study are very close to the reality of primary care, considering that both the participating GPs  
41 and the patients with uncomplicated acute bronchitis will be aware of the treatment given.  
42  
43 However, the main outcome will be assessed by the patients themselves.  
44  
45  
46  
47  
48

### 49 **Outcome measures**

#### 50 *Primary outcome*

51  
52 Duration (days) of moderate-severe cough in days. Each symptom will be scored by the patient  
53 on a 7-point Likert scale (0=not affected; 1=very little problem; 2=slight problem;  
54 3=moderately bad; 4=bad; 5=very bad; 6=as bad as it could be). The number of days until the  
55 last day the patient scores 3 in either daytime cough or nocturnal cough in the paper-based  
56  
57  
58  
59  
60

1  
2  
3 symptom diary will be considered for the main outcome. We will use validated questionnaires,  
4 which have also been used in a previous study [36].  
5  
6  
7

### 8 9 *Secondary outcomes*

10  
11 Different secondary outcomes will be taken into account: (1) duration of symptoms (number of  
12 days until the last day the patient scores 2 in any of the symptoms); (2) duration of moderate-  
13 severe daytime cough (number of days until the last day the patient scores 3 in daytime  
14 cough); (3) duration of moderate-severe nocturnal cough (number of days until the last day  
15 the patient scores 3 in nocturnal cough); (4) duration of cough (number of days until the last  
16 day the patient scores 2 in either daytime or nocturnal cough); (5) duration of severe  
17 symptoms (number of days until the last day the patient scores 5 in any of the symptoms); (6)  
18 duration of moderate-severe symptoms (number of days until the last day the patient scores 3  
19 in any of the symptoms); (7) duration of moderate-severe cough in days according to the basal  
20 degree of bronchial hyper-reactiveness at the baseline visit, measured with peak flow (the  
21 greatest of three determinations will be considered); (8) utilisation of antibiotics and other  
22 symptomatic therapies within the first 4 weeks; (9) duration of work or school absenteeism  
23 due to the episode of acute bronchitis; (10) number of re-attendances to any doctor regarding  
24 the episode of acute bronchitis within the first 4 weeks; (11) number of complications related  
25 to the episode of acute bronchitis within the first 4 weeks, such as pneumonias, visits to  
26 emergency departments, hospital admissions; (12) patient satisfaction; and (13) adverse  
27 reactions.  
28  
29  
30  
31  
32  
33  
34  
35  
36  
37  
38  
39  
40  
41  
42

### 43 *Withdrawal*

44  
45 Patients will be free to withdraw from the study at any time for any reason without prejudice  
46 to future care, and with no obligation to provide the reason for withdrawal. In addition, the  
47 investigator may withdraw a participant from the trial at any time if deemed necessary by any  
48 of the following reasons: (1) intercurrent process or illness that in the opinion of the  
49 investigator requires the withdrawal of the patient's treatment, (2) the presence of an adverse  
50 event that requires the withdrawal of the patient's treatment, (3) those who require a  
51 concomitant treatment not allowed during study participation (antitussives, anticholinergic  
52 inhalers, honey), or (4) protocol violation.  
53  
54  
55  
56  
57

58  
59 During the trial, patients will be asked to inform about any signs of worsening symptoms, and  
60 investigators will evaluate appropriate measures if they need additional therapy. Since this is a



1  
2  
3 pragmatic trial, patients who decide interrupting the study drug treatment but want to  
4 continue with the study procedures, will be followed in the same way as the other patients.  
5  
6  
7  
8

### 9 **Data management and monitoring**

10  
11 The investigators will follow the standard operating procedures of the trial for better quality of  
12 assessment and outcome data collection. The investigators who evaluate outcome measures  
13 should be restricted to only those GPs who have attended the training meetings. All  
14 assessment data and case reports will be collected at baseline (day 1) and at the various  
15 follow-up visits in the intervention arms and control group. Collected documents and data will  
16 be managed by electronic CRF. Only the principal investigator or those who have permission  
17 will be able to access the data. The CRFs and other documents will be stored at a separate and  
18 secure location for 25 years after trial completion. Multicentre clinical trial monitoring will be  
19 conducted via periodic on-site/online visits, and all the patients recruited will be monitored  
20 following a risk approach monitoring plan.  
21  
22  
23  
24  
25  
26  
27  
28  
29  
30

### 31 **Ascertainment of visits**

32  
33 The patients will be randomised to one of the 4 treatment strategies. To standardise data  
34 collection, all of the participating GPs will be trained by the coordinating centre. The patients  
35 will receive information on the study by the participating GPs, and if they are interested in  
36 participating, they will be provided with an informed consent form to read and sign. A  
37 maximum length of 10-15 minutes is expected for the interview, randomisation and the  
38 introduction of the data. The participating GPs will explain the study scheme and the visit  
39 programme to the patient (Table 1). After randomisation, information on the strategy to which  
40 they have been allocated will be given to the participants, and they will be given the free study  
41 medication and will be informed as to the appropriate measures to take in case of worsening  
42 or no improvement of their condition. In addition, they will be given a paper-based diary to be  
43 completed by themselves on a daily basis. The information collected in the diary includes:  
44 times in which study medication is taken, concomitant treatments used and a questionnaire of  
45 symptoms, which has been previously used in other studies [35]. Patients will complete the  
46 diary while symptoms related to the respiratory condition are present.  
47  
48  
49  
50  
51  
52  
53  
54  
55

56  
57 GPs will call patients 2 to 3 days after their inclusion in the study to monitor their progress and  
58 resolve possible doubts regarding the completion of the diary. Patients will be scheduled for a  
59 second visit at day 15 (two weeks after the patient inclusion) to evaluate their clinical  
60

1  
2  
3 evolution. Depending on the patient's clinical evolution, the follow-up will be different: (1)  
4 clinical cure, defined as absence of symptoms; the diary will be collected and they will be  
5 called two weeks later to check if they have sought medical advice again due to the episode of  
6 acute bronchitis; (2) clinical improvement, defined as the persistence of symptoms but with  
7 improvement with respect to the index visit. Patients will be given a new symptom diary to be  
8 completed in the following 14 days and will be asked to return at day 29 to evaluate their  
9 condition. Participating GPs may prescribe any of the medications allowed by the study  
10 protocol, the same treatment as that which was previously received by the patient, or nothing  
11 if not necessary. If the doctor deems it necessary to prescribe any of the therapies under study  
12 (with the exception of the arm in which the patient is located), the patient will discontinue the  
13 trial and follow the usual clinical practice; (3) failure, when the patient is worse or presents the  
14 same symptoms as those presented at the index visit; patients will be withdrawn from the  
15 study and will be managed according to the clinician's best judgement. At day 29, patients who  
16 improved at day 15 will be similarly categorised as (1) clinical cure; (2) improvement; or (3)  
17 failure. Patients with clinical cure or improvement will be contacted again at day 43 (six weeks  
18 after the baseline visit) to record if they have consulted with a professional regarding the  
19 episode of cough and to assess safety (Figure 1).  
20  
21  
22  
23  
24  
25  
26  
27  
28  
29  
30  
31  
32  
33  
34  
35

### 36 **Statistical analysis**

37 The characteristics of the study population will be described using frequencies for categorical  
38 variables and mean and standard deviation for quantitative variables. To compare the  
39 different strategies with the usual treatment, we will use the chi-square tests for categorical  
40 variables and the Student t-test and variance analysis for continuous variables. Effectiveness  
41 evaluation will be primarily based on intention-to-treat (ITT) analysis in such a way that any  
42 event in any patient will be included in the group to which the patient was randomised, and  
43 per protocol (PP) analysis will be used as a secondary analysis. ITT analysis will be conducted in  
44 all subjects randomised, and PP analysis will be conducted in those who complete the entire  
45 trial without violating the protocol.  
46  
47  
48  
49  
50

51 To avoid the effect of potential confounders, the effectiveness of each treatment with respect  
52 to the usual clinical practice will be analysed through Cox proportional risk survival analysis,  
53 reporting both crude and adjusted relative risk. The effect of the treatment will be adjusted for  
54 variables collected at baseline, such as age, gender, ethnicity, smoking status, alcohol  
55  
56  
57  
58  
59  
60

1  
2  
3 consumption, peak-flow measurement, previous treatment, previous vaccination, comorbidity  
4 and previous number of acute bronchitis.  
5

6  
7 Censoring and missing data: Those who discontinue, miss follow-up or, for whatever reason,  
8 are not evaluated for the main variable will be considered censored at the last follow-up date.  
9

10 In addition, patients who do not show symptoms of improvement along the study will also be  
11 censored at the last day of follow-up. We do not plan to make imputation of missing data.  
12

13  
14 Sub-analysis: To assess the consistency of the data collected by telephone (in subjects not  
15 attending the visit of the 15th and 29th), a sub-analysis will be carried out using only the data  
16 from the diary. A sub-analysis with the patients taking antibiotics will also be studied.  
17

18  
19 All the analyses will be done with the statistical software R (version 3.2 or higher) and the level  
20 of significance will be 0.05.  
21  
22

## 23 24 25 **Patient and public involvement**

26  
27 Patients and the public are not actively involved in the process of this study. However, the  
28 participants will be informed of the study results at the end of the trial.  
29  
30  
31

## 32 33 **ETHICS AND DISSEMINATION**

### 34 35 **Ethical issues**

36  
37 The trial will be conducted in accordance with the Declaration of Helsinki and Good Clinical  
38 Practice guidelines and Consolidated Standards of Reporting Trials guidelines. If the protocol  
39 needs relevant modifications, the investigators are required to inform the institutional review  
40 board (IDIAP Jordi Gol, Barcelona, Spain) and the Spanish Agency of Medicines and Healthcare  
41 Products (AEMPS) as well as participants and receive reapproval. Before the trial, investigators  
42 are required to provide all information related to the clinical trial to every patient, including  
43 the possible benefits and harms, other therapeutic choices and right to withdraw, via a written  
44 consent form approved by the institutional review board. After being provided with enough  
45 time and opportunity to ask questions and decide whether or not to participate, written  
46 informed consent will be obtained from all participants before study inclusion. Data  
47 confidentiality will be ensured at all times, as stated in the researcher's commitment sheet, as  
48 will compliance with the current legislation regarding the protection of personal data. This is a  
49 clinical trial based on the outpatient setting, and neither patients nor researchers will receive  
50  
51  
52  
53  
54  
55  
56  
57  
58  
59  
60

1  
2  
3 any monetary compensation. The trial has been registered with the National Institutes of  
4 Health (NIH) trial registry (NCT03738917).  
5  
6  
7  
8

### 9 **Adverse events and serious adverse events**

10  
11 This is a low intervention clinical trial meaning that the drugs administered are used in  
12 accordance with the terms of the marketing authorisation with a well-known safety profile and  
13 that the intervention on the patient poses no additional risk to the subject compared to usual  
14 clinical practice. The study medications used in this clinical trial have been widely prescribed  
15 and consumed for a long time, and the safety profile of these drugs is well-documented.  
16  
17  
18

19  
20 Adverse events will be recorded and followed if they are found to be serious (SAEs) or/and  
21 related to the study drug (AR). The occurrence of this kind of adverse events will be monitored.  
22  
23 The rest of the adverse events will be treated as they are during the normal clinical practice,  
24 but will not be collected in the CRF.  
25  
26  
27  
28  
29

### 30 **Dissemination**

31  
32 A range of dissemination activities are planned at national and international conferences. At  
33 the end of the trial, we will publish the final report in an open access peer-review journal even  
34 in the case of negative results, and the study results will also be disseminated via conference  
35 presentations. A summary of the findings will be sent to the participating practices on  
36 completion of the AB4T study, and the participants will also be informed of the results.  
37  
38  
39  
40  
41  
42

### 43 **DISCUSSION**

44  
45 Acute bronchitis is the most common respiratory tract infection seen in outpatient  
46 departments as approximately 5% of the general population develop this infectious condition.  
47  
48 Despite problems associated with antibiotic overuse in Western countries and the substantial  
49 economic burden associated with acute bronchitis, currently no definitive medication is  
50 recommended. There are many studies exploring the efficacy of symptomatic therapies, but  
51 different systematic reviews evaluating the effectiveness of antitussives, bronchodilators,  
52 herbs and natural remedies found that there was insufficient evidence to support the use of  
53 these treatments because of the high risk of bias, small sample sizes and the heterogeneity of  
54 the patients included in these studies as many of these patients had an infection other than  
55 acute bronchitis. This study is a multicentre, pragmatic, parallel group, open randomised  
56  
57  
58  
59  
60

1  
2  
3 placebo-controlled trial to evaluate the efficacy and safety of usual care plus three different  
4 symptomatic treatments that are widely consumed by patients with acute cough due to an  
5 uncomplicated lower respiratory tract infection in a rigorous and adequately powered study.  
6  
7

8  
9 There are some limitations to this protocol. A microbiological study is not carried out, but since  
10 nearly 90% of the episodes of acute bronchitis are of viral aetiology, treatment with antibiotics  
11 is not indicated and the microbiological study is therefore not necessary, similar to the usual  
12 practice in primary care, in which this procedure is not routinely performed. In addition, the  
13 study is pragmatic and replicates current primary care. It is an open and unblinded study, in  
14 which doctors and patients will know the randomised study treatment assigned. The main  
15 objective of this study, as well as some of the secondary objectives are based on information  
16 provided by the patients themselves in the symptom diaries. However, at the baseline visit,  
17 GPs will be encouraged to explain how to fill in the diaries and will supervise how patients  
18 register the symptom diary. They will ask patients to return them at the various follow-up visits  
19 (days 15 and 29). We have previously found that the diary return rate is greater if we make  
20 patients come to follow-up visits. Notwithstanding, in the case of patients not returning the  
21 diaries, the doctor will contact them by phone to complete a short form in which the main  
22 study variables will be collected, in an attempt to minimise the number of losses.  
23  
24  
25  
26  
27  
28  
29  
30  
31  
32  
33  
34

### 35 **Contributors**

36  
37 JMC, AGS, RM and CL drafted the research protocol and both AGS and CL wrote the  
38 manuscript. AM, AGS, RM, HP, AGL, and CL were involved in the protocol development. JMC,  
39 AM, JP, CB, MPA, and CL will be involved in trial conduct and recruitment. DO contributed to  
40 the statistical design and analysis. All authors have contributed to the conception of this  
41 clinical trial.  
42  
43  
44  
45  
46  
47

### 48 **Funding**

49  
50 The AB4T study received a research grant from the Carlos III Institute of Health (ISCIII), Ministry  
51 of Economy and Competitiveness (Spain), awarded on the 2017 call under the Health Strategy  
52 Action 2013-2016, within the National Research Program oriented to Societal Challenges,  
53 within the Technical, Scientific and Innovation Research National Plan 2013-2016, with  
54 reference PI17/01345, co-funded with European Union ERDF funds (European Regional  
55 Development Fund).  
56  
57  
58  
59  
60

1  
2  
3 This study is also supported by the Spanish Clinical Research Network (SCReN), funded by  
4 ISCIII-Subdirección General de Evaluación y Fomento de la Investigación, project number  
5 PT17/0017/0005, within the National Research Program I+D+I 2013-2016 and co-funded with  
6 European Union ERDF funds (European Regional Development Fund).  
7  
8  
9

### 10 11 12 **Competing interests**

13  
14 AM and CL report receiving research grants from Abbott Diagnostics. The other authors have  
15 nothing to declare.  
16  
17

### 18 19 20 **Patient consent**

21  
22 Obtained.  
23  
24  
25

### 26 27 **REFERENCES**

- 28  
29  
30  
31  
32  
33  
34  
35  
36  
37  
38  
39  
40  
41  
42  
43  
44  
45  
46  
47  
48  
49  
50  
51  
52  
53  
54  
55  
56  
57  
58  
59  
60
1. Woodhead M, Blasi F, Ewig S, et al; Joint Taskforce of the European Respiratory Society and European Society for Clinical Microbiology and Infectious Diseases. Guidelines for the management of adult lower respiratory tract infections - full version. *Clin Microbiol Infect* 2011;17(Suppl.6):E1-E59.
  2. Macfarlane J, Holmes W, Gard P, et al. Prospective study of the incidence, aetiology and outcome of adult lower respiratory tract illness in the community. *Thorax* 2001;56:109-14.
  3. Albert RH. Diagnosis and treatment of acute bronchitis. *Am Fam Physician* 2010;82:1345-50.
  4. Tackett KL, Atkins A. Evidence-based acute bronchitis therapy. *J Pharm Pract* 2012;25:586-90.
  5. Chalmers JD, Hill AT. Investigation of “non-responding” presumed lower respiratory tract infection in primary care. *BMJ* 2011;343:d5840.
  6. Smith SM, Fahey T, Smucny J, Becker LA. Antibiotics for acute bronchitis. *Cochrane Database Syst Rev* 2017;6:CD000245.
  7. Hamoen M, Broekhuizen BD, Little P, Melbye H, Coenen S, Goossens H; GRACE clinical study group. Medication use in European primary care patients with lower respiratory tract infection: an observational study. *Br J Gen Pract* 2014;64:e81-91.

- 1
  - 2
  - 3
  - 4
  - 5
  - 6
  - 7
  - 8
  - 9
  - 10
  - 11
  - 12
  - 13
  - 14
  - 15
  - 16
  - 17
  - 18
  - 19
  - 20
  - 21
  - 22
  - 23
  - 24
  - 25
  - 26
  - 27
  - 28
  - 29
  - 30
  - 31
  - 32
  - 33
  - 34
  - 35
  - 36
  - 37
  - 38
  - 39
  - 40
  - 41
  - 42
  - 43
  - 44
  - 45
  - 46
  - 47
  - 48
  - 49
  - 50
  - 51
  - 52
  - 53
  - 54
  - 55
  - 56
  - 57
  - 58
  - 59
  - 60
8. Smith SM, Schroeder K, Fahey T. Over-the-counter (OTC) medications for acute cough in children and adults in community settings. *Cochrane Database Syst Rev* 2014;11:CD001831.
9. Morice A, Abdul-Manap R. Drug treatments for coughs and colds. *Prescriber* 1998;9:74-9.
10. Llor C, Moragas A, Bayona C, et al. Efficacy of anti-inflammatory or antibiotic treatment in patients with non-complicated acute bronchitis and discoloured sputum: randomised placebo controlled trial. *BMJ* 2013;347:f5762.
11. Little P, Moore M, Kelly J, et al; PIPS Investigators. Ibuprofen, paracetamol, and steam for patients with respiratory tract infections in primary care: pragmatic randomised factorial trial. *BMJ* 2013;347:f6041.
12. El-Gohary M, Hay AD, Coventry P, Moore M, Stuart B, Little P. Corticosteroids for acute and subacute cough following respiratory tract infection: a systematic review. *Fam Pract* 2013;30:492-500.
13. Björnsdóttir I, Einarson TR, Guðmundsson LS, Einarisdóttir RA. Efficacy of diphenhydramine against cough in humans: a review. *Pharm World Sci* 2007;29:577-83.
14. Yale SH, Liu K. Echinacea purpurea therapy for the treatment of the common cold: a randomized, double-blind, placebo-controlled clinical trial. *Arch Intern Med* 2004;164:1237-41.
15. Timmer A, Günther J, Motschall E, Rucker G, Antes G, Kern WV. Pelargonium sidoides extract for treating acute respiratory tract infections. *Cochrane Database Syst Rev* 2013;10:CD006323.
16. Jiang L, Li K, Wu T. Chinese medicinal herbs for acute bronchitis. *Cochrane Database Syst Rev* 2012;2:CD004560.
17. Holzinger F, Chenot JF. Systematic review of clinical trials assessing the effectiveness of ivy leaf (*hedera helix*) for acute upper respiratory tract infections. *Evid Based Complement Alternat Med* 2011;2011:1-9.
18. Parvez L, Vaidya M, Sakhardande A, Subburaj S, Rajagopalan TG. Evaluation of antitussive agents in man. *Pulm Pharmacol* 1996;9:299-308.
19. Pavesi L, Subburaj S, Porter-Shaw K. Application and validation of a computerized cough acquisition system for objective monitoring of acute cough: a meta-analysis. *Chest* 2001;120:1121-8.
20. Freestone C, Eccles R. Assessment of the antitussive efficacy of codeine in cough associated with common cold. *J Pharm Pharmacol* 1997;49:1045-9.

- 1  
2  
3 21. Paul IM, Yoder KE, Crowell KR, et al. Effect of dextromethorphan, diphenhydramine, and  
4 placebo on nocturnal cough and sleep quality for coughing children and their parents.  
5 Pediatrics 2004;114:e85-e90.  
6  
7
- 8 22. Korppi M, Laurikainen K, Pietikainen M, Silvasti M. Antitussives in the treatment of acute  
9 transient cough in children. Acta Paediatr Scand 1991;80:969-71.  
10
- 11 23. Braman SS. Chronic cough due to acute bronchitis: ACCP evidence-based clinical practice  
12 guidelines. Chest 2006;129:95S-103S.  
13
- 14 24. Melbye H, Kongerud J, Vorland L. Reversible airflow limitation in adults with respiratory  
15 infection. Eur Respir J 1994;7:1239-45.  
16
- 17 25. Becker LA, Hom J, Villasis-Keever M, van der Wouden JC. Beta2-agonists for acute cough or  
18 a clinical diagnosis of acute bronchitis. Cochrane Database Syst Rev 2015;9:CD001726.  
19
- 20 26. Melbye H, Aasebø U, Straume B. Symptomatic effect of inhaled fenoterol in acute  
21 bronchitis: a placebo-controlled double-blind study. Fam Pract 1991;8:216-22.  
22
- 23 27. Higebottam TW. Anticholinergics and cough. Postgrad Med J 1987;63(Suppl 1):75-8.  
24
- 25 28. Zanasi A, Lecchi M, del Forno M, et al. A randomized placebo-controlled, double-blind trial  
26 on the management of post-infective cough by inhaled ipratropium and salbutamol  
27 administered in combination. Pulm Pharmacol Ther 2014;29:224-32.  
28
- 29 29. Coulson FR, Fryer AD. Muscarinic acetylcholine receptors and airway diseases. Pharmacol  
30 Ther 2003;98:59-69.  
31
- 32 30. Wang K, Birring SS, Taylor K, et al. Montelukast for post-infectious cough in adults: a  
33 double-blind randomised placebo-controlled trial. Lancet Respir Med 2014;2:35-43.  
34
- 35 31. Cayley WE. Beta2 agonists for acute cough or a clinical diagnosis of acute bronchitis. Am  
36 Fam Physician 2017;95:551.  
37
- 38 32. Oduwole O, Udoh EE, Oyo-Ita A, Meremikwu MM. Honey for acute cough in children.  
39 Cochrane Database Syst Rev 2018;4:CD007094.  
40
- 41 33. Khan RU, Naz S, Abudabos AM. Towards a better understanding of the therapeutic  
42 applications and corresponding mechanisms of action of honey. Environ Sci Pollut Res Int  
43 2017;24:27755–27766.  
44
- 45 34. Lusby PE, Coombes AL, Wilkinson JM. Bactericidal activity of different honeys against  
46 pathogenic bacteria. Arch Med Res 2005;36:464–7.  
47
- 48 35. de la Poza Abad M, Mas Dalmau G, Moreno Bakedano M, et al; Delayed Antibiotic  
49 Prescription (DAP) Group. Prescription strategies in acute uncomplicated respiratory  
50 infections: A randomized clinical trial. JAMA Intern Med 2016;176:21-9.  
51
- 52 36. de la Poza Abad M, Mas Dalmau G, Moreno Bakedano M, et al. Rationale, design and  
53 organization of the delayed antibiotic prescription (DAP) trial: a randomized controlled  
54  
55  
56  
57  
58  
59  
60



1  
2  
3  
4  
5  
6  
7  
8  
9  
10  
11  
12  
13  
14  
15  
16  
17  
18  
19  
20  
21  
22  
23  
24  
25  
26  
27  
28  
29  
30  
31  
32  
33  
34  
35  
36  
37  
38  
39  
40  
41  
42  
43  
44  
45  
46  
47  
48  
49  
50  
51  
52  
53  
54  
55  
56  
57  
58  
59  
60

trial of the efficacy and safety of delayed antibiotic prescribing strategies in the non-complicated acute respiratory tract infections in general practice. BMC Fam Pract. 2013 May 19;14:63.

For peer review only

**Table 1. Timetable of study period.**

| Day                                                                                                                 | Day 1   | Day 2-4       | Day 15  | Day 29 <sup>a</sup> |               | Day 43 <sup>b</sup> |
|---------------------------------------------------------------------------------------------------------------------|---------|---------------|---------|---------------------|---------------|---------------------|
| Visit                                                                                                               | Visit 1 | Phone visit 1 | Visit 2 | Visit 3             | Phone visit 2 | Phone visit 3       |
| Visit at the centre                                                                                                 | X       |               | X       | X <sup>c</sup>      |               |                     |
| Medical history and physical examination                                                                            | X       |               |         |                     |               |                     |
| Explanation of the study and informed consent                                                                       | X       |               |         |                     |               |                     |
| Initial CRF                                                                                                         | X       |               |         |                     |               |                     |
| Randomisation                                                                                                       | X       |               |         |                     |               |                     |
| Dispensing the study treatment                                                                                      | X       |               |         |                     |               |                     |
| Peak flow determination                                                                                             | X       |               |         |                     |               |                     |
| Giving out of the first symptom diary, up to day 15                                                                 | X       |               |         |                     |               |                     |
| Assessment of the clinical outcome                                                                                  |         | X             | X       | X                   | X             | X                   |
| Adherence to the study drug                                                                                         |         | X             | X       |                     |               |                     |
| Evaluation of adverse events                                                                                        |         | X             | X       | X                   | X             | X                   |
| Collection of the first symptom diary and giving out of the second symptom diary from day 16 to day 29 <sup>d</sup> |         |               | X       |                     |               |                     |
| Collection of the second symptom diary                                                                              |         |               |         | X                   |               |                     |
| Evaluation of re-attendance to healthcare services due to infectious condition                                      |         | X             | X       | X                   | X             | X                   |

|                             |  |   |   |   |   |   |
|-----------------------------|--|---|---|---|---|---|
| Evaluation of complications |  | X | X | X | X | X |
|-----------------------------|--|---|---|---|---|---|

<sup>a</sup>Final visit if the symptoms have disappeared.

<sup>b</sup>Only if the visit at day 29 is at the centre and a cure or improvement is recorded.

<sup>c</sup>Phone visit if a cure is recorded at day 15.

<sup>d</sup>Only if the patient still has symptoms of infection (improvement).

For peer review only

1  
2  
3 **Figure 1.** Study scheme.  
4  
5  
6  
7  
8  
9  
10  
11  
12  
13  
14  
15  
16  
17  
18  
19  
20  
21  
22  
23  
24  
25  
26  
27  
28  
29  
30  
31  
32  
33  
34  
35  
36  
37  
38  
39  
40  
41  
42  
43  
44  
45  
46  
47  
48  
49  
50  
51  
52  
53  
54  
55  
56  
57  
58  
59  
60

For peer review only

1  
2  
3  
4  
5  
6  
7  
8  
9  
10  
11  
12  
13  
14  
15  
16  
17  
18  
19  
20  
21  
22  
23  
24  
25  
26  
27  
28  
29  
30  
31  
32  
33  
34  
35  
36  
37  
38  
39  
40  
41  
42  
43  
44  
45  
46

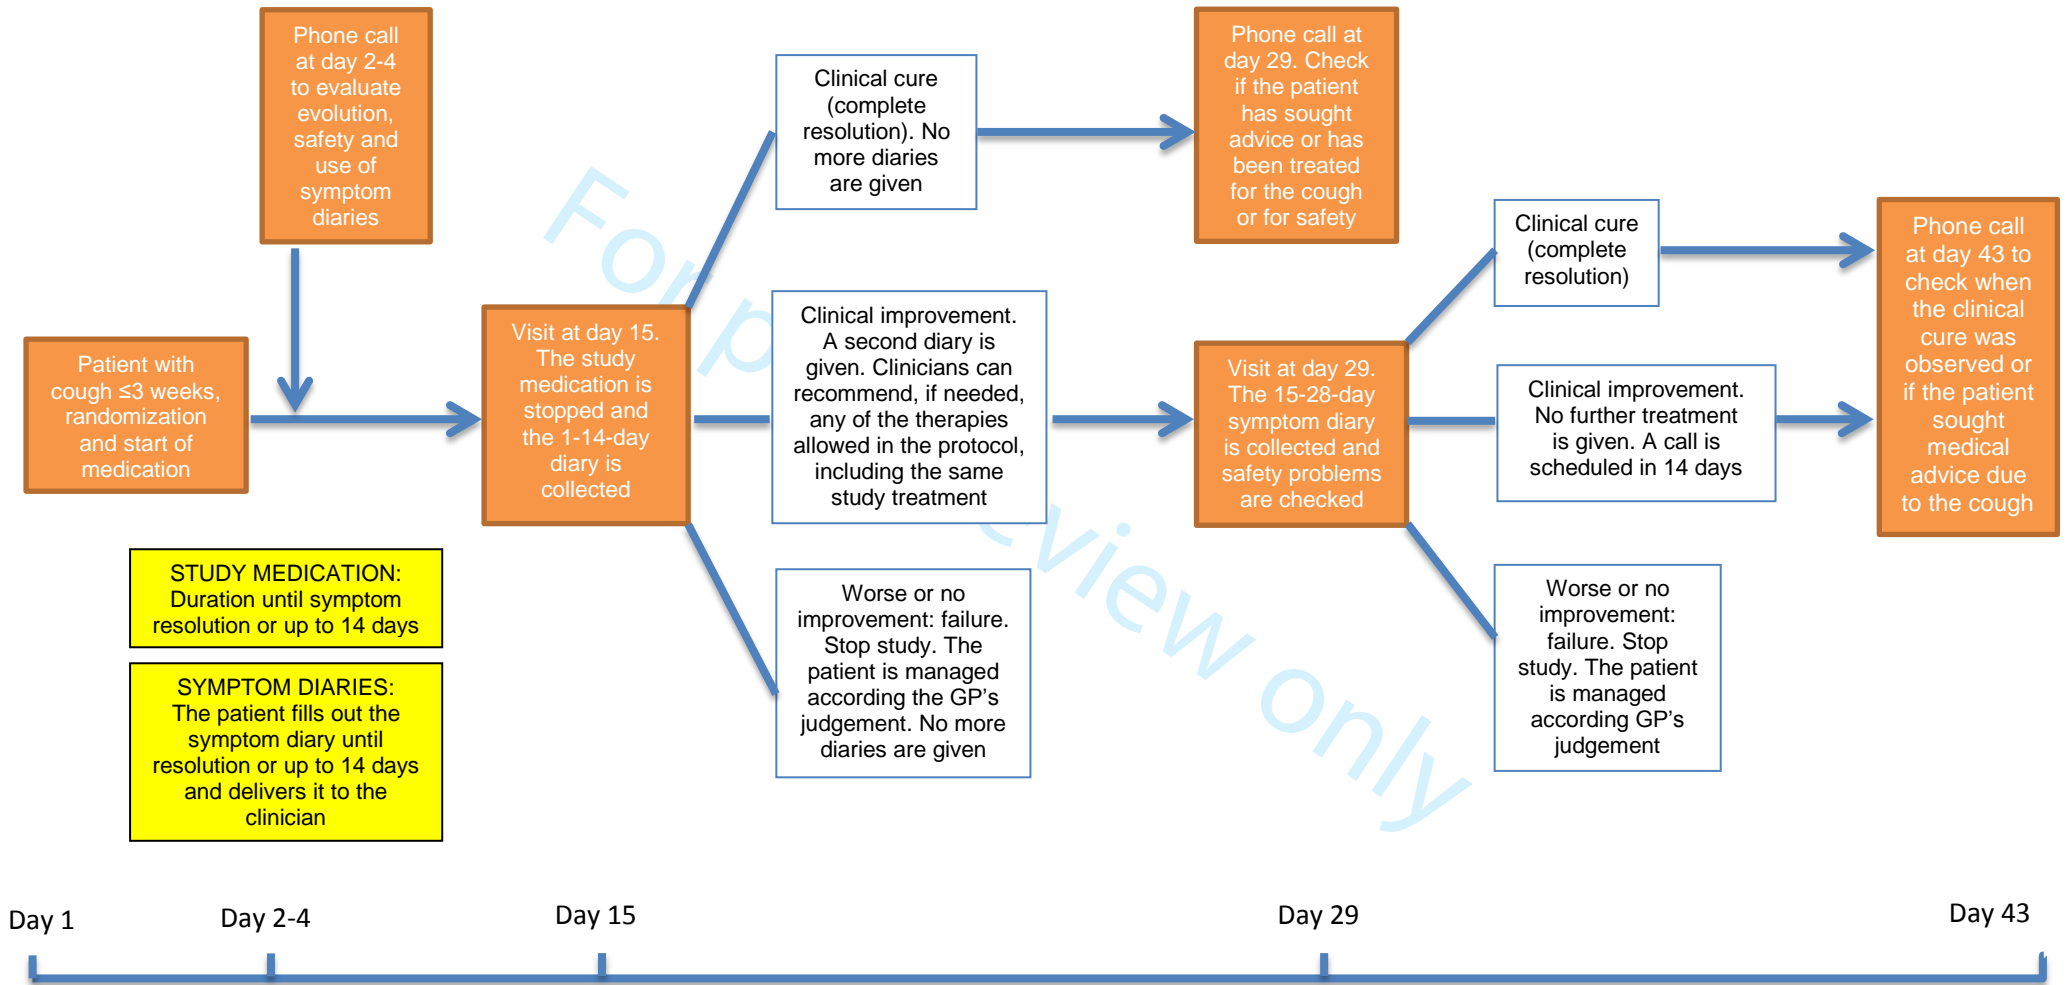

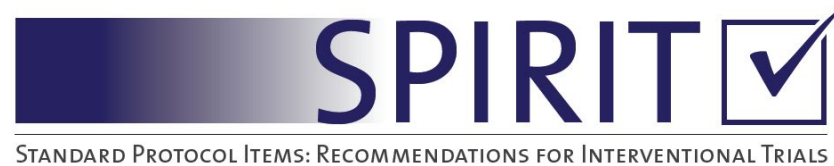

SPIRIT 2013 Checklist: Recommended items to address in a clinical trial protocol and related documents\*

| Section/item                      | Item No | Description                                                                                                                                                                                                                                                                              | Addressed on page number |
|-----------------------------------|---------|------------------------------------------------------------------------------------------------------------------------------------------------------------------------------------------------------------------------------------------------------------------------------------------|--------------------------|
| <b>Administrative information</b> |         |                                                                                                                                                                                                                                                                                          |                          |
| Title                             | 1       | Descriptive title identifying the study design, population, interventions, and, if applicable, trial acronym                                                                                                                                                                             | ___ 1 ___                |
| Trial registration                | 2a      | Trial identifier and registry name. If not yet registered, name of intended registry                                                                                                                                                                                                     | ___ 3 ___                |
|                                   | 2b      | All items from the World Health Organization Trial Registration Data Set                                                                                                                                                                                                                 | ___ NA ___               |
| Protocol version                  | 3       | Date and version identifier                                                                                                                                                                                                                                                              | ___ 1 ___                |
| Funding                           | 4       | Sources and types of financial, material, and other support                                                                                                                                                                                                                              | ___ 16 ___               |
| Roles and responsibilities        | 5a      | Names, affiliations, and roles of protocol contributors                                                                                                                                                                                                                                  | ___ 16 ___               |
|                                   | 5b      | Name and contact information for the trial sponsor                                                                                                                                                                                                                                       | ___ 16 ___               |
|                                   | 5c      | Role of study sponsor and funders, if any, in study design; collection, management, analysis, and interpretation of data; writing of the report; and the decision to submit the report for publication, including whether they will have ultimate authority over any of these activities | ___ 16 ___               |
|                                   | 5d      | Composition, roles, and responsibilities of the coordinating centre, steering committee, endpoint adjudication committee, data management team, and other individuals or groups overseeing the trial, if applicable (see Item 21a for data monitoring committee)                         | ___ 16 ___               |

|    |                                                           |     |                                                                                                               |                   |
|----|-----------------------------------------------------------|-----|---------------------------------------------------------------------------------------------------------------|-------------------|
| 1  | <b>Introduction</b>                                       |     |                                                                                                               |                   |
| 2  |                                                           |     |                                                                                                               |                   |
| 3  | Background and                                            | 6a  | Description of research question and justification for undertaking the trial, including summary of relevant   | ___ 4-7 ___       |
| 4  | rationale                                                 |     | studies (published and unpublished) examining benefits and harms for each intervention                        |                   |
| 5  |                                                           |     |                                                                                                               |                   |
| 6  |                                                           | 6b  | Explanation for choice of comparators                                                                         | ___ 4-7 ___       |
| 7  |                                                           |     |                                                                                                               |                   |
| 8  | Objectives                                                | 7   | Specific objectives or hypotheses                                                                             | ___ 7 ___         |
| 9  |                                                           |     |                                                                                                               |                   |
| 10 | Trial design                                              | 8   | Description of trial design including type of trial (eg, parallel group, crossover, factorial, single group), |                   |
| 11 |                                                           |     | allocation ratio, and framework (eg, superiority, equivalence, noninferiority, exploratory)                   | ___ 7,8 ___       |
| 12 |                                                           |     |                                                                                                               |                   |
| 13 |                                                           |     |                                                                                                               |                   |
| 14 | <b>Methods: Participants, interventions, and outcomes</b> |     |                                                                                                               |                   |
| 15 |                                                           |     |                                                                                                               |                   |
| 16 | Study setting                                             | 9   | Description of study settings (eg, community clinic, academic hospital) and list of countries where data will | ___ 7 ___         |
| 17 |                                                           |     | be collected. Reference to where list of study sites can be obtained                                          |                   |
| 18 |                                                           |     |                                                                                                               |                   |
| 19 | Eligibility criteria                                      | 10  | Inclusion and exclusion criteria for participants. If applicable, eligibility criteria for study centres and  | ___ 7,8 ___       |
| 20 |                                                           |     | individuals who will perform the interventions (eg, surgeons, psychotherapists)                               |                   |
| 21 |                                                           |     |                                                                                                               |                   |
| 22 | Interventions                                             | 11a | Interventions for each group with sufficient detail to allow replication, including how and when they will be | ___ 8 ___         |
| 23 |                                                           |     | administered                                                                                                  |                   |
| 24 |                                                           |     |                                                                                                               |                   |
| 25 |                                                           | 11b | Criteria for discontinuing or modifying allocated interventions for a given trial participant (eg, drug dose  | ___ 11 ___        |
| 26 |                                                           |     | change in response to harms, participant request, or improving/worsening disease)                             |                   |
| 27 |                                                           |     |                                                                                                               |                   |
| 28 |                                                           | 11c | Strategies to improve adherence to intervention protocols, and any procedures for monitoring adherence        | ___ 12 ___        |
| 29 |                                                           |     | (eg, drug tablet return, laboratory tests)                                                                    |                   |
| 30 |                                                           |     |                                                                                                               |                   |
| 31 |                                                           | 11d | Relevant concomitant care and interventions that are permitted or prohibited during the trial                 | ___ 13, Fig.1 ___ |
| 32 |                                                           |     |                                                                                                               |                   |
| 33 | Outcomes                                                  | 12  | Primary, secondary, and other outcomes, including the specific measurement variable (eg, systolic blood       | ___ 10,11 ___     |
| 34 |                                                           |     | pressure), analysis metric (eg, change from baseline, final value, time to event), method of aggregation (eg, |                   |
| 35 |                                                           |     | median, proportion), and time point for each outcome. Explanation of the clinical relevance of chosen         |                   |
| 36 |                                                           |     | efficacy and harm outcomes is strongly recommended                                                            |                   |
| 37 |                                                           |     |                                                                                                               |                   |
| 38 | Participant timeline                                      | 13  | Time schedule of enrolment, interventions (including any run-ins and washouts), assessments, and visits for   | ___ 12,13 ___     |
| 39 |                                                           |     | participants. A schematic diagram is highly recommended (see Figure)                                          |                   |
| 40 |                                                           |     |                                                                                                               |                   |
| 41 |                                                           |     |                                                                                                               |                   |
| 42 |                                                           |     |                                                                                                               |                   |
| 43 |                                                           |     |                                                                                                               |                   |
| 44 |                                                           |     |                                                                                                               |                   |
| 45 |                                                           |     |                                                                                                               |                   |
| 46 |                                                           |     |                                                                                                               |                   |

|   |             |    |                                                                                                                                                                                       |             |
|---|-------------|----|---------------------------------------------------------------------------------------------------------------------------------------------------------------------------------------|-------------|
| 1 | Sample size | 14 | Estimated number of participants needed to achieve study objectives and how it was determined, including clinical and statistical assumptions supporting any sample size calculations | _____8_____ |
| 2 |             |    |                                                                                                                                                                                       |             |
| 3 |             |    |                                                                                                                                                                                       |             |
| 4 | Recruitment | 15 | Strategies for achieving adequate participant enrolment to reach target sample size                                                                                                   | _____8_____ |
| 5 |             |    |                                                                                                                                                                                       |             |

### 6 **Methods: Assignment of interventions (for controlled trials)**

#### 7 Allocation:

|    |                    |     |                                                                                                                                                                                                                                                                                                                                                          |                       |
|----|--------------------|-----|----------------------------------------------------------------------------------------------------------------------------------------------------------------------------------------------------------------------------------------------------------------------------------------------------------------------------------------------------------|-----------------------|
| 8  |                    |     |                                                                                                                                                                                                                                                                                                                                                          |                       |
| 9  |                    |     |                                                                                                                                                                                                                                                                                                                                                          |                       |
| 10 | Sequence           | 16a | Method of generating the allocation sequence (eg, computer-generated random numbers), and list of any factors for stratification. To reduce predictability of a random sequence, details of any planned restriction (eg, blocking) should be provided in a separate document that is unavailable to those who enrol participants or assign interventions | _____10_____          |
| 11 | generation         |     |                                                                                                                                                                                                                                                                                                                                                          |                       |
| 12 |                    |     |                                                                                                                                                                                                                                                                                                                                                          |                       |
| 13 |                    |     |                                                                                                                                                                                                                                                                                                                                                          |                       |
| 14 |                    |     |                                                                                                                                                                                                                                                                                                                                                          |                       |
| 15 |                    |     |                                                                                                                                                                                                                                                                                                                                                          |                       |
| 16 | Allocation         | 16b | Mechanism of implementing the allocation sequence (eg, central telephone; sequentially numbered, opaque, sealed envelopes), describing any steps to conceal the sequence until interventions are assigned                                                                                                                                                | _____10_____          |
| 17 | concealment        |     |                                                                                                                                                                                                                                                                                                                                                          |                       |
| 18 | mechanism          |     |                                                                                                                                                                                                                                                                                                                                                          |                       |
| 19 |                    |     |                                                                                                                                                                                                                                                                                                                                                          |                       |
| 20 | Implementation     | 16c | Who will generate the allocation sequence, who will enrol participants, and who will assign participants to interventions                                                                                                                                                                                                                                | _____10_____          |
| 21 |                    |     |                                                                                                                                                                                                                                                                                                                                                          |                       |
| 22 |                    |     |                                                                                                                                                                                                                                                                                                                                                          |                       |
| 23 |                    |     |                                                                                                                                                                                                                                                                                                                                                          |                       |
| 24 | Blinding (masking) | 17a | Who will be blinded after assignment to interventions (eg, trial participants, care providers, outcome assessors, data analysts), and how                                                                                                                                                                                                                | _____10_____          |
| 25 |                    |     |                                                                                                                                                                                                                                                                                                                                                          |                       |
| 26 |                    |     |                                                                                                                                                                                                                                                                                                                                                          |                       |
| 27 |                    | 17b | If blinded, circumstances under which unblinding is permissible, and procedure for revealing a participant's allocated intervention during the trial                                                                                                                                                                                                     | _____Not blinded_____ |
| 28 |                    |     |                                                                                                                                                                                                                                                                                                                                                          |                       |
| 29 |                    |     |                                                                                                                                                                                                                                                                                                                                                          |                       |
| 30 |                    |     |                                                                                                                                                                                                                                                                                                                                                          |                       |

### 31 **Methods: Data collection, management, and analysis**

|    |                 |     |                                                                                                                                                                                                                                                                                                                                                                                                              |                        |
|----|-----------------|-----|--------------------------------------------------------------------------------------------------------------------------------------------------------------------------------------------------------------------------------------------------------------------------------------------------------------------------------------------------------------------------------------------------------------|------------------------|
| 32 |                 |     |                                                                                                                                                                                                                                                                                                                                                                                                              |                        |
| 33 | Data collection | 18a | Plans for assessment and collection of outcome, baseline, and other trial data, including any related processes to promote data quality (eg, duplicate measurements, training of assessors) and a description of study instruments (eg, questionnaires, laboratory tests) along with their reliability and validity, if known. Reference to where data collection forms can be found, if not in the protocol | _____11,12_____        |
| 34 | methods         |     |                                                                                                                                                                                                                                                                                                                                                                                                              |                        |
| 35 |                 |     |                                                                                                                                                                                                                                                                                                                                                                                                              |                        |
| 36 |                 |     |                                                                                                                                                                                                                                                                                                                                                                                                              |                        |
| 37 |                 |     |                                                                                                                                                                                                                                                                                                                                                                                                              |                        |
| 38 |                 |     |                                                                                                                                                                                                                                                                                                                                                                                                              |                        |
| 39 |                 | 18b | Plans to promote participant retention and complete follow-up, including list of any outcome data to be collected for participants who discontinue or deviate from intervention protocols                                                                                                                                                                                                                    | _____12,13,table1_____ |
| 40 |                 |     |                                                                                                                                                                                                                                                                                                                                                                                                              |                        |
| 41 |                 |     |                                                                                                                                                                                                                                                                                                                                                                                                              |                        |
| 42 |                 |     |                                                                                                                                                                                                                                                                                                                                                                                                              |                        |



|    |                                 |     |                                                                                                                                                                                                                                                                                                                                       |               |
|----|---------------------------------|-----|---------------------------------------------------------------------------------------------------------------------------------------------------------------------------------------------------------------------------------------------------------------------------------------------------------------------------------------|---------------|
| 1  | Data management                 | 19  | Plans for data entry, coding, security, and storage, including any related processes to promote data quality (eg, double data entry; range checks for data values). Reference to where details of data management procedures can be found, if not in the protocol                                                                     | ___ 13,14 ___ |
| 2  |                                 |     |                                                                                                                                                                                                                                                                                                                                       |               |
| 3  |                                 |     |                                                                                                                                                                                                                                                                                                                                       |               |
| 4  |                                 |     |                                                                                                                                                                                                                                                                                                                                       |               |
| 5  | Statistical methods             | 20a | Statistical methods for analysing primary and secondary outcomes. Reference to where other details of the statistical analysis plan can be found, if not in the protocol                                                                                                                                                              | ___ 13 ___    |
| 6  |                                 |     |                                                                                                                                                                                                                                                                                                                                       |               |
| 7  |                                 |     |                                                                                                                                                                                                                                                                                                                                       |               |
| 8  |                                 | 20b | Methods for any additional analyses (eg, subgroup and adjusted analyses)                                                                                                                                                                                                                                                              | ___ 13 ___    |
| 9  |                                 |     |                                                                                                                                                                                                                                                                                                                                       |               |
| 10 |                                 | 20c | Definition of analysis population relating to protocol non-adherence (eg, as randomised analysis), and any statistical methods to handle missing data (eg, multiple imputation)                                                                                                                                                       | ___ 13 ___    |
| 11 |                                 |     |                                                                                                                                                                                                                                                                                                                                       |               |
| 12 |                                 |     |                                                                                                                                                                                                                                                                                                                                       |               |
| 13 |                                 |     |                                                                                                                                                                                                                                                                                                                                       |               |
| 14 | <b>Methods: Monitoring</b>      |     |                                                                                                                                                                                                                                                                                                                                       |               |
| 15 |                                 |     |                                                                                                                                                                                                                                                                                                                                       |               |
| 16 | Data monitoring                 | 21a | Composition of data monitoring committee (DMC); summary of its role and reporting structure; statement of whether it is independent from the sponsor and competing interests; and reference to where further details about its charter can be found, if not in the protocol. Alternatively, an explanation of why a DMC is not needed | ___ 14 ___    |
| 17 |                                 |     |                                                                                                                                                                                                                                                                                                                                       |               |
| 18 |                                 |     |                                                                                                                                                                                                                                                                                                                                       |               |
| 19 |                                 |     |                                                                                                                                                                                                                                                                                                                                       |               |
| 20 |                                 |     |                                                                                                                                                                                                                                                                                                                                       |               |
| 21 |                                 |     |                                                                                                                                                                                                                                                                                                                                       |               |
| 22 |                                 | 21b | Description of any interim analyses and stopping guidelines, including who will have access to these interim results and make the final decision to terminate the trial                                                                                                                                                               | ___ NA ___    |
| 23 |                                 |     |                                                                                                                                                                                                                                                                                                                                       |               |
| 24 |                                 |     |                                                                                                                                                                                                                                                                                                                                       |               |
| 25 | Harms                           | 22  | Plans for collecting, assessing, reporting, and managing solicited and spontaneously reported adverse events and other unintended effects of trial interventions or trial conduct                                                                                                                                                     | ___ 14 ___    |
| 26 |                                 |     |                                                                                                                                                                                                                                                                                                                                       |               |
| 27 |                                 |     |                                                                                                                                                                                                                                                                                                                                       |               |
| 28 | Auditing                        | 23  | Frequency and procedures for auditing trial conduct, if any, and whether the process will be independent from investigators and the sponsor                                                                                                                                                                                           | ___ 14 ___    |
| 29 |                                 |     |                                                                                                                                                                                                                                                                                                                                       |               |
| 30 |                                 |     |                                                                                                                                                                                                                                                                                                                                       |               |
| 31 |                                 |     |                                                                                                                                                                                                                                                                                                                                       |               |
| 32 | <b>Ethics and dissemination</b> |     |                                                                                                                                                                                                                                                                                                                                       |               |
| 33 |                                 |     |                                                                                                                                                                                                                                                                                                                                       |               |
| 34 | Research ethics approval        | 24  | Plans for seeking research ethics committee/institutional review board (REC/IRB) approval                                                                                                                                                                                                                                             | ___ Done ___  |
| 35 |                                 |     |                                                                                                                                                                                                                                                                                                                                       |               |
| 36 |                                 |     |                                                                                                                                                                                                                                                                                                                                       |               |
| 37 | Protocol amendments             | 25  | Plans for communicating important protocol modifications (eg, changes to eligibility criteria, outcomes, analyses) to relevant parties (eg, investigators, REC/IRBs, trial participants, trial registries, journals, regulators)                                                                                                      | ___ 15 ___    |
| 38 |                                 |     |                                                                                                                                                                                                                                                                                                                                       |               |
| 39 |                                 |     |                                                                                                                                                                                                                                                                                                                                       |               |
| 40 |                                 |     |                                                                                                                                                                                                                                                                                                                                       |               |
| 41 |                                 |     |                                                                                                                                                                                                                                                                                                                                       |               |
| 42 |                                 |     |                                                                                                                                                                                                                                                                                                                                       |               |

|    |                               |     |                                                                                                                                                                                                                                                                                     |                        |
|----|-------------------------------|-----|-------------------------------------------------------------------------------------------------------------------------------------------------------------------------------------------------------------------------------------------------------------------------------------|------------------------|
| 1  | Consent or assent             | 26a | Who will obtain informed consent or assent from potential trial participants or authorised surrogates, and how (see Item 32)                                                                                                                                                        | ___ 14 ___             |
| 2  |                               |     |                                                                                                                                                                                                                                                                                     |                        |
| 3  |                               |     |                                                                                                                                                                                                                                                                                     |                        |
| 4  |                               | 26b | Additional consent provisions for collection and use of participant data and biological specimens in ancillary studies, if applicable                                                                                                                                               | ___ Not applicable ___ |
| 5  |                               |     |                                                                                                                                                                                                                                                                                     |                        |
| 6  |                               |     |                                                                                                                                                                                                                                                                                     |                        |
| 7  | Confidentiality               | 27  | How personal information about potential and enrolled participants will be collected, shared, and maintained in order to protect confidentiality before, during, and after the trial                                                                                                | ___ 14 ___             |
| 8  |                               |     |                                                                                                                                                                                                                                                                                     |                        |
| 9  |                               |     |                                                                                                                                                                                                                                                                                     |                        |
| 10 | Declaration of interests      | 28  | Financial and other competing interests for principal investigators for the overall trial and each study site                                                                                                                                                                       | ___ 16 ___             |
| 11 |                               |     |                                                                                                                                                                                                                                                                                     |                        |
| 12 |                               |     |                                                                                                                                                                                                                                                                                     |                        |
| 13 | Access to data                | 29  | Statement of who will have access to the final trial dataset, and disclosure of contractual agreements that limit such access for investigators                                                                                                                                     | ___ 14 ___             |
| 14 |                               |     |                                                                                                                                                                                                                                                                                     |                        |
| 15 |                               |     |                                                                                                                                                                                                                                                                                     |                        |
| 16 |                               |     |                                                                                                                                                                                                                                                                                     |                        |
| 17 | Ancillary and post-trial care | 30  | Provisions, if any, for ancillary and post-trial care, and for compensation to those who suffer harm from trial participation                                                                                                                                                       | ___ 13 ___             |
| 18 |                               |     |                                                                                                                                                                                                                                                                                     |                        |
| 19 |                               |     |                                                                                                                                                                                                                                                                                     |                        |
| 20 | Dissemination policy          | 31a | Plans for investigators and sponsor to communicate trial results to participants, healthcare professionals, the public, and other relevant groups (eg, via publication, reporting in results databases, or other data sharing arrangements), including any publication restrictions | ___ 15 ___             |
| 21 |                               |     |                                                                                                                                                                                                                                                                                     |                        |
| 22 |                               |     |                                                                                                                                                                                                                                                                                     |                        |
| 23 |                               |     |                                                                                                                                                                                                                                                                                     |                        |
| 24 |                               | 31b | Authorship eligibility guidelines and any intended use of professional writers                                                                                                                                                                                                      | ___ Not applicable ___ |
| 25 |                               |     |                                                                                                                                                                                                                                                                                     |                        |
| 26 |                               | 31c | Plans, if any, for granting public access to the full protocol, participant-level dataset, and statistical code                                                                                                                                                                     | ___ No ___             |
| 27 |                               |     |                                                                                                                                                                                                                                                                                     |                        |
| 28 |                               |     |                                                                                                                                                                                                                                                                                     |                        |
| 29 | <b>Appendices</b>             |     |                                                                                                                                                                                                                                                                                     |                        |
| 30 |                               |     |                                                                                                                                                                                                                                                                                     |                        |
| 31 | Informed consent materials    | 32  | Model consent form and other related documentation given to participants and authorised surrogates                                                                                                                                                                                  | ___ Appendix ___       |
| 32 |                               |     |                                                                                                                                                                                                                                                                                     |                        |
| 33 |                               |     |                                                                                                                                                                                                                                                                                     |                        |
| 34 | Biological specimens          | 33  | Plans for collection, laboratory evaluation, and storage of biological specimens for genetic or molecular analysis in the current trial and for future use in ancillary studies, if applicable                                                                                      | ___ Not applicable ___ |
| 35 |                               |     |                                                                                                                                                                                                                                                                                     |                        |
| 36 |                               |     |                                                                                                                                                                                                                                                                                     |                        |

\*It is strongly recommended that this checklist be read in conjunction with the SPIRIT 2013 Explanation & Elaboration for important clarification on the items. Amendments to the protocol should be tracked and dated. The SPIRIT checklist is copyrighted by the SPIRIT Group under the Creative Commons "[Attribution-NonCommercial-NoDerivs 3.0 Unported](https://creativecommons.org/licenses/by-nc-nd/3.0/)" license.
